# Supplementary material
Source: PubMed Central journal article supplement (PMC4097447)
Supplement: CVI.00825-13_zcd999095019so1.pdf [file CVI.00825-13_zcd999095019so1.pdf]

>NEIS1969\_1

ATGAAACACTTTCCATCCAAAGTACTGACCACAGCCATCCTTGCCACTTTCTGTAGCGGC  
GCACTGGCAGCCACAAACGACGACGATGTTAAAAAAGCTGCCACTGTGGCCATTGCTGCT  
GCCTACAACAATGGCCAAGAAATCAACGGTTTCAAAGCTGGAGAGACCATCTACGACATT  
GGTGAAGACGGCACAATTACCCAAAAAGACGCAACTGCAGCCGATGTTGAAGCCGACGAC  
TTTAAAGGTCTGGGTCTGAAAAAAGTCGTGACTAACCTGACCAAACCGTCAATGAAAAC  
AAACAAAACGTCGATGCCAAAGTAAAAGCTGCAGAATCTGAAATAGAAAAGTTAAACAACC  
AAGTTAGCAGACACTGATGCCGCTTTAGCAGATACTGATGCCGCTCTGGATGAAACCACC  
AACGCCTTGAATAAATTGGGAGAAAAATATAACGACATTTGCTGAAGAGACTAAGACAAAT  
ATCGTAAAAATTGATGAAAAATTAGAAGCCGTGGCTGATACCGTCGACAAGCATGCCGAA  
GCATTCAACGATATCGCCGATTCATTGGATGAAACCAACACTAAGGCAGACGAAGCCGTC  
AAAACCGCCAATGAAGCCAAACAGACGGCCGAAGAAACCAAACAAAACGTCGATGCCAAA  
GTAAAAGCTGCAGAAACTGCAGCAGGCAAAGCCGAAGCTGCCGCTGGCACAGCTAATACT  
GCAGCCGACAAGGCCGAAGCTGTCGCTGCAAAAAGTTACCGACATCAAAGCTGATATCGCT  
ACGAACAAAGCTGATATTGCTAAAAAAGTCAAGCAGCATCGACAGCTTGGACAAAAACGTA  
GCTAATCTGCGCAAAAGAAACCCGCCAAGGCCTTGCAAGAACAAAGCCGCGCTCTCCGCGCTG  
TTCCAACCTTACAACGTGGGTCTGGTTCAATGTAACGGCTGCAGTGGCGGGCTACAAATCC  
GAATCGGCAGTCGCCATCGGTACCGGCTTCCGCTTTACCGAAAACCTTTGCCGCCAAAGCA  
GGCGTGGCAGTCGGCACTTCGTCCGGTTCTTCCGCAGCCTACCATGTCCGGCTCAATTAC  
GAGTGGTAA

>NEIS1969\_2

ATGAAACACTTTCCATCCAAAGTACTGACCACAGCCATCCTTGCCACTTTCTGTAGCGGC  
GCACTGGCAGCCACAAACGACGACGATGTTAAAAAAGCTGCCACTGTGGCCATTGCTGCT  
GCCTACAACAATGGCCAAGAAATCAACGGTTTCAAAGCTGGAGAGACCATCTACGACATT  
GATGAAGACGGCACAATTACCAAAAAAGACGCAACTGCAGCCGATGTTGAAGCCGACGAC  
TTTAAAGGTCTGGGTCTGAAAAAAGTCGTGACTAACCTGACCAAACCGTCAATGAAAAC  
AAACAAAACGTCGATGCCAAAGTAAAAGCTGCAGAATCTGAAATAGAAAAGTTAAACAACC  
AAGTTAGCAGACACTGATGCCGCTCTGGATGCAACCACCAACGCCTTGAATAAATTGGGA  
GAAAATATAACGACATTTGCTGAAGAGACTAAGACAAATATCGTAAAAATTGATGAAAAA  
TTAGAAGCCGTGGCTGATACCGTCGACAAGCATGCCGAAGCATTCAACGATATCGCCGAT  
TCATTGGATGAAACCAACACTAAGGCAGACGAAGCCGTCAAACCCGCCAATGAAGCCAAA  
CAGACGGCCGAAGAAACCAACAAAACGTCGATGCCAAAGTAAAAGCTGCAGAAACTGCC  
GCTGGCACAGCTAATACTGCAGCCGACAAGCCGAAGCTGTCGCTGCAAAAAGTTACCGAC  
ATCAAAGCTGATATCGCTACGAACAAAGATAATATTGCTAAAAAAGCAAACAGTGCCGAC  
GTGTACACCAGAGAAGAGTCTGACAGCAAAATTTGTGAGAATTGATGGTCTGAACGCTACT  
ACCGAAAAATTGGACACAGCTTGGCTTCTGCCGAAAAATCCATTACCGAACACGGTACG  
CGCCTGAACGGTTTGGATAGAACAGTGTGACAGCTGCGTAAAGAAACCCGCCAAGGCCTT  
GCAGAACAAAGCCGCGCTCTCCGGTCTGTTCCAACCTTACAACGTGGGTCTGGTTCAATGTA  
ACGGCTGCAGTGGCGGGCTACAAATCCGAATCGGCAGTCGCCATCGGTACCGGCTTCCGC  
TTTACCGAAAACCTTTGCCGCCAAAGCAGGCCTGGCAGTCGGCACTTCGTCCGGTTCTTCC  
GCAGCCTACCATGTCCGGCTCAATTACGAGTGGTAA

>NEIS1969\_3

ATGAAACACTTTCCATCCAAAGTACTGACCACAGCCATCCTTGCCACTTTCTGTAGCGGC  
GCACTGGCAGCCACAAACGACGACGATGTTAAAAAAGCTGCCACTGTGGCCATTGCTGCT  
GCCTACAACAATGGCCAAGAAATCAACGGTTTCAAAGCTGGAGAGACCATCTACGACATT  
GATGAAGACGGCACAATTACCAAAAAAGACGCAACTGCAGCCGATGTTGAAGCCGACGAC  
TTTAAAGGTCTGGGTCTGAAAAAAGTCAAGCAGTACTAACCTGACCAAACCGTCAATGAAAAC  
AAACAAAACGTCGATGCCAAAGTAAAAGCTGCAGAATCTGAAATAGAAAAGTTAAACAACC  
AAGTTAGCAGACACTGATGCCGCTCTGGATGCAACCACCAACGCCTTGAATAAATTGGGA  
GAAAATATAACGACATTTGCTGAAGAGACTAAGACAAATATCGTAAAAATTGATGAAAAA  
TTAGAAGCCGTGGCTGATACCGTCGACAAGCATGCCGAAGCATTCAACGATATCGCCGAT  
TCATTGGATGAAACCAACACTAAGGCAGACGAAGCCGTCAAACCCGCCAATGAAGCCAAA  
CAGACGGCCGAAGAAACCAACAAAACGTCGATGCCAAAGTAAAAGCTGCAGAAACTGCA  
GCAGGCAAAGCCGAAGCTGCCGCTGGCACAGCTAATACTGCAGCCGACAAGGCCGAAGCT  
GTCGCTGCAAAAAGTTACCGACATCAAAGCTGATATCGCTACGAACAAAGATAATATTGCT  
AAAAAAGCAAACAGTCCGACGCTGTACACCAGAGAAGAGTCTGACAGCAAAATTTGTGAGA  
ATTGATGGTCTGAACGCTACTACCGAAAAATTTGGACACACGCTTGGCTTCTGCCGAAAAA  
TCCATTACCGAACACGCTACCGCCTGAACGGTTTGGATAGAACAGTGTGACAGTTCGCT  
AAAGAAACCCGCCAAGGCCTTGCAAGAACAAAGCCGCGCTCTCCGGTCTGTTCCAACCTTAC  
AACGTGGGTCTGGTTCAATGTAACGGCTGCAGTGGCGGGCTACAAATCCGAATCGGCAGTC  
GCCATCGGTACCGGCTTCCGCTTTACCGAAAACCTTTGCCGCCAAAGCAGGCCTGGCAGTC  
GGCACTTCGTCCGGTTCTTCCGCAGCCTACCATGTCCGGCTCAATTACGAGTGGTAA

>NEIS1969\_5

ATGAAACACTTTCCATCCAAAGTACTGACCACAGCCATCCTTGCCACTTTCTGTAGCGGC  
GCACTGGCAGCCACAAACGACGACGATGTTAAAAAAGCTGCCACTGTGGCCATTGCTGCT  
GCCTACAACAATGGCCAAGAAATCAACGGTTTCAAAGCTGGAGAGACCATCTACGACATT

GATGAAGACGGCACAATTACCAAAAAAGACGCAACTGCAGCCGATGTTGAAGCCGACGAC  
TTTAAAGGCTTGGGTCTGAAAAAAGTCGTGACTAACCTGACCAAAACCGTCAATGAAAA  
AAACAAAACGTCGATGCCAAAGTAAAAGCTGCAGAATCTGAAATAGAAAAGTTAACAACC  
AAGTTAGCAGACACTGATGCCGCTTTAGCAGATACTGATGCCGCTCTGGATGCAACCACC  
AACGCCTTGAATAAATTTGGGAGAAAATATAACGACATTTGCTGAAGAGACTAAGACAAAT  
ATCGTAAAAAATTGATGAAAAATTAGAAGCCGTGGCTGATACCGTCGACAAGCATGCCGAA  
GCATTCAACGATATCGCCGATTCATTGGATGAAACCAACACTAAGGCAGACGAAGCCGTC  
AAAACCGCCAATGAAGCCAACAGACCGCCGAAGAAACCAACAAAACGTCGATGCCAAA  
GTAAAAGCTGCAGAACTGCAGCAGGCAAAGCCGAAGCTGCCGCTGGCACAGCTAATACT  
GCAGCCGACAAGGCCGAAGCTGTCGCTGCAAAAAGTTACCGACATCAAAGCTGATATCGCT  
ACGAACAAAGATAAATATTGCTAAAAAAGCAAAACAGTGCCGACGTGTACCCAGAGAAGAG  
TCTGACAGCAAATTTGTCAGAATTGATGGTCTGAACGCTACTACCGAAAAATTTGGACACA  
CGCTTGGCTTCTGCCGAAAAATCCATTACCGAACACGGTACGGCCTGAACGGTTTGGAT  
AGAACAGTGTGACACCTGCGTAAAGAAACCCGCCAAGGCCCTTGAGAACAAGCCGCGCTC  
TCCGGTCTGTTCCAACCTTACAACGTGGGTTCGTTCAATGTAACGGCTGCAGTCGGCGGC  
TACAAATCCGAATCGGCAGTCGCCATCGGTACCGGCTTCCGCTTTACCGAAAACTTTGCC  
GCCAAAGCAGGCGTGGCAGTCGGCACTTCCGCGGTTCTTCCGAGCCTACCATGTCGGC  
GTCAATTACGAGTGGTAA

>NEIS1969\_6

ATGAAACACTTTCCATCCAAAGTACTGACCACAGCCATCCTTGCCACTTTCTGTAGCGGC  
GCACTGGCAGCCACAAACGACGACGATGTTAAAAAAGCTGCCACTGTGGCCATTGCTGCT  
GCCTACAACAATGGCCAAGAAATCAACGGTTTCAAAGCTGGAGAGACCATCTACGACATT  
GATGAAGACGGCACAATTACCAAAAAAGACGCAACTGCAGCCGATGTTGAAGCCGACGAC  
TTTAAAGGCTTGGGTCTGAAAAAAGTCGTGACTAACCTGACCAAAACCGTCAATGAAAA  
AAACAAAACGTCGATGCCAAAGTAAAAGCTGCAGAATCTGAAATAGAAAAGTTAACAACC  
AAGTTAGCAGACACTGATGCCGCTTTAGCAGATACTGATGCCGCTCTGGATGCAACCACC  
AACGCCTTGAATAAATTTGGGAGAAAATATAACGACATTTGCTGAAGAGACTAAGACAAAT  
ATCGTAAAAAATTGATGAAAAATTAGAAGCCGTGGCTGATACCGTCGACAAGCATGCCGAA  
GCATTCAACGATATCGCCGATTCATTGGATGAAACCAACACTAAGGCAGACGAAGCCGTC  
AAAACCGCCAATGAAGCCAACAGACCGCCGAAGAAACCAACAAAACGTCGATGCCAAA  
GTAAAAGCTGCAGAACTGCAGCAGGCAAAGCCGAAGCTGCCGCTGGCACAGCTAATACT  
GCAGCCGACAAGGCCGAAGCTGTCGCTGCAAAAAGTTACCGACATCAAAGCTGATATCGCT  
ACGAACAAAGATAAATATTGCTAAAAAAGCAAAACAGTGCCGACGTGTACCCAGAGAAGAG  
TCTGACAGCAAATTTGTCAGAATTGATGGTCTGAACGCTACTACCGAAAAATTTGGACACA  
CGCTTGGCTTCTGCTGAAAAATCCATTGCCGATCACGATACTCGCCTGAACGGTTTGGAT  
AAAACAGTGTGACACCTGCGCAAAGAAACCCGCCAAGGCCCTTGAGAACAAGCCGCGCTC  
TCCGGTCTGTTCCAACCTTACAACGTGGGTTCGTTCAATGTAACGGCTGCAGTCGGCGGC  
TACAAATCCGAATCGGCAGTCGCCATCGGTACCGGCTTCCGCTTTACCGAAAACTTTGCC  
GCCAAAGCAGGCGTGGCAGTCGGCACTTCCGCGGTTCTTCCGAGCCTACCATGTCGGC  
GTCAATTACGAGTGGTAA

>NEIS1969\_7

ATGAAACACTTTCCATCCAAAGTACTGACCACAGCCATCCTTGCCACTTTCTGTAGCGGC  
GCACTGGCAGCCACAAACGACGACGATGTTAAAAAAGCTGCCACTGTGGCCATTGCTGCT  
GCCTACAACAATGGCCAAGAAATCAACGGTTTCAAAGCTGGAGAGACCATCTACGACATT  
GATGAAGACGGCACAATTACCAAAAAAGACGCAACTGCAGCCGATGTTGAAGCCGACGAC  
TTTAAAGGCTTGGGTCTGAAAAAAGTCGTGACTAACCTGACCAAAACCGTCAATGAAAA  
AAACAAAACGTCGATGCCAAAGTAAAAGCTGCAGAATCTGAAATAGAAAAGTTAACAACC  
AAGTTAGCAGACACTGATGCCGCTTTAGCAGATACTGATGCCGCTCTGGATGCAACCACC  
AACGCCTTGAATAAATTTGGGAGAAAATATAACGACATTTGCTGAAGAGACTAAGACAAAT  
ATCGTAAAAAATTGATGAAAAATTAGAAGCCGTGGCTGATACCGTCGACAAGCATGCCGAA  
GCATTCAACGATATCGCCGATTCATTGGATGAAACCAACACTAAGGCAGACGAAGCCGTC  
AAAACCGCCAATGAAGCCAACAGACCGCCGAAGAAACCAACAAAACGTCGATGCCAAA  
GTAAAAGCTGCAGAACTGCAGCAGGCAAAGCCGAAGCTGCCGCTGGCACAGCTAATACT  
GCAGCCGACAAGGCCGAAGCTGTCGCTGCAAAAAGTTACCGACATCAAAGCTGATATCGCT  
ACGAACAAAGATAAATATTGCTAAAAAAGCAAAACAGTGCCGACGTGTACCCAGAGAAGAG  
TCTGACAGCAAATTTGTCAGAATTGATGGTCTGAACGCTACTACCGAAAAATTTGGACACA  
CGCTTGGCTTCTGCTGAAAAATCCATTGCCGATCACGATACTCGCCTGAACGGTTTGGAT  
AAAACAGTGTGACACCTGCGCAAAGAAACCCGCCAAGGCCCTTGAGAACAAGCCGCGCTC  
TCCGGTCTGTTCCAACCTTACAACGTGGGTTCGTTCAATGTAACGGCTGCAGTCGGCGGC  
TACAAATCCGAATCGGCAGTCGCCATCGGTACCGGCTTCCGCTTTACCGAAAACTTTGCC  
GCCAAAGCAGGCGTGGCAGTCGGCACTTCCGCGGTTCTTCCGAGCCTACCATGTCGGC  
GTCAATTACGAGTGGTAA

>NEIS1969\_8

ATGAAACACTTTCCATCCAAAGTACTGACCACAGCCATCCTTGCCACTTTCTGTAGCGGC  
GCACTGGCAGCCACAAACGACGACGATGTTAAAAAAGCTGCCACTGTGGCCATTGCTGCT  
GCCTACAACAATGGCCAAGAAATCAACGGTTTCAAAGCTGGAGAGACCATCTACGACATT  
GATGAAGACGGCACAATTACCAAAAAAGACGCAACTGCAGCCGATGTTGAAGCCGACGAC

TTTAAAGGTCTGGGTCTGAAAAAGTCTGACTAACCTGACCAAACCGTCAATGAAAA  
AAACAAAACGTTCGATGCCAAAGTAAAAGCTGCAGAATCTGAAATAGAAAAGTTAAACAACC  
AAGTTAGCAGACACTGATGCCGCTTTAGCAGATACTGATGCCGCTCTGGATGCAACCACC  
AACGCCTTGAATAAATTTGGGAGAAAATATAACGACATTTGCTGAAGAGACTAAGACAAAT  
ATCGTAAAAATTTGATGAAAAATTAGAAGCCGTGGCTGATACCGTCGACAAGCATGCCGAA  
GCATTCAACGATATCGCCGATTCATTGGATGAAACCAACACTAAGGCAGACGAGCCGTC  
AAAACCGCAATGAAGCCAAACAGACGGCCGAAGAAACCAACAAAACGTTCGATGCCAAA  
GTAAAAGCTGCAGAACTGCAGCAGGCAAAGCCGAAGCTGCCGCTGGCACAGCTAATACT  
GCAGCCGACAAGGCCGAAGCTGTTCGCTGCAAAAAGTTACCGACATCAAAGCTGATATCGCT  
ACGAACAAAGATAATATTGCTAAAAAGCAAACAGTGCCGACGTGTACACCAGAGAAGAG  
TCTGACAGCAAATTTGTCAGAAATTTGATGGTCTGAACGCTACTACCGAAAAATTTGGACACA  
CGCTTGGCTTCTGCTGAAAAATCCATTGCCGAACACGGTACGCGCCTGAACGGTTTGGAT  
AAAACAGTGTGACACTGCGCAAAGAAACCGCCAAGGCCTTGCAGAACAGCCGCGCTC  
TCCGGTCTGTTCCAACCTTACAACGTGGGTTCGTTCAATGTAACGGCTGCAGTCGGCGGC  
TACAAATCCGAATCGGCAGTCCGCATCGGTACCGGCTTCCGCTTTACCGAAAACTTTGCC  
GCCAAAGCAGCGTGGCAGTCCGCACTTCGTTCCGGTTCCTCCGACGCTACCATGTCGGC  
GTCAATTACGAGTGGTAA

>NEIS1969\_9

ATGAAACACTTTCAATCCAAAGTACTGACCCGAGCCATCCTTGCCCTCTCTGTAGCGGC  
CGCTGGCGGCATCAAACAGTGTAGACCCGAGGTCACTCGACCACAGCTCGAGAAGTTG  
CCACAGCCGCTGGTTGGAGCCTACAACAATGCCAAGAATCAACGGTTTCAAAGTTCG  
GAGACACCATCTACGACATTAATGGAAGCGCGGAAATTACCCAAAAGAAGCAACCCAAG  
AAGATGTCGATAACGACGACTTTAAAGGTCTGGGTCTGAAAGAAGTCTGGCTCAACACG  
ACCAAAGCCTTGCCGACCTGACCGGAATCGTCGAGGAAAACAGCGAAGCATTGGTAAAAA  
CCGCCAAGGTTGTCAATGACATCAGTGCAGTGTTCATTGACAACACAGCAGCTATCGGGG  
AAAACAAAGCTGTATTCGCCAAAAGGCAGATCAAACCGCATTGGATGCAGTATCCGAAA  
AGGTAACCGCAAATGAAACTGCTATCGCTACAAAAGCAGACAAAACCGAACTGGATAAAG  
TGTCCGGCAAAGTAACCGCAAACGAGACTGCTATCGCTACAAAAGCAGACAAAACCGAAC  
TGGATAAAGTGTCCGGCAAAGTAACCGCAAACGAGACTGCTATCGCTACAAAAGCAAACA  
GTGCCGACGTGTACACTAAAGCTGAGGTGTACACCAAACAGAGTCTGACAACAGATTTG  
TCAAATTTGGTGACAGAATCGGTAATCTGAACACTACTGCCGATGGATTGGATACACGCT  
TGAAGACTGCCGAAAAAACCTTACCAGAACACGGTACGCGCTGGACGGCTTGGATAAAA  
CAGTGTCAAACCTGCGTAAAGAAACCGCCAAAGGCCCTTGCAGAACAGCCGCGCTCTCCG  
GCCTGTTCCAACCTTACAACGTGGGTTCGTTCAATGTAACGGCTGCAGTCGGCGGCTACA  
AATCCGAATCGGCAGTCCGCATCGGTACCGGCTTCCGCTTTACCGAAAACTTTGCCGCCA  
AAGCAGGCGTGGCAGTCCGCACTTCGTTCCGGTTCCTCCGACGCTACCATGTCGGCGTCA  
ATTACGAGTGGTAA

>NEIS1969\_10

ATGAAACACTTTCCATCCAAAGTACTGACCACAGCCATCCTTGCCACTTTCTGTAGCGGC  
GCACTGGCAGCCACAAACGACGACGATGTTAAAAAAGCTGCCACTGTGGCCATTGCTGCT  
GCCTACAACAATGGCCAAAGAAATCAACGGTTTCAAAGCTGGAGAGACCATCTACGACATT  
GATGAAGACGGCACAATTACCAAAAAGACGCAACTGCAGCCGATGTTGAAGCCGACGAC  
TTTAAAGGTCTGGGTCTGAAAAAAGTCTGACTAACCTGACCAAAAACCGTCAATGAAAA  
AAACAAAACGTCGATGCCAAAGTAAAAGCTGCAGAATCTGAAATAGAAAAGTTAAACAACC  
AAGTTAGCAGACACTGATGCCGCTCTGGATGCAACCACCAACGCTTGAATAAATTGGGA  
GAAAATATAACGACATTTGCTGAAGAGACTAAGACAAATATCGTAAAAATTTGATGAAAA  
TTAGAAGCCGTGGCTGATACCGTCGACAAGCATGCCGAAGCATTCAACGATATCGCCGAT  
TCATTGGATGAAACCAACACTAAGGCAGACGAAGCCGTCAAAACCGCCAAATGAAGCCAAA  
CAGACGGCCGAAGAAACCAACAAAACGTCGATGCCAAAGTAAAAGCTGCAGAAAACGCA  
GCAGGCAAAGCCGAAGCTGCCGCTGGCACAGCTAATACTGCAGCCGACAAGCCGAAGCT  
GTCGCTGCAAAAGTTACCGACATCAAAGCTGATATCGCTACGAACAAAGATAATAATTGCT  
AAAAAAGCAAACAGTGCAGCAGTGTACACCAGAGAAGAGTCTGACAGCAAATTTGTGAGA  
ATTGATGGTCTGAACGCTACTACCGAAAAATTTGGACACACGCTTGGCTTCTGCCGAAAA  
TCCATTACCGAACACGCTACCGCCTGAACGGTTTGGATAGAACAGTGTGACACTGCGT  
AAAGAAACCCGCCAAGGCCCTTGCAGAACAGCCGCGCTCTCCGGTCTGTTCCAACCTTAC  
AACGTGGGTTCGTTCAATGTAACGGCTGCAGTCGGCGGCTACAAATCCGAATCGGCAGTC  
GCCATCGGTACCGGCTTCCGCTTTACCGAAAACTTTGCCGCCAAAGCAGGCGTGGCAGTC  
GGCACTTCGTTCCGGTTCCTCCGACGCTACCATGTCGGCGTCAATTATGAGTGGTAA

>NEIS1969\_11

ATGAAACACTTTCCATCCAAAGTACTGACCACAGCCATCCTTGCCACTTTCTGTAGCGGC  
GCACTGGCAGCCACAAACGACGACGATGTTAAAAAAGCTGCCACTGTGGCCATTGCTGCT  
GCCTACAACAATGGCCAAAAAATCAACGGTTTCAAAGCTGGAGAGACCATCTACGACATT  
GATGAAGACGGCACAATTACCAAAAAGACGCAACTGCAGCCGATGTTGAAGCCGACGAC  
TTTAAAGGTCTGGGTCTGAAAAAAGTCTGACTAACCTGACCAAAAACCGTCAATGAAAA  
AAACAAAACGTCGATGCCAAAGTAAAAGCTGCAGAATCTGAAATAGAAAAGTTAAACAACC  
AAGTTAGCAGACACTGATGCCGCTCTGGATGCAACCACCAACGCTTGAATAAATTGGGA  
GAAAATATAACGACATTTGCTGAAGAGACTAAGACAAATATCGTAAAAATTTGATGAAAA

TTAGAAGCCGTGGCTGATACCGTCGACAAGCATGCCGAAGCATTCAACGATATCGCCGAT  
TCATTGGATGAAACCAACACTAAGGCAGACGAAGCCGTCAAACCCGCAATGAAGCCAAA  
CAGACGGCCGAAGAAACCAACAAAACGTCGATGCCAAAGTAAAAGCTGCAGAACTGCA  
GCAGCCAAAGCCGAAGCTGCCGTGGCAGACTAATCTGCAGCCGACAAGCCGAAGCT  
GTCGCTGCAAAAGTTACCGACATCAAAGCTGATATCGCTACGAACAAAGATAAATATTGCT  
AAAAAAGCAAACAGTGCAGCAGTGTACACCAGAGAAGAGTCTGACAGCAAATTTGTCAGA  
ATTGATGGTCTGAACGCTACTACCGAAAAATTTGGACACACGCTTGGCTTCTGCCGAAAA  
TCCATTACCGAACACGGTACGCGCTGAACGGTTTGGATAGAACAGTGTGACAGCCTGCGT  
AAAGAAACCCGCCAAGGCCTTGCAGAACAGCCGCGCTCTCCGGTCTGTTCCAACCTTAC  
AACGTGGGTCCGTTCAATGTAACGGCTGCAGTCCGGCGGCTACAAATCCGAATCGGCAGTC  
GCCATCGGTACCGGCTTCCGCTTTACCGAAAACTTTGCCGCCAAAGCAGGCGTGGCAGTC  
GGCACTTCGTCGGTCTTCCGACGCTACCATGTCCGGCTCAATTACGAGTGGTAA

>NEIS1969\_12

ATGAAACACTTTCAATCCAAAGTACTGACCGCAGCCATCCTTGCCGCCCTCAGCGGCAGC  
GCAATGGCAGACAACCCCCCTTCCACTGACGAAATTGCCAAAGCCGCCCTGGTTGGAG  
TCTACAACAATACCCAAGACATCAACGGATTCAAAGTCGGAGACACCATCTACGACATTG  
AAAATGGCCAGCCTAAAGGAAGACCAGCAACAGAAGACGATGTTAAAGCCGATGACTTCG  
GCGGTCTGGGTCTGAAAGAAGTCTTGGCTCAACACGACCAAAGCCTTGCCGACCTGACCG  
GAACCGTCGAGGAAAACAGCGAAGCATTGGTGAAAACCGCCGAGGTTGTCAATGACATCA  
GTGCCGATGTCAAAGCCAACACAGCAGCTATCAGGGAAAACAAGCTGCTATCGCTACAA  
AAGCAGACAAAACCGAAGTGGATGAAGTGTCCGGCAAGGTAACCGCAAACGAGACTGCTA  
TCGGTAAAAAAGCAAACAGTGCAGCAGTGTACACTAAAGCTGAGGTGTACACCAAACAAG  
AGTCTGACAACAGATTTGTCAAATTTGGTGACAGAATCGGTAATCTGAACACTACTGCCA  
ATGGATTGGAGACACGCTTGGCCGATGCCGAAAAATCCGTTAAAGACCACGGTACGCGCT  
TGGCTTCTGCCGAAAAATCCATTACCGAACACGGTACGCGCCTGAACGGTTTGGATAGAA  
CAGTGTGACAGCTGCGCAAAGAAACCCGCCAAGGCCTTGCAGAACAGCCGCGCTCTCCG  
GCTGTTCCAACCTTACAACGTGGGTCCGTTCAATGTAACGGCTGCAGTCCGGCGGCTACA  
AATCCGAATCGGCAGTCCCATCGGTACCGGCTTCCGCTTTACCGAAAACTTTGCCGCCA  
AAGCAGGCGTGGCAGTCCGCCTTCGTCGGTCTTCCGACGCTACCATGTCCGGCTCA  
ATTACGAGTGGTAA

>NEIS1969\_13

ATGAAACACTTTCAATCCAAAGTACTGACCGCAGCCATCCTTGCCACTTTCTGTAGCGGC  
GCACTGGCAGCCACAAACGACGACGATGTTAAAAAAGCTGCCACTGTGGCCATTGCTGCT  
GCCTACAACAATGGCCAAGAAATCAACGGTTTCAAAGCTGGAGAGACCATCTACGACATT  
GATGAAGACGGCACAATTACCAAAAAAGACGCAACTGCAGCCGATGTTGAAGCCGACGAC  
TTTAAAGGTCCTGGGTCTGAAAAAAGTCTGACTAACCTGACCAAAACCGTCAATGAAAA  
AAACAAAACGTCGATGCCAAAGTAAAAGCTGCAGAATCTGAAATAGAAAAGTTAACAACC  
AAGTTAGCAGACACTGATGCCGCTTGGATGCAACCACCAACGCTTGAATAAATTTGGGA  
GAAAATATAACGACATTTGCTGAAGAGACTAAGACAAATATCGTAAAAATTTGATGAAAA  
TTAGAAGCCGTGGCTGATACCGTCGACAAGCATGCCGAAGCATTCAACGATATCGCCGAT  
TCATTGGATGAAACCAACACTAAGGCAGACGAAGCCGTCAAACCCGCAATGAAGCCAAA  
CAGACGGCCGAAGAACCAACAAAACGTCGATGCCAAAGTAAAAGCTGCAGAACTGCA  
GCAGGCAAAGCCGAAGCTGCCGCTGGCACAGCTAATACTGCAGCCGACAAGGCCGAAGCT  
GTCGCTGCAAAAGTTACCGACATCAAAGCTGATATCGCTACGAACAAAGATAAATATTGCT  
AAAAAAGCAAACAGTGCAGCAGTGTACACCAGAGAAGAGTCTGACAGCAAATTTGTCAGA  
ATTGATGGTCTGAACGCTACTACCGAAAAATTTGGACACACGCTTGGCTTCTGCCGAAAA  
TCCATTACCGAACACGGTACGCGCTGAACGGTTTGGATAGAACAGTGTGACAGCCTGCGT  
AAAGAAACCCGCGCAAGGCTTGCAGAACAAAGCCGCGCTCTCCGGTCTGTTCCAACCTTAC  
AACGTGGGTCCGTTCAATGTAACGGCTGCAGTCCGGCGGCTACAAATCCGAATCGGCAGTC  
GCCATCGGTACCGGCTTCCGCTTTACCGAAAACTTTGCCGCCAAAGCAGGCGTGGCAGTC  
GGCACTTCGTCGGTCTTCCGACGCTACCATGTCCGGCTCAATTACGAGTGGTAA

>NEIS1969\_16

ATGAAACACTTTCAATCCAAAGTACTGACCCACAGCCATCCTTGCCACTTTCTGTAGCGGC  
GCACTGGCAGCCACAAACGACGACGATGTTAAAAAAGCTGCCACTGTGGCCATTGCTGCT  
GCCTACAACAATGGCCAAGAAATCAACGGTTTCAAAGCTGGAGAGACCATCTACGACATT  
GATGAAGACGGCACAATTACCAAAAAAGACGCAACTGCAGCCGATGTTGAAGCCGACGAC  
TTTAAAGGTCCTGGGTCTGAAAAAAGTCTGACTAACCTGACCAAAACCGTCAATGAAAA  
AAACAAAACGTCGATGCCAAAGTAAAAGCTGCAGAATCTGAAATAGAAAAGTTAACAACC  
AAGTTAGCAGACACTGATGCCGCTCTGGATGCAACCACCAACGCTTGAATAAATTTGGGA  
GAAAATATAACGACATTTGCTGAAGAGACTAAGACAAATATCGTAAAAATTTGATGAAAA  
TTAGAAGCCGTGGCTGATACCGTCGACAAGCATGCCGAAGCATTCAACGATATCGCCGAT  
TCATTGGATGAAACCAACACTAGGGCGTGTCTCAATTTAACTTAGCATGAATAATAGAG  
CAAGCCAAGTAAAGCATCGATTTAAAATACGAGCTAATTTCTCATAGCGAGTAGCAATA  
CTACGAAACTGCTTTAATCGTCAAAATGCATTTCTCGACTAAGTGGCGTAATTTATAAAGG  
TAGCTATCAAATCAGGGTTAGGTTTCTTGGCATTTTTACGCTTTGGTATAATAGCTTTC  
ATACCGTGTCTATCGCTTTATCTCTGATTTCTTGGCAGTCAATCCCTTTGTCAGCGATA  
AAATACTGGGCTCTTGTATGACTTCTATCAAGTCGTTTGAACCTTGACCGTCCGTGCACG

TTACCCCCAGTGACTTTAAAAATCGAGCGGATTTCCATGCGAGTCCACACATAGGTGTATT  
TTTGTTCGTGTTTCCGCCACGGCTTTGTCCAATTGCTCTATCGAAACCACGCCGAGCTCCA  
CTTGCATGTTGATGACACCCGTACATAAATTCCGTCGATGAATACCCATTTCTTTGTCAATT  
TCTTTTCGTAGATCAAAAAAATTTCTGCCACAAGCCTTTTGTAGACCATCGGTTAAAGC  
GGTTATAAGCGGTTTTCCATGACCCTAGCTCAATAGGTATGTCTCGCCATGGTGCACCTG  
TTCTTAGCTTCCATAGTATGGCTTCCATCACGGTACGGTCTTCTTCCATTGATGACAGC  
CGTGGCTTTTCATGGTTGTTTGTAAATTGTTCCCATATGTTGTCAGTTATTGCGGTTCTCG  
ACATTGTTTGTGTTTGCCTATATTTTCGTTGGAATATAGGGTTAAAAATAGGGCTCTTTTGG  
GCTTATTCAAATTAGGGACACGCCCTAAGGCAGACGAAGCCGTCAAACCGCCAATGAAG  
CCAAACAGACGGCCGAAGAAACCAAAACAAACGTCGATGCCAAAGTAAAAGCTGCAGAAA  
CTGCCGCTGGCAGACTAATACTGCAGCCGACAAGGCCGAAGCTGTGCTGCAAAAAGTTA  
CCGACATCAAAGCTGATATCGCTACGAACAAAGATAATATTGCTAAAAAAGCAAACAGTG  
CCGACGTGTACACCAGAGAAGAGTCTGACAGCAAATTTGTGAGAATTGATGGTCTGAACG  
CTACTACCGAAAAATTGGACACACGCTTGGCTTCTGCCGAAAAATCCATTACCGAACACG  
GTACGGCCTGAACGGTTTGGATAGAACAGTGTGACAGCTGCGTAAAGAAACCCGCCAAG  
GCCTTGCAAGCAAGCCGCTCTCCGGTCTGTTCCAACCTTACAACGTGGGTCTGGTTCA  
ATGTAACGGCTGCAGTCCGGCTTACAAATCCGAATCGGCAGTCCCATCGGTACCGGCT  
TCCGCTTTACCGAAAACCTTTGCCGCAAAGCAGGCGTGGCAGTCCGCACCTTCGTCCGGTT  
CTTCCGCAGCTTACCATGTCCGCGTCAATTACGAGTGGTAA

>NEIS1969\_19

ATGAAACACTTTCCATCCAAAGTACTGACCACAGCCATCCTTGCCACTTTCTGTAGCGGC  
GCACTGGCAGCCACAAGCGACGACGATGTTAAAAAAGCTGCCACTGTGGCCATTGTTGCT  
GCCTACAACAATTGGCCAAGAAATCAACGGTTTCAAAGCTGGAGAGACCATCTACGACATT  
GGTGAAGACGGCACAATTACCCAAAAAGACGCAACTGCAGCCGATGTTGAAGCCGACGAC  
TTTAAAGGCTTGGGTCTGAAAAAAGTCTGACTAACCTGACCAAAACCGTCAATGAAAAC  
AAACAAAACGTCGATGCCAAAGTAAAAGCTGCAGAATCTGAAATAGAAAAGTTAACAACC  
AAGTTAGCAGACACTGATGCCGCTTTAGCAGATACTGATGCCGCTCTGGATGAAAACCACC  
AACGCCTTGAATAAATTGGGAGAAAATATAACGACATTTGCTGAAGAGACTAAGACAAAT  
ATCGTAAAAATTGATGAAAAATTAGAAGCCGTGGCTGATACCGTCGACAAGCATGCCGAA  
GCATTCACGATATCGCCGATTCATTGGATGAAACCAACACTAAGGCAGACGAAGCCGTC  
AAAACCGCCAATGAAGCCAAACAGACGGCCGAAGAAACCAAAACAAACGTCGATGCCAAA  
GTAAGGCTGCAGAAACTGCAGCAGGCAAAGCCGAAGCTGCCGCTGGCAGCTAATACT  
GCAGCCGACAAGGCCGAAGCTGTGCTGCAAAAAGTTACCGACATCAAAGCTGATATCGCT  
ACGAACAAAGCTGATATTGCTAAAAACTCAGCACGCATCGACAGCTTGGACAAAACGTA  
GCTAATCTGCCCAAAGAAACCCGCCAAGGCCCTTGCAGAACAGCCGCGCTCTCCGGCCTG  
TTCCAACCTTACAACGTGGGTCTGGTTCAATGTAACGGCTGCAGTCCGGCGGTACAAATCC  
GAATCGGCAGTCGCCACTCGGTACGGCTTCCGCTTTACCGAAAACCTTTGCCGCAAAGCAG  
GCGTGGCAGTCCGCACTTCCGTTCTCCGCTTCCGCGAGCCTACCATGTCCGGCTCAATTACG  
AGTGGTAAGCAGCATCTCCCATAAAGAAACCCGACGCCCTGCAAGGCTGCGGTTTTTTATT  
TTCTATCCGGCCGTGACACTGCCGCTCCGAAAGCTTCGCCCGTGGGATACGGATTGCCT  
CCTCAACCGGCAGCACAAAAATCTTCCGCTCGCCGATTTTCCCGAACCGGCCACCTCGA  
CAATCACGTCAATCGCGGCTTCCACAGCATCATCCGCCAACACCAGCTCGATTTTGA

>NEIS1969\_20

ATGAAACACTTTCCAATCCAAAGTACTGACCGCAGCCATCCTTGCCACTTTCTGTAGCGGC  
GCACTGGCAGCCACAACGACGACGATGTTAAAAAAGCTGCCACTGTGGCCATTGCTGCT  
GCCTACAACAATTGGCCAAGAAATCAACGGTTTCAAAGCTGGAGAGACCATCTACGACATT  
GGTGAAGACGGCACAATTACCAAAAAAGACGCAACTGCAGCCGATGTTGAAGCCGACGAC  
TTTAAAGGCTTGGGTCTGAAAAAAGTCTGACTAACCTGACCAAAACCGTCAATGAAAACA  
AAACAAAACGTCGATGCCAAAGTAAAAGCTGCAGAAACTGCAGCAGGCAAAGCCGAAGCTG  
CCGCTGGCAGCTAATACTGCAGCCGACAAGGCCGAAGCTGTGCTGCAAAAAGTTACCG  
ACATCAAAGCTGATATCGCTACGAACAAAGATAATATTGCTAAAAAAGCAAACAGTCCCG  
ACGTGTACACCAGAGAAGAGTCTGACAGCAAATTTGTCAGAATTGATGGTCTGAACGCTA  
CTACCGAAAAATTGGACACACGCTTGGCTTCTGCTGAAAAATCCATTGCCGATCACGATA  
CTCGCCTGAACGGTTTTGGATAAAAACAGTGTGACAGCTGCGCAAAGAAACCCGCCAAGGCC  
TTGCAGAACAAAGCCGCGCTCTCCGGTCTGTTCCAACCTTACAACGTGGGTCTGGTTCAATG  
TAACGGCTGCAGTCCGGCGGTACAAATCCGAATCGGCAGTCCCATCGGTACCGGCTTCC  
GCTTTACCGAAAACCTTTGCCGCAAAGCAGGCGTGGCAGTCCGCACCTTCGTCCGGTTCTT  
CCGCGCCTACCATGTCCGGCTCAATTACGAGTGGTAA

>NEIS1969\_22

ATGAAACACTTTCCATCCAAAGTACTGACCACAGCCATCCTTGCCACTTTCTGTAGCGGC  
GCACTGGCAGCCACAACGACGACGATGTTAAAAAAGCTGCCACTGTGGCCATTGCTGCT  
GCCTACAACAATTGGCCAAGAAATCAACGGTTTCAAAGCTGGAGAGACCATCTACGACATT  
GATGAAGACGGCACAATTACCAAAAAAGACGCAACTGCAGCCGATGTTGAAGCCGACGAC  
TTTAAAGGCTTGGGTCTGAAAAAAGTCTGACTAACCTGACCAAAACCGTCAATGAAAAC  
AAACAAAACGTCGATGCCAAAGTAAAAGCTGCAGAATCTGAAATAGAAAAGTTAACAACC  
AAGTTAGCAGACACTGATGCCGCTTGGATGCAACCACCAACGCTTGAATAAATTGGGA  
GAAAATATAACGACATTTGCTGAAGAGACTAGGGCGTGTCTCAATTTAACTTAGCATGA

ATAATAGAGCAAGCCAAGTAAAGCATCGATTTAAAATTACGAGCTAATTTCTCATAGCGA  
GTAGCAATACTACAGAAACTGCTTTAATCGTGCAAATGCATTTCTCGACTAAGTGGCAGTA  
ATTTATAAAGGTAGTACTCAAAAATCAGGGTTAGGTTTCTTGGCATTTTTACGCTTTGGTA  
TAATAGCTTTTATACCTGTCTTATCTCTGATTTCTTGGCAGTGCATACCCCTT  
TGTCAGCGATAAAAATACTGGGCTTCTTGTATGACTTCTATCAAGTCGTTTGAACCTGAC  
CGTCGTGCACGTTACCCCCAGTGACTTTAAAAATCGAGCGGATTTCCATGCGAGTCCACAC  
ATAGGTGTATTTTTGTGCTGTTTCCGCCACGGCTTTGTCCAATTGCTCTATCGAAACCAC  
GCCGAGCTCCACTTGCATGTTGATGACACCGTACATAACTTCCGTCGATGAATACCCATT  
CTTTGTCAATTTCTTTTCTGATGATCAAAAAAAATTTCTGCCACAAGCCTTTTTTAGACCA  
TCGGTTAAAGCGGTTATAAGCGGTTTTCCATGACCCTAGCTCAATAGGTATGTCTCGCCA  
TGGTGCACCTGTCTTAGCTTCCATAGTATGGCTTCCATCAGGTACGGTCGTTCTTCCA  
TTGATGACAGCCGTGCGCTTTCATGGTTGTTTGTAAATGTTCCCATATGTTGTCAGTTAT  
TGCGGTTCTCGCCATTGTTTGTGTTGCTTATATTTCTGTTGGAATATAGGGTTAAAATAG  
GGCTCTTTTGGGCTTATTCAAATTAGGGACACGCCCTAAGACAAAATATCGTAAAAATTGA  
TGAAAAATTAGAAGCCGTGGCTGATACCGTCGACAAGCATGCCGAAGCATTCAACGATAT  
CGCCGATTCATTGGATGAAACCAACACTAAGGCAGACGAAGCCGTCAAAACCGCCAATGA  
AGCCAAACAGACGGCCGAAGAAACCAAACAAAACGTCGATGCCAAAGTAAAAGCTGCAGA  
AACTGCCGCTGGCACAGCTAACTGTCAGCCGACAAGGCCGAAGCTGTCGCTGCAAAAAGT  
TACCGACATCAAAGCTGATATCGCTACGAACAAAGATAATATTGCTAAAAAAGCAAACAG  
TGCCGACGTGTACACCAGAGAAGAGTCTGACAGCAAATTTGTCAGAATTGATGGTCTGAA  
CGTACTACTCCGAAAATTTGGACACAGCTTGGCTTCTGCCGAAAATCCATACCGAACA  
CCGTACGCGCCTGAAACGGTTTGGATAGAACAGTGTGACACCTGCGTAAAGAAACCCGCCA  
AGGCCTTGCAGAAACAGCCGCGCTCTCCGGTCTGTTCCAACCTTACAACGTGGGTGCGGT  
CAATGTAACGGCTGACAGTCGGCGGCTACAAATCCGAATCGGCAGTCGCCATCGGTACCGG  
CTTCCGCTTTACCGAAAACCTTTCGCCCAAAGCAGGCGTGGCAGTCGGCCTTCTGTCGG  
TTCTTCCGCAGCCTACCATGTGCGGCTCAATTACGAGTGGTAA

>NEIS1969\_25

ATGAAACACTTTCCATCCAAAGTGTGACGCAGCCATCCTTGCCGCCCTCAGCGGCAGCG  
CAATGGCAGACAACGCCCCACCGCTGACGAAATTGCCAAAGCCGCCCTAGTTAACTCCT  
ACAACAATACCCAAGACATCAACGGATTACAGTTCGAGACACCATCTACGACATTAATA  
ATGACAAGATTACCAAAAAAGAAGCAACAGAACCCGATGTTGAAGCTGACGACTTTAAAG  
GTCTGGGTCTGAAAGAAGTCTGGCTCAACACGACCAAAGCCTTGCCGACCTGACCGAAA  
CCGTCAATGAAAACAGCGAAGCATTGGTAAAAACCGCCGCGGTTGTCAATGACATCAGTG  
CCGATGTCAAAGCCAACACAGCAGCTATCGGGGAAAACAAAGCTGCTATCGCTACAAAAG  
CAGACAAAACCGAACTGGATAAAGTGTCCGGCAAAGTAACCGAGAACGAGACTGCTATCG  
GTAAAAAAGCAAACAGTGCAGCTGTACTAAAGCTGAGGTGTACACCAAACAAGAGT  
CTGACAACAGATTTGTCAAAAATTAGTGACGGAATCGGTAATCTGAACACTACTGCCAATG  
GATTGGAGACACGCTTGGCCCTGCGGAACAAATCCGTTGACAGACCCGGTACGCGCTTGG  
CTTCTGCCGAAAATCCATTACCGAACACGGTACGCGCCTGAACGGTTTGGATAGAACAG  
TGTCAGACCTGCGTAAAGAAACCCGCCAAGGCCTTGCAGAAACAAGCCGCGCTCTCCGGTC  
TGTTCCAACCTTACAACGTGGGTGCGGTTCAATGTAACGGCTGCAGTCGGCGGCTACAAAT  
CCGAATCGGCAGTCGCCATCGGTACCGGCTTCCGCTTTACCGAAAACCTTTGCCGCCAAAG  
CAGGCGTGGCAGTCGGCACTTCGTCCGGTTCTTCCGCAGCCTACCATGTGCGGCTCAATT  
ACGAGTGGTAA

>NEIS1969\_27

ATGAAACACTTTCCATCCAAAGTACTGACCACAGCCATCCTTGCCACTTTCTGTAGCGGC  
GCACTGGCAGCCACAAGCGACGACGATGTTAAAAAAGCTGCCACTGTGGCCATTGTTGCT  
GCCTACAACAATGGCCAAGAAATCAACGGTTTCAAAGCTGGAGAGACCATCTACGACATT  
GGTGAAGACGGCACAATTACCCAAAAAGACGCAACTGCAGCCGATGTTGAAGCCGACGAC  
TTTAAAGGCTTGGGTCTGAAAAAAGTCTGACTAACCTGACCAAACCGTCAATGAAACC  
AAACAAAACGTCGATGCCAAAGTAAAGCTGCAGAACTGCAGCAGGCAAAGCCGAAGCT  
GCCGCTGGCAGCTAATACTGCAGCCGACAAGGCCGAAGCTGTGCTGCAAAAAGTTACC  
GACATCAAAGCTGATATCGCTACGAACAAAGCTGATATTGCTAAAAACTCAGCACGCATC  
GACAGCTTGGACAAAACGTAAGTAACTGCGCAAAGAAACCCGCCAAGGCTTGCAGAA  
CAAGCCGCGCTCTCCGGCTGTTCCAACCTTACAACGTGGGTGCGGTTCAATGTAACGGCT  
GCAGTCGGCGGCTACAAATCCGAATCGGCAGTCGCCATCGGTACCGGCTTCCGCTTTACC  
GAAAACCTTTGCCGCCAAAGCAGGCGTGGCAGTCGGCACTTCGTCCGGTTCTTCCGCAGCC  
TACCATGTGCGGCTCAATTACGAGTGGTAA

>NEIS1969\_29

ATGAAACACTTTCCATCCAAAGTACTGACCACAGCCATCCTTGCCACTTTCTGTAGCGGC  
GCACTGGCAGCCACAACGACGACGATGTTAAAAAAGCTGCCACTGTGGCCATTGCTGCT  
GCCTACAACAATGGCCAAGAAATCAACGGTTTCAAAGCTGGAGAGACCATCTACGACATT  
GATGAAGACGGCACAATTACCCAAAAAGACGCAACTGCAGCCGATGTTGAAGCCGACGAC  
TTTAAAGGCTTGGGTCTGAAAAAAGTCTGACTAACCTGACCAAACCGTCAATGAAACC  
AAACAAAACGTCGATGCCAAAGTAAAGCTGCAGAACTGCAGAACTGAAAATAGAAAAGTAA  
AAGTTAGCAGACACTGATGCCGCTTGGATGCAACCACCAACGCTTGAATAAATTGGGA  
GAAAATATAACGACATTTGCTGAAGAGACTAGGGCGTGTCTCAATTTAACTTAGCATGA

ATAATAGAGCAAGCCAAGTAAAGCATCGATTTAAAATTACGAGCTAATTTCTCATAGCGA  
GTAGCAATAC TACGAAACTGCTTTAATCGTGCAAATGCATCTCGACTAAGTGGCGTAAT  
TTATAAAGGTAGCTATCAAAATCAGGGTTAGGTTTCTTGGCATTTTTACGCTTTGGTATA  
ATAGCTTTTCATACCGTGTTCATFCGCTTTATCTCTGATTTCTTGGCAGTACATACCCTTG  
TCAGCGATAAAAATACTGGGCTTCTTGTATGACTTCTATCAAGTCGTTTGCAACTTGACCG  
TCGTGCACGTTACCCCCAGTGACTTTAAAAATCGAGCGGATTTCCATGCGAGTCCACACAT  
AGGTGTATTTTTGTGCTGTTTTCCGCCACGGCTTTGTCCAATTGCTCTATCGAAACCACGC  
CGAGCTCCACTTGCATGTTGATGACACCGTACATAAATTCCGTCGATGAATACCCATTCT  
TTGTCAATTTCTTTTCGTAGATCAAAAAAAATTTCTGCCACAAGCCTTTTTTAGACCATC  
GGTTAAAGCGGTTATAAGCGGTTTTCCATGACCCTAGCTCAATAGGTATGTCTCGCCATG  
GTGCACCTGTCTTAGCTTCCATAGTATGGCTTCCATCACGGTACGGTCTGTTCTTCCATT  
GATGACAGCCGTGCGCTTTTCATGTTTGTGTAATTGTTCCCATATGTTGTCAGTTATTG  
CGGTTCTCGCCATTGTTTGTGTTGCTTATATTTTCGTTGGAATATAGGGTTAAAATAGGG  
CTCTTTTGGGCTTATTCAAATTAGGGACACGCCCTAAGACAAAATATCGTAAAAATTTGATG  
AAAAATTAGAAGCGGTGGCTGATACCGTCGACAAGCATGCCGAAGCATTCAACGATATCG  
CCGATTCATTGGATGAAACCAACACTAAGGCAGACGAAGCCGTCAAACCCGCAATGAAG  
CCAAACAGACGGCCGAAGAAACCAAAACAAACGTCGATGCCAAAAGTAAAAGCTGCAGAAA  
CTGCCGCTGGCACAGCTAATACTGCAGCCGACAAGGCCGAAGCTGTGCTGCAAAAGTTA  
CCGACATCAAAGCTGATATCGCTACGAACAAAGATAATATGCTAAAAAAGCAAACAGTG  
CCGACGTGTACACCAGAGAAGAGTCTGACAGCAAATTTGTGAGAATTGATGGTCTGAACG  
TACTACCGAAAAAATTTGGACACAGCTTGGCTTCTGCCGAAAAATCCATTACCGAACAG  
GTACGCGCCTGAACCGTTTGGATGAACAGTGTGACACCTCGGTAAAGAAACCCGCAAG  
GCCTTGCAGAACAAAGCCGCGCTCTCCGGTCTGTTCCAACCTTACAACGTGGGTGCGTTCA  
ATGTAACGGCTGCAGTCGGCGCTACAAATCCGAATCGGCAGTCCGCTCGGTACCGGCT  
TCCGCTTTACCGAAAATTTGCCGCAAAGCAGGCGTGGCAGTCCGCACTTCGTCCGGTT  
CTTCCGCAGCCTACCATGTCCGGCTCAATTACGAGTGGTAA

>NEIS1969\_34

ATGAAACACTTTCAATCCAAAGTACTGACCGCAGCCATCCTTGCCGCCCTCAGCGGCAGC  
GCAATGGCAGACAACCCCCCCCCCTTCCACTGACGAAATTGCCAAAGCCGCCCTGGTTGG  
AGTCTACAACAATACCCAAGACATCAACGGATTCAAAGTCGGAGACACCATCTACGACAT  
TGAAAATGGCCAGCCTAAAGGAAGACCAGCAACAGAAGACGATGTTAAAGCCGATGACTT  
CGGCGGTCTGGGTCTGAAAGAAAGTCTTGGCTCAACACGACCAAAGCCTTGCCGACCTGAC  
CGGAACCGTCGAGGAAAACAGCGAAGCATTGGTGAAAACCCGCCGAGGTTGTCAATGACAT  
CAGTGCCGATGTCAAAGCCAAACAGCAGCTATCAGGGAAAACAAAGCTGCTATCGCTAC  
AAAAGCAGACAAAACCGAAGTGGATGAAGTGTCCGGCAAGGTAACCGCAAACGAGACTGC  
TATCGGTAAAAAAAGCAAACAGTGCAGCAGTGTACACTAAAGCTGAGGTGTACACCAAACA  
AGAGTCTGACAACAGATTTGTCAAATTTGGTGACAGAATCGGTAATCTGAACACTACTGC  
CAATGGATTGGAGACACCGCTTGGCCGATGCCGAAAAATCCGTTAAAGACCAGGTCACGG  
CTTGGCTTCTGCCGAAAAATCCATTACCGAACACGGTACGCGCCTGAACGGTTTGGATAG  
AACAGTGTGACACCTGCGCAAAGAAACCCGCAAGGCCCTTGCAAGAACAAGCCGCGCTCTC  
CGGCCTGTTCCAACCTTACAACGTGGGTGCGTTCAATGTACCGGCTGCAGTCGGCGGCTA  
CAAATCCGAATCGGCAGTCCGCATCGGTACCGGCTTCCGCTTTACCGAAAATTTGCCGC  
CAAAGCAGGCTGGCAGTCCGCACCTTCGTCCGGTTCTTCCGCAGCCTACCATGTCCGGCT  
CAATTACGAGTGGTAA

>NEIS1969\_35

ATGCAACACTTTCCATCCAAAGTACTGACCACAGCCATCCTTGCCACTTTCTGTAGCGGC  
GCACTGGCAGCCACAACGACGACGATGTTAAAAAAGCTGCCACTGTGGCCATTGTTGCT  
GCCTACAACAATGGCCAAAGAAATCAACGGTTTCAAAGCTGGAGAGACCATCTACGACATT  
GATGAAGACGGCACAATTACCAAAAAAGACGCAACTGCAGCCGATGTTGAAGCCGACGAC  
TTTAAAGGTCGTTGGTCTGAAAAAGTCTGACTAACCTGACCAAACCGTCAATGAAAAC  
AAACAAAACGTCGATGCCAAAGTAAAGCTGCAGAATCTGAAATAGAAAAGTTAAACAACC  
AAGTTAGCAGACACTGATGCCGCTTTAGCAGATACTGATGCCGCTCTGGATGCAACCACC  
AACGCCTTGAATAAATTTGGGAGAAAATATAACGACATTTGCTGAAGAGACTAAGACAAAT  
ATCGTAAAAAATGATGAAAAATTAGAAGCCGTGGCTGATACCGCTGCACAAGCATGCCGAA  
GCATTCAACGATATCGCCGATTCATTGGATGAAACCAACACTAAGGCAGACGAAGCCGTC  
AAAACCGCCAATGAAGCCAAAACAGACGGCCGAAGAAACCAAAACAAACGTCGATGCCAAA  
GTAAAAGCTGCAGAAACTGCAGCAGGCAAAGCCGAAGCTGCCGCTGGCACAGCTAATACT  
GCAGCCGACAAGGCGGAAGCTGTGCTGCAAAAAGTTACCGACATCAAAGCTGATATCGCT  
ACGAACAAAGCTGATATTGCTAAAAACTCAGCAGCATCGACAGCTTGGACAAAACGTA  
GCTAATCTGCCGCAAAGAAACCCGCAAGGCCCTTGCAAGAACAAGCCGCGCTCTCCGCGCTG  
TTCCAACCTTACAACGTGGGTGCGTTCAATGTAAACGGCTGCAGTCGGCGGCTACAAATCC  
GAATCGGCAGTCCGCATCGGTACCGGCTTCCGCTTTACCGAAAATTTGCCGCAAAGCA  
GGCGTGGCAGTCCGCACCTTCGTCCGGTTCTTCCGCAGCCTACCATGTCCGGCTCAATTAC  
GAGTGGTAA

>NEIS1969\_37

ATGAAACACTTTCAATCCAAAGTACTGACCGCAGCCATCCTTGCCCTCTTCTGTAGCGGC  
GCGCTGGCGGCATCGAACAGTAATGAGACCGAGGTCATCGACCACACGGCTCGAGAAGTT

GCCAAAGCCGCCCTGGTTGGAGCCTACAACAATACCCAAGAAATCAACGGTTTCAAAGTC  
GGAGACACCATCTACGACATTTGGTGAACACGGCAAAATTAACGAAAAAGAGCAACCTAA  
AAAGATGTGCGATAACGACGACTTTAAAGGTCTGGGTCTGAAAGAAGTCTGGCTCAACAC  
GACCAAAGCCTTGCCGACCTGACCGAACCCGTCAATGAAAACAGCGAAGCATTGGTAAAA  
ACTGCCGAAGTTGTCAATGAAATCAGTGCCGATGTAAAAGCCAACACGGCAGCTATCAGG  
GAAAACAAAGCTGCTATCGCCAAAAGGCAGATCAAACCGCATTGGATGCAGTATCCGAA  
AAGGTAACCGCAAATGAAACTGCTATCGCTACAAAAGCAGACAAAACCGAACTGGATAAA  
GTGTCTGGCAAAGTAACCGCGAACGAGTCTGCTATCGGTAAAAAAGCAAACAGTGGCCGAC  
GTGTACACTAAAGCTGAGGTGTACACCAAACAAGAGTCTGACAACAGATTTGTCAAATTT  
GGTGACAGAATCGGTAATCTGAACACTACTGCCGATGGATGGATACACGCTTGAAGACT  
GCCGAAAAAACCATACCGAACACGGTACGCGCCTGGACGGCTTGGATAAAAACAGTGTCA  
AACCTGCGTAAAGAAACCCGCCAAGGCCTTGCAAGAACAGCCGCGCTCTCCGGCCTGTTC  
CAACCTTACAACGTTGGTCTGTTCAATGTAACGGCTGCAGTCGGCGGCTACAAATCCGAA  
TCGGCAGTCGCCATCGGTACCGGCTTCCGCTTTACCGAAAACTTTGCCGCAAAGCAGGC  
GTGGCAGTCGGCACTTCGTCCGGTTCTTCCGACGCTACCATGTGGCGTCAATTACGAG  
TGGTAA

>NEIS1969\_38

ATGAAACACTTTCAATCCAAAGTACTGACCGCAGCCATCCTTGCCGCCCTCAGCGGCAGC  
GCAATGGCAGACAACCCCCCCCCCTTCCACTGACGAAATTTGCCAAAGCCGCCCTGGTTG  
GAGTCTACAACAATACCCAAGACATCAACGGATTCAAAGTCGGAGACACCATCTACGACA  
TTGAAAATGGCCAGCTTAAAGGAAGACCAGCAACAGAAGACGATGTTAAAGCCGATGACT  
TCGGCGGTCTGGGTCTGAAAGAAGTCTTGGCTCAACACGACCAAAGCCTTGCCGACCTGA  
CCGGAACCGTCGAGGAAAACAGCGAAGCATTGGTGAACCGCCGAGGTTGTCAATGACA  
TCAGTGCCGATGTCAAAGCCAACACAGCAGCTATCAGGGAAAACAAAGCTGCTATCGCTA  
CAAAAGCAGACAAAACCGAACTGGATGAAGTGTCCGGCAAGGTAACCGCAAACGAGACTG  
CTATCGGTAAAAAGCAAACAGTGCAGCGTGTACACTAAAGCTGAGGTGTACACCAAAC  
AAGAGTCTGACAACAGATTTGTCAAATTTGGTGACAGAATCGGTAATCTGAACACTACTG  
CCAATGGATTGGAGACACGCTTGCCGATGCCGAAAAATCCGTTAAAGACCACGGTACGC  
GCTTGGCTTCTGCCGAAAAATCCATTACCGAACACGGTACGCGCCTGAACGGTTTGGATA  
GAACAGTGTGACACCTGCGCAAAGAAACCCGCCAAGGCCTTGCAAGAACAGCCGCGCTCT  
CCGGCTGTTCACCTTACAACGTTGGTTCGGTTCATGTAACGGCTGCAGTCGGCGGCT  
ACAAATCCGAATCGGCAGTCCGATCGGTAACCGGCTTCCGCTTTACCGAAAACTTTGCCG  
CCAAAGCAGGCGTGGCAGTCGGCACTTCGTCCGGTTCTTCCGACGCTACCATGTGGCG  
TCAATTACGAGTGGTAA

>NEIS1969\_39

ATGAAACACTTTCAATCCAAAGTACTGACCGCAGCCATCCTTGCCGCCCTCAGCGGCAGC  
GCAATGGCAGACAACCCCCCCCCCTTCCACTGACGAAATTTGCCAAAGCCGCCCTGGT  
TGGAGTCTACAACAATACCCAAGACATCAACGGATTCAAAGTCGGAGACACCATCTACGA  
CATTGAAAATGGCCAGCCTAAAGGAAGACCAGCAACAGAAGACGATGTTAAAGCCGATGA  
CTTCGGCGGTCTGGGTCTGAAAGAAGTCTTGGCTCAACACGACCAAAGCCTTGCCGACCT  
GACCGGAACCGTCGAGGAAAACAGCGAAGCATTGGTGAACCGCCGAGGTTGTCAATGA  
CATCAGTGCCGATGTCAAAGCAAACAGCAGCTATCAGGGAAAACAAAGCTGCTATCGTA  
TACAAAAGCAGACAAAACCGAACTGGATGAAGTGTCCGGCAAGGTAACCGCAAACGAGAC  
TGCTATCGGTAAAAAAGCAAACAGTGCAGCGTGTACACTAAAGCTGAGGTGTACACCAA  
ACAAGAGTCTGACAACAGATTTGTCAAATTTGGTGACAGAATCGGTAATCTGAACACTAC  
TGCCAATGGATTGGAGACACGCTTGCCGATGCCGAAAAATCCGTTAAAGACCACGGTAC  
CGCTTGGCTTCTGCCGAAAAATCCATTACCGAACACGGTACGCGCCTGAACGGTTTGGTA  
TAGAACAGTGTGACAGCTGCGCAAAGAAACCCGCCAAGGCCTTGCAAGAACAGCCGCGCT  
CTCCGGCCTGTTCACCTTACAACGTTGGTTCGGTTCATGTAACGGCTGCAGTCGGCGG  
CTACAAATCCGAATCGGCAGTCGCCATCGGTAACCGGCTTCCGCTTTACCGAAAACTTTGC  
CGCAAAGCAGGCGTGGCAGTCGGCACTTCGTCCGGTTCTTCCGACGCTACCATGTGGCG  
CGTCAATTACGAGTGGTAA

>NEIS1969\_40

ATGAAACACTTTCAATCCAAAGTACTGACCGCAGCCATCCTTGCCGCCCTCAGCGGCAGC  
GCAATGGCAGACAACCCCCCCCCCTTCCACTGACGAAATTTGCCAAAGCCGCCCTGGTGGAGT  
CTACAACAATACCCAAGACATCAACGGATTCAAAGTCGGAGACACCATCTACGACATTGA  
AAATGGCCAGCCTAAAGGAAGACCAGCAACAGAAGACGATGTTAAAGCCGATGACTTCCG  
CGGTCTGGGTCTGAAAGAAGTCTTGGCTCAACACGACCAAAGCCTTGCCGACCTGACCGG  
AACCGTCGAGGAAAACAGCGAAGCATTGGTGAACCGCCGAGGTTGTCAATGACATCAG  
TGCCGATGTCAAAGCCAACACAGCAGCTATCAGGGAAAACAAAGCTGCTATCGCTACAAA  
AGCAGACAAAACCGAACTGGATGAAGTGTCCGGCAAGGTAACCGCAAACGAGACTGCTAT  
CGGTAAAAAAGCAAACAGTGCAGCGTGTACACTAAAGCTGAGGTGTACACCAAACAAGA  
GTCTGACAACAGATTTGTCAAATTTGGTGACAGAATCGGTAATCTGAACACTACTGCCAA  
TGGATTGGAGACAGCTTGGCCGATGCCGAAAAATCCGTTAAAGACCACGGTACGCGCTT  
GGCTTCTGCCGAAAAATCCATTACCGAACACGGTACGCGCCTGAACGGTTTGGATAGAAC  
AGTGTGACACCTGCGCAAAGAAACCCGCCAAGGCCTTGCAAGAACAGCCGCGCTCTCCGG  
CCTGTTCACCTTACAACGTTGGTTCGGTTCATGTAACGGCTGCAGTCGGCGGCTACAA

ATCCGAATCGGCAGTCGCCATCGGTACCGGCTTCCGCTTTACCGAAAACCTTGCCGCCAA  
AGCAGGCGTGGCAGTCGGCACTTCGTCCGGTCTTCCGCAGCCTACCATGTCGGCGTCAA  
TTACGAGTGGTAA

>NEIS1969\_43

ATGAAACACTTTCAATCCAAAGTACTAACCAGCCATCCTTGCCCTTCTGTAGCGGC  
GCGCTGGCGGCAACAAACAGTATGAGACCGAGGTCATCGACCACATGGCTCGAGAAGTT  
GCCACAGCCGCCCTGGTTGGAGTCTACAACAATACCCAAGAAATCAACGGTTTCAAAGTC  
GGAGACACCATCTACGACATTGATGGAGACGGCAAAATACCCAAAAAAGCAACCCAAAG  
AAGATGTCGATAACGACGACTTTAAAGGTCTGGGTCTGAAAGAAGTCGCGGCTCTACACG  
ACCAAAGCCTTGCCGACCTGACCGGAATCGTCGAGGAAAACAGCGAAGCATTGGTAAAAA  
CCGCCAAGGTTGTCAATGACATCAGTGCCAAATGTCATTGACAACACAGCAGCTATCGGGG  
AAAACAAAGCTGCTATCGCCAAAAGGCAGATCAAACCGCATTGGATGCAGTATCCGACA  
AGGTAACCGCGAACGAGACTGCTATCGGTAATAAAGCAGACAAAACCGAACTGGATAAAG  
TGTCCGGCAAAGTAAACCGCAAACGAGACTGCTATCGCTACAAAAGCAGACAAAACCGAAC  
TGGATAAAGTGTCCGGCAAAGTAAACCGCAAACGAGACTGCTATCGCTACAAAAGCAAACA  
GTGCCGACGTGTACACTAAAGCTGAGGTGTACACCAAACAAGAGTCTGACAACAGATTTG  
TCAAAATTGGTGACAGAATCGGTAATCTGAACACTACTGCCGATGGATTGGATACACGCT  
TGAAGACTGCCGAAAAAACCTTACCGAACACGGTACGCGCTGGACGGCTTGGATAAAA  
CAGTGTCAAACCTGCGTAAAGAAAACCCGCCAAGGCCTTGCAGAACAAGCCGCGCTCTCCG  
GCCTTCCAACTTACAACGTCGGTTCGGTTCATGTAACGGCTGCAGTCGGCGGCTACA  
AATCCGAATCGGCAGTCGCCATCGGTACCGGCTTCCGCTTTACCGAAAACCTTGCCGCCA  
AAGCAGGCGTGGCAGTCGGCACTTCGTCCGGTCTTCCGCAGCCTACCATGTCGGCGTCA  
ATTACGAGTGGTAA

>NEIS1969\_44

ATGAAACACTTTCCATCCAAAGTACTGACCACAGCCATCCTTGCCACTTTCTGTAGCGGC  
GCACTGGCAGCCACAAGCGACGACGATGTTAAAAAAGCTGCCACTGTGGCCATTGTTGCT  
GCCTACAACAATGGCCAAGAAATCAACGGTTTCAAAGCTGGAGAGACCATCTACGACATT  
GGTGAAGACGGCACAATTACCCAAAAAGACGCAACTGCAGCCGATGTTGAAGCCGACGAC  
TTTAAAGGTCTGGGTCTGAAAAAAGTCTGACTAACCTGACCAAAAACCGTCAATGAAAAC  
AAACAAAACGTCGATGCCAAAGTAAAAGCTGCAGAATCTGAAATAGAAAAGTTAACAACC  
AAGTTAGCAGACACTGATGCCGCTTTAGCAGATACTGATGCCGCTCTGGATGAAACCACC  
AACGCCTTGAATAAATTTGGGATAAAAATATAACGACATTTGCTGAAGAGACTAAGACAAAT  
ATCGTAAAAATTGATGAAAAATTAGAAGCCGTGGCTGATACCGTCGACAAGCATGCCGAA  
GCATTCACGATATCGCCGATTCATTGGATGAAACCAACACTAAGGCAGACGAAGCCGTC  
AAAACCGCCAATGAAGCCAAACAGACGGCCGAAGAAAACCAAAAACCGTCGATGCCAAA  
GTAAAAGCTGCAGAAACTGCAGCAGGCAAAGCCGAAGCTGCCGCTGGCACAGCTAATACT  
GCAGCCGACAAGGCCGAAGCTGTGCTGCAAAAAGTTACCGACATCAAAGCTGATATCGCT  
ACGAACAAAGCTGATATTGCTAAAAACTCAGCAGCATCGACAGCTTGGACAAAAACGTA  
GCTAATCTGCGCAAAGAAACCCGCCAAGGCCTTGCAGAACAGCCGCGCTCTCCGGCCTG  
TTCCAACCTTACAACGTCGGTTCGGTTCAATGTAACGGCTGCAGTCGGCGGCTACAAATCC  
GAATCGGCAGTCGCCATCGGTACCGGCTTCCGCTTTACCGAAAACCTTGCCGCCAAAGCA  
GGCGTGGCAGTCGGCACTTCGTCCGGTCTTCCGCAGCCTACCATGTCGGCGTCAATTAC  
GAGTGGTAA

>NEIS1969\_45

ATGAAACACTTTCCATCCAAAGTACTGACCACAGCCATCCTTGCCACTTTCTGTAGCGGC  
GCACTGGCAGCCACAAGCGACGACGATGTTAAAAAAGCTGCCACTGTGGCCATTGTTGCT  
GCCTACAACAATGGCCAAGAAATCAACGGTTTCAAAGCTGGAGAGACCATCTACGACATT  
GGTGAAGACGGCACAATTACCCAAAAAGACGCAACTGCAGCCGATGTTGAAGCCGACGAC  
TTTAAAGGTCTGGGTCTGAAAAAAGTCTGACTAACCTGACCAAAAACCGTCAATGAAAAC  
AAACAAAACGTCGATGCCAAAGTAAAAGCTGCAGAATCTGAAATAGAAAAGTTAACAACC  
AAGTTAGCAGACACTGATGCCGCTTTAGCAGATACTGATGCCGCTCTGGATGAAACCACC  
AACGCCTTGAATAAATTTGGGAGAAAATATAACGACATTTGCTGAAGAGACTAAGACAAAT  
ATCGTAAAAATTGATGAAAAATTAGAAGCCGTGGCTGATACCGTCGACAAGCATGCCGAA  
GCATTCACGATATCGCCGATTCATTGGATGAAACCAACACTAAGGCAGACGAAGCCGTC  
AAAACCGCCAATGAAGCCAAACAGACGGCCGAAGAAAACCAAAAACCGTCGATGCCAAA  
GTAAAAGCTGCAGAAACTGCAGCAGGCAAAGCCGAAGCTGCCGCTGGCACAGCTAATACT  
GCAGCCGACAAGGCCGAAGCTGTGCTGCAAAAAGTTACCGACATCAAAGCTGATATCGCT  
ACGAACAAAGCTGATATTGCTAAAAACTCAGCAGCATCGACAGCTTGGACAAAAACGTA  
GCTAATCTGCGCAAAGAAACCCGCCAAGGCCTTGCAGAACAGCCGCGCTCTCCGGCCTG  
TTCCAACCTTACAACGTCGGTTCGGTTCAATGTAACGGCTGCAGTCGACGGCTACAAATCC  
GAATCGGCAGTCGCCATCGGTACCGGCTTCCGCTTTACCGAAAACCTTGCCGCCAAAGCA  
GGCGTGGCAGTCGGCACTTCGTCCGGTCTTCCGCAGCCTACCATGTCGGCGTCAATTAC  
GAGTGGTAA

>NEIS1969\_46

ATGAAACACTTTCAATCCAAAGTACTGACCAGCCATCCTTGCCGCCCTCAGCGGCAGC  
GCAATGGCAGACAACCCCCCTTCCACTGACGAAATTGCCAAAGCCGCCCTAGTTAACT

CCTACAACAATACCCAAGACATCAACGGTTTCAAAGTCGGAGACACCATCTACGACATTA  
ATGGAACCGGCAAAATTACCAAGAAAACAGCAACAGAAGACGATGTTAAAGCCGATGACT  
TCGGCGGTTTGGGTCTGAAAGAAAGTCTTGGCTCAACACGACCAAAGCCTTGCCGACCTGA  
CCGGAACCCGTCGATGAAAACAGCGAAGCATTGGTAAAAACCGCCGAGGTTGTCAATGACA  
TCAGTGCCGATGTCAAAGCCAACACGGCAGCTATCGGGGAAAAACAAAGCTGCTATCGCCA  
AAAAGGCAGATCAAACCGCATTGGATGCAGTATCCGAAAAGGTAACCGCGAACGAGACTG  
CTATCGGTAAAAAGCAAACAGTGCCGACGTTACACTAAAGCTGAGGTGTACACCAAAC  
AAGAGTCTGACAACAGATTTGTCAAAATTTGGTGACAGAATCGGTAATCTGAACACTACTG  
CCAATGGATTGGAGACACGCTTGGCCGATGCCGAAAAATCCGTTGCAGACCACGGTACGC  
GCTTGGCTTCTGCCGAAAAATCCATTACCGAACACGGTACGCGCCTGAACGGTTTGGATA  
GAACAGTGTGACAGCTGCGTAAAGAAAACCCGCCAAGGCCTTGCAGAACAAGCCGCGCTCT  
CCGGCCTGTTCCAACCTTACAACGTGGGTCCGTTCAATGTAACGGCTGCAGTCCGGCGCT  
ACAAATCCGAATCGGCAGTCCGATCGGTACCGGCTTCCGCTTTACCGAAAACCTTTGCCG  
CCAAAGCAGGCGTGGCAGTCCGCACTTCGTCCGGTTCTTCCGCAGCCTACCATGTGGCG  
TCAATTACGAGTGGTAA

>NEIS1969\_47

ATGAAACACTTTCCATCCAAAGTACTGACCACAGCCATCCTTGCCACTTTCTGTAGCGGC  
GCACTGGCAGCCACAAGCGACGACGATGTTAAAAAAGCTGCCACTGTGGCCATTGTTGCT  
GCCTACAACAATGGCCAAGAAATCAACGGTTTCAAAGCTGGAGAGACCATCTACGACATT  
GGTGAAGACGGCACAATTACCCAAAAAGACGCAACTGCAGCCGATGTTGAAGCCGACGAC  
TTTAAAGGTCCTGGGTCTGAAAAAAGTTCGTGACTAACCTGACCAAAACCGTCAATGAAAAC  
AAACAAAACGTCGATGCCAAAGTAAAAGCTGCAGAATCTGAAATAGAAAAGTTAAACAACC  
AAGTTAGCAGACACTGATGCCGCTTTAACAGATACTGATGCCGCTCTGGATGAAACCACC  
AACGCCTTGAATAAATTTGGGAGAAAATATAACGACATTTGCTGAAGAGACTAAGACAAAT  
ATCGTAAAAAATTGATGAAAAATTAGAAGCCGTGGCTGATACCGTCGACAAGCATGCCGAA  
GCATTCACGATATCGCCGATTCATTGGATGAAACCAACACTAAGGCAGACGAAGCCGTC  
AAAACCGCCAATGAAGCCAAAACAGACGGCCGAAGAAAACCAACAAAACGTCGATGCCAAA  
GTAAGCTGCAGAACTGCAGCAGGCAAAGCCGAAGCTGCCGCTGGCACAGCTAATACT  
GCAGCCGACAAGGCCGAAGCTGTCGCTGCAAAAAGTTACCGACATCAAAGCTGATATCGCT  
ACGAACAAAGCTGATATTGCTAAAAACTCAGCACGCATCGACAGCTTGGACAAAAACGTA  
GCTAATCTGCGCAAAGAAACCCGCAAGGCCTTGCAGAACAAGCCGCGCTCTCCGGCCTG  
TTCCAACCTTACAACGTGGGTCCGGTTCAATGTAACGGCTGCAGTCCGGCGGTACAAATCC  
GAATCGGCAGTCCGCATCGGTACCGGCTTCCGCTTTACCGAAAACCTTTGCCGCCAAAGCA  
GGCGTGGCAGTCCGCACTTCGTCCGGTTCTTCCGCAGCCTACCATGTCCGGCTCAATTAC  
GAGTGGTAA

>NEIS1969\_48

ATGAAACACTTTCCATCCAAAGTACTGACCACAGCCATCCTTGCCACTTTCTGTAGCGGC  
GCACTGGCAGCCACAAGCGACGACGATGTTAAAAAAGCTGCCACTGTGGCCATTGTTGCT  
GCCTACAACAATGGCCAAGAAATCAACGGTTTCAAAGCTGGAGAGACCATCTACGACATT  
GGTGAAGACGGCACAATTACCCAAAAAGACGCAACTGCAGCCGATGTTGAAGCCGACGAC  
TTTAAAGGTCCTGGGTCTGAAAAAAGTTCGTGACTAACCTGACCAAAACCGTCAATGAAAAC  
AAACAAAACGTCGATGCCAAAGTAAAAGCTGCAGAATCTGAAATAGAAAAGTTAAACAACC  
AAGTTAGCAGACACTGATGCCGCTTTAGCAGATACTGATGCCGCTCTGGATGAAACCACC  
AACGCCTTGAATAAATTTGGGAGAAAATATAACGACATTTACTGAAGAGACTAAGACAAAT  
ATCGTAAAAAATTGATGAAAAATTAGAAGCCGTGGCTGATACCGTCGACAAGCATGCCGAA  
GCATTCACGATATCGCCGATTCATTGGATGAAACCAACACTAAGGCAGACGAAGCCGTC  
AAAACCGCCAATGAAGCCAAAACAGACGGCCGAAGAAAACCAACAAAACGTCGATGCCAAA  
GTAAGCTGCAGAACTGCAGCAACTGCAGCAGGCAAAGCCGAAGCTGCCGCTGGCACAGCTAATACT  
GCAGCCGACAAGGCCGAAGCTGTCGCTGCAAAAAGTTACCGACATCAAAGCTGATATCGCT  
ACGAACAAAGCTGATATTGCTAAAAACTCAGCACGCATCGACAGCTTGGACAAAAACGTA  
GCTAATCTGCGCAAAGAAACCCGCAAGGCCTTGCAGAACAAGCCGCGCTCTCCGGCCTG  
TTCCAACCTTACAACGTGGGTCCGGTTCAATGTAACGGCTGCAGTCCGGCGGTACAAATCC  
GAATCGGCAGTCCGCATCGGTACCGGCTTCCGCTTTACCGAAAACCTTTGCCGCCAAAGCA  
GGCGTGGCAGTCCGCACTTCGTCCGGTTCTTCCGCAGCCTACCATGTCCGGCTCAATTAC  
GAGTGGTAA

>NEIS1969\_49

ATGAAACACTTTCCATCCAAAGTACTGACCACAGCCATCCTTGCCACTTTCTGTAGCGGC  
GCACTGGCAGCCACAAGCGACGACGATGTTAAAAAAGCTGCCACTGTGGCCATTGTTGCT  
GCCTACAACAATGGCCAAGAAATCAACGGTTTCAAAGCTGGAGAGACCATCTACGACATT  
GGTGAAGACGGCACAATTACCCAAAAAGACGCAACTGCAGCCGATGTTGAAGCCGACGAC  
TTTAAAGGTCCTGGGTCTGAAAAAAGTTCGTGACTAACCTGACCAAAACCGTCAATGAAAAC  
AAACAAAACGTCGATGCCAAAGTAAAAGCTGCAGAACTGCAGCAGGCAAAGCCGAAGCT  
GCCGCTGGCACAGCTAATACTGCAGCCGACAAGGCCGAAGCTGTCGCTGCAAAAAGTTACC  
GACATAAAGCTGATATCGCTACGAACAAGCTGATATTGCTAAAAACTCAGCACGCATC  
GACAGCTTGGACAAAACGTAAGCTAATCTGCGCAAAGAAAACCCGCCAAGGCCTTGCAGAA  
CAAGCCGCGCTCTCCGGCCTGTTCCAACCTTACAACGTGGGTCCGGTTCAATGTAACGGCT  
GCAGTCCGGCGGTACAAATCCGAATCGGCAGTCCGCATCGGTACCGGCTTCCGCTTTACC

GAAAACCTTTGCCGCCAAAGCAGGCGTGGCAGTCGGCACTTCGTCCGGTCTTCCGCAGCC  
TACCATGTCCGGCTCAATTACGAGTGGTAA

>NEIS1969\_50

ATGAAACACTTTCCATCCAAAGTACTGACCACAGCCATCCTTGCCACTTTCTGTAGCGGC  
GCACTGGCAGCCACAAACGACGACGATGTTAAAAAGCTGCCACTGTGGCCATTGCTGCT  
GCCTACAACAATGGCCAAGAAATCAACGGTTTCAAAGCTGGAGAGACCATCTACGACATT  
GATGAAGACGGCACAATTACCAAAAAAGACGCAACTGCAGCCGATGTTGAAGCCGACGAC  
TTTAAAGGTCTGGGTCTGAAAAAGTCTGACTAACCTGACCAAAACCGTCAATGAAAAAC  
AAACAAAACGTGATGCCAAAGTAAAAGCTGCAGAATCTGAAATAGAAAAGTTAACAACC  
AAGTTAGCAGACACTGATGCCGCTCTGGATGCAACCACCAACGCCCTTGAATAAATTGGGA  
GAAAATATAACGACATTTGCTGAAGAGACTAGGGCGTGTCTCAATTTAACTTAGCATGA  
ATAATAGAGCAAGCCAAGTAAAGCATCGATTTAAAATTACGAGCTAATTTCTCATAGCGA  
GTAGCAATACTACGAAACTGCTTTAATCGTGCAAATGCATTCTCGACTAAGTGGCGTAAT  
TTATAAAGGTAGCTATCAAAATCAGGGTTAGGTTTCTTGGCATTTTTACGCTTTGGTATA  
ATAGCTTTTCATACCGTGTTCATCGCTTTTATCTCTGATTTCTTGCGAGTCATACCCTTGG  
TCAGCGATAAAAATACTGGGCTTCTTGTATGACTTCTATCAAGTCCCTTGGCAACTTGACCG  
TCGTGCACGTTACCCCCAGTGACTTTAAAATCGAGCGGATTTCCATGCGAGTCCACACAT  
AGGTGTATTTTGTCTGTGTTCCGCCACGGCTTGTCCAATTGCTCTATCGAAACCACGC  
CGAGCTCCACTTGCATGTTGATGACACCGTACATAACTCCCGTCGATGAATACCCATTCT  
TTGTCAATTTCTTTTCGTAGATCAAAAAAAAATCTGCCACAAGCCTTTTTTAGACCATC  
GGTTAAAGCGGTATAAAGCGTTTTCCATGACCCTAGCTCAATAGGTATGTCTCGCCATG  
GTGCACCTGTCTTAGCTTCCATAGTATGGCTTCCATCACGGTACGGTCTGTTCTTCCATT  
GATGACAGCCGTGCGCTTTTCATGTTGTTTGTAAATTGTTCCCATATGTTGTCAGTTATTG  
CGGTTCTCGCCATTGTTTGTGTTTGCCTATATTTCTGTTGGAATATAGGGTAAAATAGGG  
CTCTTTTGGGCTTATTCAAATTAGGGACACGCCCTAAGACAAAATATCGTAAAAATTGATG  
AAAAATTAGAAGCCGTGGCTGATACCGTGCACAAGCATGCCGAAGCATTCAACGATATCG  
CCGATTCATTGGATGAAACCAACTAAGGCAGACGAAGCCGTCAAACCCCAATGAAG  
CCAAACAGACGGCCGAAGAAACCAAAACAAACGTCGATGCCAAAGTAAAAGCTGCAGAAA  
CTGCCGCTGGCAGACTAATCTGCAGCCGACAAGGCCGAGCTGTGCGTGCAAAAGTTA  
CCGACATCAAAGCTGATATCGCTACGAACAAAGATAATATTGCTAAAAAGCAAACAGTG  
CCGACGGTGGCAGCTGTACACCAGAGAAGAGTCTGACAGCAAATTTGTCAGAATTGAAG  
GTTCTGAACGCTACTACCGAAAAATTTGGACACACGCTTGGCTTCTGCCGAAAAATCCATT  
ACCGAACACGGTACGCGCTGAACGGTTTGGATAGAACAGTGTGACACCTGCGTAAAGAA  
ACCCGCCAAGGCCTTGAGAACAAAGCCGCTCTCCGGTCTGTTCCAACCTTACAACGTG  
GGTCCGTTCAATGTAACGGCTGCAGTCGGCGCTACAAATCCGAATCGGCAGTCGCCATC  
GGTACCGGCTTCCGCTTTACCGAAAACTTTGCCGCCAAAGCAGGCGTGGCAGTCGGCACT  
TCGTCCGGTCTTCCGCAGCCTACCATGTCCGGCTCAATTACGAGTGGTAA

>NEIS1969\_52

ATGAAACACTTTCAATCCAAAGTACTGACCAGCCATCCTTGCCGCCCTCAGCGGCAGC  
GCAATGGCAGACAACCCCCCCCCCTTCCACTGACGAAATTGCCAAAGCCGCCCTGGTTGGA  
GTCTACAACAATACCAAGACATCAACGGATTCAAAGTCGGAGACACCATCTACGACATT  
GAAAATTGGCCAGCCTAAAGGAAGACCAGCAACAGAAGACGATGTTAAAGCCGATGACTTC  
GGCGGTCTGGGTCTGAAAGAAAGTCTTGGCTCAACACGACCAAAGCCTTGCCGACCTGACC  
GGAACCGTCGAGGAAAACAGCGAAGCATTTGGTAAAACCCGCGAGGTTGTCAATGACATC  
AGTGCCGATGTCAAAGCCAACACAGCAGCTATCAGGGAAAACAAAGCTGTATCGCTACA  
AAAGCAGACAAAACCGAAGTGGATGAAGTGTCCGGCAAGGTAACCGCAAACGAGACTGCT  
ATCGGTAAAAAAGCAAACAGTGGCCAGCTGTACACTAAAGCTGAGGTGTACACAAACAA  
GAGTCTGACAACAGATTTTGTCAAATTTGGTACAGAATCGGTAATCTGAACACTACTGCC  
AATGGATTGGAGACACGCTTGGCCGATGCCGAAAAATCCGTTAAAGACCACGGTACGCGC  
TTGGCTTCTGCCGAAAAATCCATTACCGAACACGGTACGCGCTGAACGGTTTGGATAGA  
ACAGTGTGACACCTGCGCAAAGAAACCCGCAAGGCCTTGAGAACAAAGCCGCGCTCTCC  
GGCCTGTTCCAACCTTACAACGTGGGTGCGTTCAATGTAACGGCTGCAGTCGGCGGCTAC  
AAATCCGAATCGGCAGTCGCCATCGGTACCGGCTTCCGCTTTACCGAAAACTTTGCCGCC  
AAAGCAGGCGTGGCAGTCGGCACTTCTGTCGGTCTTCCGCAGCCTACCATGTCCGGCGT  
AATTACGAGTGGTAA

>NEIS1969\_54

ATGAAACACTTTCCAATCCAAAGTACTGACCAGCCATCCTTGCTGCCCTCAGCGGCAGC  
GCAATGGCAGACAACCCCCCCCCCTTCCACTGACGAAATTGCCAAAGCCGCCCTAGTT  
AACTCCTACAACAATACCAAGACATCAACGGATTCAAAGTCGGAGACACCATCTACGAC  
ATTGAAAATGGCCAGCCTAAAGGAAGATCAGCAACAGAAGACGATGTTAAAGCCGATGAC  
TTCGGCGGTCTGGGTCTGAAAGAAGTCTGGCTCAACACGACCAAAGCCTTGCCGACCTG  
ACCGAAACCGTCAATGAAAACAGCGAAGCATTTGGTAAAAACCGCCGAAGTTGTCAATGAA  
ATCAGTACCGATGTCAAAGCCAACAAAGCGGCTATCACTACAAAAGCAGACAAAAGCCAAA  
CTGGATGAAGTGTCCGGCAAGGTAACCGCAACGAGACTGTATCGTACAAAAGCAAAC  
AGTGCCGACGTGTACACTAAAACCCAGTCTGACGAAAGATTTGTGAGAATTGATACAGC  
ATCGGTGGTCTGACCACTACTGCCGATGGATTGGATACACGCTTGAAGACTGCCGAAAA  
ACCATTACCGAACACGGTACGCGCTTGGCTTCTGCCGAAAAATCCATTACCGAACACGGT

ACGCGCCTGAACGGTTTGGATAGAACAGTGTGACACCTGCGCAAAGAAACCCGCCAAGGC  
CTTGCAGAACAAGCCGCGCTCTCCGGCCTGTCCAACCTTACAACGTGGGTGGTTCAAT  
GTAACGGCTGCAGTCGGCGGTACAAATCCGAATCGGCAGTCGCCATCGGTACCGGCTTC  
CGCTTTACCGAAAACCTTTCGCCCAAAGCAGGCGTGGCAGTCGGCACTTCGTCCGGTCT  
TCCGCAGCCTACCATGTTCGGCGTCAATTACGAGTGGTAA

>NEIS1969\_55

ATGAAACACTTTCCATCCAAAGTACTGACCACAGCCATCCTTGCCACTTTCTGTAGCGGC  
GCACTGGCAGCCACAAGCGACGACGATGTTAAAAAAGCTGCCACTGTGGCCATTGTTGCT  
GCCTACAACAATGGCCAAGAAATCAACGGTTTCAAAGCTGGAGAGACCATCTACGACATT  
GGTGAAGACGGCACAATTACCCAAAAAGACGCAACTGCAGCCGATGTTGAAGCCGACGAC  
TTTAAAGGTCTGGGTCTGAAAAAAGTCGTGACTAACCTGACCAAAACCGTCAATGAAAAC  
AAACAAAACGTCGATGCCAAAGTAAAAGCTGCAGAATCTGAAATAGAAAAGTTAAACAACC  
AAGTTAGCAGACACTGATGCCGCTTTAGCAGATACTGATGCCGCTCTGGATGAAACCACC  
AACGCCTTGAATAAATTGGGAGAAAAATATAACGACATTTGCTGAAGAGACTAAGACAAAT  
ATCGTAAAAAATTGATGAAAAATTAGAAGCCGTGGCTGATACCGTCGACAAGCATGCCGAA  
GCATTCAACGATATCGCCGATTCATTGGATGAAACCAACACTAAGGCAGACGAAAGCCGTC  
AAAACCGCCAATGAAGCCAAACAGACGGCCGAAGAAACCAAAACAAAACGTCGATGCCAAA  
GTAAAAGCTGCAGAAACTGCAGCAGGCAAAGCCGAAGCTGCCGCTGGCACAGCTAATACT  
GCAGCCGACAAGGCCGAAGCTGTGCTGCAAAAAGTTACCGACATCAAAGCTGATATCGCT  
ACGAACAAGCTGATATTGCTAAAAACTCAGCAGCATCGACAGCTTGGACAAAAACGTA  
CTAATCTGCGCAAGAAACCCGCAAGCCCTTGCAGAAACAGCCGCGCTCTCCGGCCTG  
TTCCAACCTTACAACATGGGTTCGTTCAATGTAACGGCTGCAGTCGGCGGTACAAATCC  
GAATCGGCAGTCGGCACTTCGTCCGGTCTTCCGCAGCCTACCATGTTCGGCGTCAATTAC  
GAGTGGTAA

>NEIS1969\_57

ATGAAACACTTTCAATCCAAAGTACTGACCAGCCATCCTTGCCCTCCTTCTGTAGCGGC  
GCGCTGGCGGCAACAAACAGTAATGAGACCGAGGTCATCGACCACACGGCTCGAGAAGTT  
GCCAAAGCCGCGCTGGTTGGATCCTACAACAAATGCCCAAGAAATCAACGGTTTCAAAGTC  
GGAGACACCACTCTACGACATTGATGAAAACGACAAAAATTACCAAAAAAAGCAACCCAAG  
AAGATGTCGATAACGACGACTTTAAAGGTCTGGGTCTGAAAGAAGTCTTGGCTCGACACG  
ACCAAAGCCTTGCCGACCTGACCGGAACCGTCGAGGAAAAACAGCGAAGCATGGTAAAAA  
CCGCCGAGGTTGTCAATGACATCAGTGCCGATGTCAAAGCCAACACAGCAGCTATCGGGG  
AAAACAAAGCTGCTATCGCTACAAAAGCAGACAAAACCGAACTGGATACAGTGTCCGGCA  
AAGTAACCGAGAACGAGACTGCTATCGGTAAAAAAGCAAACAGTGCAGCAGTGTACACTA  
AAGCTGAGGTGTACACCAACAAGAGTCTGACAACAGATTTGTCAAAATTAGTGACGGAA  
TCGGTAATCTGAACACTACTGCCAATGGATTGGAGACACGCTTGGCCGCTGCCGAACAAAT  
CCGTTGACAGACCAGGTACCGCTTGGCTTCTGCCAAAAATCCATTACCGAACACGATA  
CTCGCCTGAACGGTTTGGATAAAAACAGTGTGACACCTGCGCAAAGAAACCCGCCAAGGCC  
TTGCAGAACAAGCCGCGCTCTCCGGCCTGTTTCAACCTTACAACGTGGGTTCGTTCAATG  
TAACGGCTGCAGTCGGCGGTACAAATCCGAATCGGCAGTCGCCATCGGTACCGGCTTCC  
GCTTTACCGAAAACCTTTCGCCCAAAGCAGGCGTGGCAGTCGGCACTTCGTCCGGTCTT  
CCGCAGCCTACCATGTTCGGCGTCAATTACGAGTGGTAA

>NEIS1969\_58

ATGAAACACTTTCCATCCAAAGTACTGACCACAGCCATCCTTGCCACTTTCTGTAGCGGC  
GCACTGGCAGCCACAACGACGACGATGTTAAAAAAGCTGCCACTGTGGCCATTGCTGCT  
GCCTACAACAATGGCCAAGAAATCAACGGTTTCAAAGCTGGAGAGACCATCTACGACATT  
GATGAAGACGGCACAATTACCAAAAAAGACGCAACTGCAGCCGATGTTGAAGCCGACGAC  
TTTAAAGGTCTGGGTCTGAAAAAAGTCGTGACTAACCTGACCAAAACCGTCAATGAAAAC  
AAACAAAACGTCGATGCCAAAGTAAAAGCTGCAGAATCTGAAATAGAAAAGTTAAACAACC  
AAGTTAGCAGACACTGATGCCGCTCTGGATGCAACCACCAACGCTTGAATAAATTGGGA  
GAAAAATAACGACATTTGCTGAAGAGACTAAGACAAATATCGTAAAAAATTGATGAAAAAT  
TAGAAGCCGTGGCTGATACCGTCGACAAGCATGCCGAAGCATCAACGATATCGCCGATT  
CATTGGATGAAACCAACACTAAGGCAGACGAAAGCCGTCAAACCCGCAATGAAGCCAAAC  
AGACGGCCGAAGAAACCAACAAAACGTCGATGCCAAAGTAAAAGCTGCAGAAACTGCAG  
CAGGCAAAGCCGAAGCTGCCGCTGGCACAGCTAATACTGCAGCCGACAAGCCGAAGCTG  
TCGCTGCAAAAAGTTACCGACATCAAAGCTGATATCGCTACGAACAAAGATAATATTGCTA  
AAAAAGCAAACAGTGCAGCAGTGTACACCAGAGAAGAGTCTGCAGCAAAATTTGTCAGAA  
TTGATGGTCTGAACGCTACTACCGAAAAAATGGACACACGCTTGGCTTCTGCCGAAAAAT  
CCATTACCGAACACGGTACCGCCTGAACGGTTTGGATAGAACAGTGTGACACCTGCGTA  
AAGAAACCCGCCAAGGCCCTTGCAGAACAAGCCGCGCTCTCCGGTCTGTTCCAACCTTACA  
ACGTGGGTTCGTTCAATGTAACGGCTGCAGTCGGCGGTACAAATCCGAATCGGCAGTCG  
CCATCGGTACCGGCTTCCGCTTTACCGAAAACCTTTCGCCCAAAGCAGGCGTGGCAGTCG  
GCACTTCGTCCGGTCTTCCGCAGCCTACCATGTTCGGCGTCAATTACGAGTGGTAA

>NEIS1969\_59

ATGAAACACTTTCAATCCAAAGTACTGGCCGACGACGATGTTAAAAAAGCTGCCACTGTGGCCATTGCTGCT  
GCACTGGCAGCCACAACGACGACGATGTTAAAAAAGCTGCCACTGTGGCCATTGCTGCT

GCCTACAACAATGGCCAAGAAATCAACGGTTTCAAAGCTGGAGAGACCATCTACGACATT  
GATGAAGACGGCACAATTACCAAAAAAGACGCAACTGCAGCCGATGTTGAAGCCGACGAC  
TTTAAAGGCTGGGTCTGAAAAAGTCTGACTAACCTGACCAAAACCGTCAATGAAAA  
AAACAAAACGTCGATGCCAAAGTAAAAGCTGCAGAATCTGAAATAGAAAAGTTAACCAACC  
AAGTTAGCAGACACTGATGCCGCTCTGGATGCAACCACCAACGCTTGAATAAAATTGGGA  
GAAAATATAACGACATTTGCTGAAGAGACTAAGACAAATATCGTAAAAAATTGATGAAAA  
TTAGAAGCCGTGGCTGATACCGTGCACAAGCATGCCGAAGCATTCAACGATATCGCCGAT  
TCATTGGATGAAACCAACACTAAGGCAGACGAAGCCGTCAAACCCGCCAATGAAGCCAAA  
CAGACGGCCGAAGAAACCAACAAAACGTCGATGCCAAAGTAAAAGCTGCAGAAACTGCA  
GCAGGCAAAGCCGAAGCTGCCGCTGGCACAGCTAATACCTGCAGCCGACAAGGCCGAAGCT  
GTCGCTGCAAAAAGTTACCGACATCAAAGCTGATATCGCTACGAACAAAGATAATATTGCT  
AAAAAAGCAAACAGTGCCGACGTGTACACCAGAGAAGAGTCTGACAGCAAATTTGTCAGA  
ATTGATGGTCTGAACGCTACTACCGAAAAATTTGGACACACGCTTGGCTTCTGCCGAAAA  
TCCATTACCGAACACGGTACGCGCCTGAACGGTTTGGATAGAACAGTGTGACAGCCTGCGT  
AAAGAAACCCGCCAAGGCCTTGCAAGCAAGCCGCGCTCTCCGGTCTGTTCCAACCTTAC  
AACGTGGGTCCGTTCAATGTAACGGCTGCAGTCCGGCGCTACAAATCCGAATCGGCAGTC  
GCCATCGGTACCGGCTTCCGCTTTACCGAAAACTTTGCCGCCAAAGCAGGCGTGGCAGTC  
GGCACTTCGTCGGTTCTTCCGACGCTACCATGTCCGGCTCAATTACGAGTGGTAA

>NEIS1969\_60

ATGAAACACTTTCAATCCAAAGTACTGACCGCAGCCATCCTTGCCCTCCTTCTGTAGCGGC  
GCGCTGGCGGCATCAAACAGTGATGAGACCGAGGTGCGCTCGAGAAGTTGCCACAGCCGCC  
CTGGTTGGAGCCTACAACAATGCCAAGAAATCAACGGTTTCAAAGTCCGAGACACCATCT  
ACGACATTAATGGAAGCGGCGAAATTACCCCAAAGAAGCAACCCAAGAAGATGTCGATA  
ACGACGACTTTAAAGGTCTGGGTCTGAAAGAAGTCTGGCTCAACACGACCAAAAGCCTTG  
CCGACCTGACCGGAATCGTCGAGGAAAACAGCGAAGCATTGGTAAAAACCCCAAGGTTG  
TCAATGACATCAGTGCCGATGTCATTGACAAACACAGCAGCTATCGGGGAAAACAAAGCTG  
CTATCGCCAAAAAGGCAGATCAAACCGCATTTGGATGCAGTATCCGAAAAGGTAACCGCAA  
ATGAAACTGCTATCGCTACAAAAGCAGACAAAACCGAAGTGGATAAAGTGTCCGGCAAAG  
TAACCGCAAACGAGACTGCTATCGCTACAAAAGCAGACAAAACCGAAGTGGATAAAGTGT  
CCGGCAAAGTAAACCGCAAACGAGACTGCTATCGCTACAAAAGCAAACAGTCCCGACGCTG  
ACACTAAAGCTGAGGTGTACACCAAACAAGAGTCTGACAACAGATTTGTCAAATTTGGTG  
ACAGAATCCGTTAATCTGAACACTACTGCCGATGGATTGGATACACGCTTGAAGACTGCCG  
AAAAAACCATTACCGAACACGGTACGCGCCTGGACGGCTTGGATAAAAACAGTGTCAAACC  
TGCGTAAAGAAAACCCGCCAAGGCCTTGCAAGCAAGCCGCGCTCTCCGGCTGTTCCAAC  
CTTACAACGTGGGTCCGTTCAATGTAACGGCTGCAGTCCGGCGCTACAAATCCGAATCGG  
CAGTCCGCATCCGGTACCGGCTTCCGCTTTACCGAAAACTTTGCCGCCAAAGCAGGCGTGG  
CAGTCCGCATTCGTCGGTTCTTCCGACGCTACCATGTCCGGCTCAATTACGAGTGGT  
AA

>NEIS1969\_61

ATGAAACACTTTCAATCCAAAGTACTGACCGCAGCCATCCTTGCCGCCCTCAGCGGCAGC  
GCAATGGCAGACACCCCCCCTTCCACTGACGAAATTGCCAAAGCCGCCCTGGTTGG  
AGTCTACAACAATACCCAAGACATCAACGGATTCAAAGTCCGAGACACCATCTACGACAT  
TGAAAATGGCCAGCCTAAAGGAAGACCAGCAACAGAAGACGATGTTAAAGCCGATGACTT  
CGGCGGTCTGGGTCTGAAAGAAGTCTTGGCTCAACACGACCAAAGCCTTGCCGACCTGAC  
CGGAACCGTCCGAGAAAACAGCGAAGCATTGGTGAAAACCCGCCGAGGTTGTCAATGACAT  
CAGTCCGATGTCAAAGCCAAACACAGCAGCTATCAGGGAAAACAAAGCTGCTATCGCTAC  
AAAAGCAGACAAAACCGAAGTGGATGAAGTGTCCGGCAAGGTAACCGCAAACGAGACTGC  
TATCGGTAAAAAAGCAAACAGTCCCGACGTGTACACTAAAGCTGAGGTGTACACCAAACA  
AGAGTCTGACAACAGATTTGTCAAATTTGGTGACAGAATCGGTAATCTGAACACTACTGC  
CAATGGATTGGAGACACGCTTGGCCGATGCCGAAAAATCCGTTAAAGACCACGGTACGG  
CTTGGCTTCTGCCGAAAAATCCATTACCGAACACGGTACGCGCCTGAACGGTTTGGATAG  
AACAGTGTGACAGCTGCGCAAAGAAAACCCGCCAAGGCCTTGCAAGAACAGCCGCGCTCTC  
CGGCTGTTCCAACCTTACAACGTGGGTCCGTTCAATGTAACGGCTGCAGTCCGGCGGCTA  
CAAATCCGAATCCGGCAGTCCGATCCGTTACCGGCTTCCGCTTTACCGAAAACTTTGCCGC  
CAAAGCAGGCGTGGCAGTCCGCACCTTCGTCGGTTCTTCCGACGCTACCATGTCCGGCT  
CAATTACGAGTGGTAA

>NEIS1969\_62

ATGAAACACTTTCAATCCAAAGTACTGACCGCAGCCATCCTTGCCGCCCTCAGCGGCAGC  
GCAATGGCAGACAACCCCCCCTTCCACTGACGAAATTGCCAAAGCCGCCCTGGTTGGAG  
TCTACAACAATACCCAAGACATCAACGGATTCAAAGTCCGAAAACACCATCTACGACATTG  
AAAATGGCCAGCCTAAAGGAAGACCAGCAACAGAAGACGATGTTAAAGCCGATGACTTC  
GGCGGTCTGGGTCTGAAAGAAGTCTTGGCTCAACACGACCAAAGCCTTGCCGACCTGACC  
GGAACCCGTCGAGGAAAACAGCGAAGCATTGGTAAAACCCCGGAGGTTGTCAATGACATC  
AGTCCGATGTCAAAAGCCAAACACAGCAGCTATCAGGGAAAACAAAGCTGCTATCGCTACA  
AAAGCAGACAAAACCGAAGTGGATGAAGTGTCCGGCAAAGGTAACCGCAAACGAGACTGCT  
ATCGGTAAAAAAGCAAACAGTCCGACGCTGTACACTAAAGCTGAGGTGTACACCAAACA  
GAGTCTGACAACAGATTTGTCAAATTTGGTGACAGAATCGGTAATCTGAACACTACTGCC

AATGGATTGGAGACACGCTTGGCCGATGCCGAAAAATCCGTTAAAGACCACGGTACGCGC  
TTGGTTTTCTGCCGAAAAATCCATTACCGAACACGGTACGCGCCTGAACGGTTTGATAGA  
ACAGTGTACAGCTGCGCAAGAAAAACCGCAAGGCCTTGAGAACAAAGCCGCGCTCTCC  
GGCCTGTTCCAACTTACAACGTGGGTCCGTTCAATGTAAACGGTGCAGTGGCGGCTAC  
AAATCTGAATCCGGCAGTCCGCATCGGTACCGGGTTCCGCTTACCGAAAACTTCGCGGCC  
AAAGCAGGCGTGGCAGTCCGCACTTCGTCCGGTTTTTTTCGCAGCCTACCATGTGGCGTC  
AATTACGAGTGGTAA

>NEIS1969\_63

ATGAAACACTTTCCATCCAAAGTACTGACCACAGCCATCCTTGCCACTTTCTGTAGCGGC  
GCACTGGCAGCCACAAGCGACGACGATGTTAAAAAAGCTGCCACTGTGGCCATTGTTGCT  
GCCTACAACAATGGCCAAGAAATCAACGGTTTTCAAAGCTGGAGAGACCATCTACGACATT  
GGTGAAGACGGCACAATTACCCAAAAAGACGCAACTGCAGCCGATGTTGAAGCCGACGAC  
TTTAAAGGTCTGGGTCTGAAAAAAGTTCGTGACTAACCTGACAAAAACCGTCAATGAAAAC  
AAACAAAACGTCGATGCCAAAGTAAAAGCTGCAGAATCTGAAATAGAAAAGTTAAACAACC  
AAGTTAGCAGACACTGATGCCGCTTTAGCAGATACTGATGCCGCTCTGGATGAAACCACC  
AACGCCTTGAATAAATTTGGGAGAAAAATATAACGACATTTGCTGAAGAGACTAAGACAAAT  
ATCGTAAAAATTGATGAAAAATTAGAAGCCGTGGCTGATACCGTCGACAAGCATGCCGAA  
GCATTC AACGATATCGCCGATTCATTGGATGAAACCAACACTAAGGCAGACGAAGCCGTC  
AAAACCGCCAAGGCCTTGAGAACAAAGCCGCGCTCTCCGGCCTGTTCCAACCTTACAACG  
TGGGTCCGTTCAATGTAAACGGTGCAGTCCGCGGTACAAATCCGAATCGGCAGTCCGCCA  
TCGGTACCGGCTTCCGCTTTACCGAAAAACTTTGCCGCCAAAGCAGGCGTGGCAGTCCGCCA  
CTTCGTCCGGTTCTTCCGCAGCCTACCATGTGGCGTCAATTACGAGTGGTAA

>NEIS1969\_65

ATGAAACACTTTCCATCCAAAGTACTGACCACAGCCATCCTTGCCACTTTCTGTAGCGGC  
GCACTGGCAGCCACAAGCGACGACGATGTTAAAAAAGCTGCCACTGTGGCCATTGCTGCT  
GCCTACAACAATGGCCAAGAAATCAACGGTTTTCAAAGCTGGAGAGACCATCTACGACATT  
GATGAAGACGGCACAATTACCCAAAAAGACGCAACTGCAGCCGATGTTGAAGCCGACGAC  
TTTAAAGGTCTGGGTCTGAAAAAAGTTCGTGACTAACCTGACAAAAACCGTCAATGAAAAC  
AAACAAAACGTCGATGCCAAAGTAAAAGCTGCAGAATCTGAAATAGAAAAGTTAAACAACC  
AAGTTAGCAGACACTGATGCCGCTTTAGCAGATACTGATGCCGCTCTGGATGCAACCACC  
AACGCCTTGAATAAATTTGGGAGAAAAATATAACGACATTTGCTGAAGAGACTAAGACAAAT  
ATCGTAAAAATTGATGAAAAATTAGAAGCCGTGGCTGATACCGTCGACAAGCATGCCGAA  
GCATTC AACGATATCGCCGATTCATTGGATGAAACCAACACTAAGGCAGACGAAGCCGTC  
AAAACCGCCAATGAAGCCAAACAGACGGCCGAAGAAACCAACAAAACGTCGATGCCAAA  
GTAAAAGCTGCAGAAACTGCAGCAGGCAAAGCCGAAGCTGCCGCTGGCACAGCTAATACT  
GCAGCCGACAAGGCCGAAGCTGTCGCTGCAAAAAGTTACCGACATCAAAGCTGATATCGCT  
ACGAACAAAGCTAATATTGCTAAAAAAGCAACAGTCCGACGCTGTACACCAGAGAAGAG  
TCTGACAGCAAATTTGTCAGAATTGATGGTCTGAACGCTACTACCGAAAAATTTGGACACA  
CGCTTGGCTTCTGCCGAAAAATCCATTACCGAACACGGTACGCGCCTGAACGGTTTTGGAT  
AGAACAGTGTGACACCTGCGTAAAGAAACCCGCCAAGGCCTTGCAGAACAGCCGCGCTC  
TCCGGTCTGTTCCAACCTTACAACGTGGGTCCGTTCAATGTAAACGGTGCAGTCCGCGGC  
TACAAATCCGAATCGGCAGTCCGCATCGGTACCGGCTTCCGCTTTACCGAAAACTTTGCC  
GCCAAAGCAGGCGTGGCAGTCCGCACTTCGTCCGGTTCTTCCGCAGCCTACCATGTCCGC  
GTCAATTATGAGTGGTAA

>NEIS1969\_66

ATGAAACACTTTCCATCCAAAGTACTGACCACAGCCATCCTTGCCACTTTCTGTAGCGGC  
GCACTGGCAGCCACAAGCGACGACGATGTTAAAAAAGCTGCCACTGTGGCCATTGTTGCT  
GCCTACAACAATGGCCAAGAAATCAACGGTTTTCAAAGCTGGAGAGACCATCTACGACATT  
GGTGAAGACGGCACAATTACCCAAAAAGACGCAACTGCAGCCGATGTTGAAGCCGACGAC  
TTTAAAGGTCTGGGTCTGAAAAAAGTTCGTGACTAACCTGACAAAAACCGTCAATGAAAAC  
AAACAAAACGTCGATGCCAAAGTAAAAGCTGCAGAATCTGAAATAGAAAAGTTAAACAACC  
AAGTTAGCAGACACTGATGCCCTTTAGCAGATACTGATGCCGCTCTGGATGAAACCACC  
AACGCCTTGAATAAATTTGGGAGAAAAATATAACGACATTTGCTGAAGAGACTAAGACAAAT  
ATCGTAAAAATTGATGAAAAATTAGAAGCCGTGGCTGATACCGTCGACAAGCATGCCGAA  
GCATTC AACGATATCGCCGATTCATTGGATGAAACCAACACTAAGGCAGACGAAGCCGTC  
AAAACCGCCAATGAAGCCAAACAGACGGCCGAAGAAACCAACAAAACGTCGATGCCAAA  
GTAAAAGCTGCAGAAACTGCAGCAGGCAAAGCCGAAGCTGCCGCTGGCACAGCTAATACT  
GCAGCCGACAAGGCCGAAGCTGTCGCTGCAAAAAGTTACCGACATCAAAGCTGATATCGCT  
ACGAACAAAGCTGATATTGCTAAAAAAGCAACAGTCCGACGCTGTGACAAAAACGTA  
GCTAATCTGCGCAAAGAAACCCGCCAAGGCCTTGAGAACAAAGCCGCGCTCTCCGGCCTG  
TTCCAACCTTACAACGTGGGTCCGTTCAATGTAAACGGTGCAGTCCGCGGTACAAATCC  
GAATCGGCAGTCCGCATCGGTACCGGCTTCCGCTTTACCGAAAACTTTGCCGCCAAAGCA  
GGCGTGGCAGTCCGCACTTCGTCCGGTTCTTCCGCAGCCTACCATGTCCGCGTCAATTAC  
GAGTGGTAA

>NEIS1969\_67

ATGAAACACTTTCAATCCAAAGTACTGACCACAGCCATCCTTGCCGCGCTCAGCGGCAGC

GCAATGGCAGACAACCCCCCCCCCTTCCACTGACGAAATTGCCAAAGCCGCCCTGGTTGG  
AGTCTACAACAATACCCAAGACATCAACGGATTCAAAGTCGGAGACACCATCTACGACAT  
TGAAAATGGCCAGCCTAAAGGAAGACCAGCAACAGAAGACGATGTTAAAGCCGATGACTT  
CGGCGGTCTAGGTCTGAAAGAAGTCTTGGCTCAACACGACCAAAGCCTTGCCGACCTGAC  
CGGAACCGTCGAGGAAAACAGCGAAGCATTGGTGAAAACCGCCGAGGTTGTCAATGACAT  
CAGTGCCGATGTCAAAGCCAACACAGCAGCTATCAGGGAAAACAAAGCTGCTATCGCTAC  
AAAAGCAGACAAAACCGAAGTGGATGAAGTGTCCGGCAAGGTAACCGCAAACGAGACTGC  
TATCGGTAATAAAGCAAACAGTGCCGACGTGTACACTAAAGCTGAGGTGTACACCAAACA  
AGAGTCTGACAACAGATTTGTCAAAAATTGGTGACAGAATCGGTAATCTGAACACTACTGC  
CAATGGATTGGAGACACGCTTGGCCGATGCCGAAAAATCCGTTAAAGACCACGGTACGCG  
CTTGGCTTCTGCCGAAAAATCCATTACCGAACACGGTACGCGCCTGAACGGTTTGGATAG  
AACAGTGTGACAGCTGCGCAAAGAAACCCGCCAAGGCCCTGCAGAACAAGCCGCGCTCTC  
CGGCTGTTCCAACCTTACAACGTGGGTGCGTTCAATGTAACGGCTGCAGTCGGCGGCTA  
CAAATCCGAATCGGCAGTCGGCATCGGTACCGGCTTCCGCTTTACCGAAAACCTTTGCCGC  
CAAAGCAGGCGTGGCAGTCGGCACTTCGTCCGGTTCTTCCGACGCTACCATGTCCGGCT  
CAATTACGAGTGGTAA

>NEIS1969\_68

ATGAAACACTTTCAATCCAAAGTACTGACCGCAGCCATCCTTGCCGCCCTCAGCGGCAGC  
GCAATGGCAGACAACCCCCCCCCCTTCCACGGACGAAATTGCCAAAGCCGCCCTGGTTGG  
AGTCTACAACAATACCCAAGACATCAACGGATTCAAAGTCGGAAACACCATCTACGACAT  
TGAAAATGGCCAGCCTAAAGGAAGACCAGCAACAGAAAACGATGTTAAAGCCGATGACTT  
CGGCGGTCTGGGTCTGAAAGAAGTCTTGGCTCAACACGACCAAAGCCTTGCCGACCTGAC  
CGGAACCGTCGAGGAAAACAGCGAAGCATTGGTGAAAACCGCCGAGGTTGTCAATGACAT  
CAGTGCCGATGTCAAAGCCAACACAGCAGCTATCAGGGAAAACAAAGCTGCTATCGCTAC  
AAAAGCAGACAAAACCGAAGTGGATGAAGTGTCCGGCAAGGTAACCGCAAACGAGACTGC  
TATCGGTAATAAAGCAAACAGTGCCGACGTGTACACTAAAGCTGAGGTGTACACCAAACA  
AGAGTCTGACAACAGATTTGTCAAAAATTGGTGACAGAATCGGTAATCTGAACACTACTGC  
CAATGGATTGGAGACACGCTTGGCCGATGCCGAAAAATCCGTTAAAGACCACGGTACGCG  
CTTGGCTTCTGCCGAAAAATCCATTACCGAACACGGTACGCGCCTGAACGGTTTGGATAG  
AACAGTGTGACAGCTGCGCAAAGAAACCCGCCAAGGCCCTGCAGAACAAGCCGCGCTCTC  
CGGCTGTTCCAACCTTACAACGTGGGTGCGTTCAATGTAACGGCTGCAGTCGGCGGCTA  
CAAATCCGAATCGGCAGTCGGCATCGGTACCGGCTTCCGCTTTACCGAAAACCTTTGCCGC  
CAAAGCAGGCGTGGCAGTCGGCACTTCGTCCGGTTCTTCCGACGCTACCATGTCCGGCT  
CAATTACGAGTGGTAA

>NEIS1969\_73

ATGAAACACTTTCCATCCAAAGTACTGACCACAGCCATCCTTGCCACTTTCTGTAGCGGC  
GCAATGGCAGCCCAAACAGCAGCAGATGTTAAAAAAGCTGCCACTGTGGCCATTGCTGCT  
GCCTACAACAATGGCCAAGAAATCAACGGTTTCAAAGCTGGAGAGACCATCTACGACATT  
GATGAAGACGGCACAATTACCAAAAAAGACGCAACTGCAGCCGATGTTGAAGCCGACGAC  
TTTAAAGGCTTGGGTCTGAAAAAAGTCTGACTAACCTGACCAAAACCGTCAATGAAAAC  
AAACAAAACGTCGATGCCAAAGTAAAAGCTGCAGAATCTGAAATAGAAAAGTTAAACAACC  
AAGTTAGCAGACACTGATGCCGCTTTAGCAGATACTGATGCCGCTCTGGATGCAACCACC  
AACGCCTTGAATAAAATTGGGAGAAAATATAACGACATTTGCTGAAGAGACTAACACAAAT  
ATCGTAAAAATTGATGAAAAATTAGAAGCCGTGGCTGATACCGTCGACAAGCATGCCGAA  
GCATTCACGATATCGCCGATTCATTGGATGAAACCAACACTAAGGCGGACGAAGCCGTC  
AAAACCGCCAATGAAGCCAAACAGACGGCCGAAGAAACCAAACAAACGTCGATGCCAAA  
GTAAAAGCTGCAGAACTGCAGCAGGCAAGCCGAAGCTGCCGCTGGCACAGCTAATACT  
GCAGCCGACAAGGCCAAGCTGTCTGCTGCAAAAAGTTACCGACATCAAAGCTGATATCGCT  
ACGAACAAAGATAATATTGCTAAAAAAGCAAAACAGTGCCGACGTGTACACCAGAGAAGAG  
TCTGACAGCAAATTTGTCAGAATTGATGGTCTGAACGCTACTACCGAAAAATTGGACACA  
CGCTTGGCTTCTGCTGAAAAATCCATTGCCGATCACGATACTCGCCTGAACGGTTTGGAT  
AAAACAGTGTGACAGCTGCGCAAAGAAACCCGCCAAGGCCCTGCAGAACAAGCCGCGCTC  
TCCGGTCTGTTCCAACCTTACAACGTGGGTGCGTTCAATGTAACGGCTGCAGTCGGCGGC  
TACAAATCCGAATCGGCAGTCGGCATCGGTACCGGCTTCCGCTTTACCGAAAACCTTTGCC  
GCCAAAGCAGGCGTGGCAGTCGGCACTTCGTCCGGTTCTTCCGACGCTACCATGTCCGGC  
GTCAATTACGAGTGGTAA

>NEIS1969\_74

ATGAAACACTTTCAATCCAAAGTACTGACCGCAGCCATCCTTGCCGCCCTCAGCGGCAGC  
GCAATGGCAGACAACCCCCCTTCCACTGACGAAATTGCCAAAGCCGCCCTAGTTAACTCC  
TACAACAATACCCAAGACATCAACGGTTTCAAAGTCGGAGACACCATCTACGACATTAAT  
GGAAACGGCAAATACCAGAAAAACAGCAACAGAAGACGATGTTAAAGCCGATGACTTC  
GGCGGTTTGGGTCTGAAAGAAGTCTTGGCTCAACACGACCAAAGCCTTGCCGACCTGACC  
GGAACCGTCGATGAAAACAGCGAAGCATTGGTAAAAACCGCCGAGGTTGTCAATGACATC  
AGTCCGATGTCAAAAGCCAACACGGCAGCTATCGGGGAAAACAAAGCTGCTATCGCCAAA  
AAGGCAGATCAAACCGCATTGGATGCAGTATCCGAAAAGGTAACCGCAAACGAGACTGCT  
ATCGGTAATAAAGCAAACAGTCCGACGTGTACACTAAAGCTGAGGTGTACACCAAACAA  
GAGTCTGACAACAGATTTGTCAAAAATTGGTGACAGAATCGGTAATCTGAACACTACTGCC

AATGGATTGGAGACACGCTTGCCGATGCCGAAAAATCCGTTGCAGACCACGGTACGCGC  
TTGGCTTCTGCCGAAAAATCCATTACCGAACACGGTACGCGCCTGAACGGTTTGGATAGA  
ACAGTGTTCAGACCTGCGTAAAGAAACCCGCCAAGGCCTTGACAGAACAGCCGCGCTCTCC  
GGCCTGTTCCAACTTACAACGTGGGTCGGTTCAATGTAAACGGTGCAGTGGGCGGTAC  
AAATCCGAATCGGCAGTCGCCATCGGTACCAGCTTCCGCTTTACCGAAAACTTTGCCGCC  
AAAGCAGGCGTGGCAGTGGCACTTCGTCCGGTTCTTCCGACGCTACCATGTGGCGTC  
AATTACGAGTGGTAA

>NEIS1969\_76

ATGAAACACTTTCCATCCAAAGTACTGACCACAGCCATCCTTGCCACTTTCTGTAGCGGC  
GCACTGGCAGCCACAAGCGCAGCAGATGTTAAAAAAGCTGCCACTGTGGCCATTGTTGCT  
GCCTACAACAATGGCCAAGAAATCAACGGTTTCAAAGCTGGAGAGACCATCTACGACATT  
GGTGAAGACGGCACAATTACCCAAAAAGACGCAACTGCAGCCGATGTTGAAGCCGACGAC  
TTTAAAGGTCTGGGTCTGAAAAAAGTCGTGACTAACCTGACAAAAACCGTCAATGAAAAC  
AAACAAAACGTGCATGCCAAAGTAAAAGCTGCAGAATCTGAAATAGAAAAGTTAACAACC  
AAGTTAGCAGACACTGATGCCGCTTTAGCAGATACTGATGCCGCTCTGGATGAAACCACC  
AACGCCTTGAATAAATTTGGGAGAAAATATAACGACATTTGCTGAAGAGACTAAGACAAAT  
ATCGTAAAAATTGATGAAAAATTAGAAGCCGTGGCTGATACCGTCGACAAGCATGCCGAA  
GCATTC AACGATATCGCCGATTCATTGGATGAAACCAACACTAAGGCAGACGAAGCCGTC  
AAAACCGCCAATGAAGCCAAACAGACGGCCGAAGAAACCAAAAACGTCGATGCCAAA  
GTAAAAGCTGCAGAAACTGCAGCAGGCAAAGCCGAAGCTGCCGCTGGCACAGCTAATACT  
GCAGCCGACAAGGCCGAAGCTGTCGCTGCAAAAAGTTACCGACATCAAAGCTGATATCGCT  
ACGAACAAAGCTGATATTGCTAAAAACTCAGCAGCATCGACAGCTTGGACAAAAACGTA  
GCTAATCTGCGCAAAGAAACCCGCCAAGGCCTTGCAGAACAAAGCCGCGCTCTCCGGCCTG  
TTCCAACCTTACAACGTGGGTTCGTTCAATGTAACGGCTGCAGTGGGCGGTACAAATCC  
GAATCGGCAGTCCGCTACAGCTTCCGCTTTACCGAAAACTTTGCCGCCAAAGCAG  
CGGTGGCAGTCGGCACTTCCGCTTCCGCTTCCGCGAGCTACCATGTCCGGCTCAATTACG  
AGTGGTAAGCAGCATCTCCCGATAAAGAAACCCGACGCCCTGCAAGGCTGCGGTTTTTATT  
TTCTATCCGGCCGTGACACTGCCGCTCCGAACGTTCCGCCGTGGGATACGGATTGCCT  
CCTCAACCGGCAGCACAAAAATCTTGGCGTCGCCGATTTTTCCCGAACGCGCCACCTCGA  
CAATCACGTCAATCGCGCGTTCCACAGCATCATCCGCCAACACCAGCTCGATTTTGA

>NEIS1969\_78

ATGAAACACTTTCCATCCAAAGTACTGACCACAGCCATCCTTGCCACTTTCTGTAGCGGC  
GCACTGGCAGCCACAAGCGCAGCAGATGTTAAAAAAGCTGCCACTGTGGCCATTGTTGCT  
GCCTACAACAATGGCCAAGAAATCAACGGTTTCAAAGCTGGAGAGACCATCTACGACATT  
GGTGAAGACGGCACAATTACCCAAAAAGACGCAACTGCAGCCGATGTTGAAGCCGACGAC  
TTTAAAGGTCTGGGTCTGAAAAAAGTCGTGACTAACCTGACAAAAACCGTCAATGAAAAC  
AAACAAAACGTTCGATGCCAAAGTAAAAGCTGCAGAATCTGAAATAGAAAAGTTAACAACC  
AAGTTAGCAGACACTGATGCCGCTTTAGCAGATACTGATGCCGCTCTGGATGAAACCACC  
AACGCCTTGAATAAATTTGGGAGAAAATATAACGACATTTGCTGAAGAGACTAAGACAAAT  
ATCGTAAAAATTGATGAAAAATTAGAAGCCGTGGCTGATACCGTCGACAAGCATGCCGAA  
GCATTC AACGATATCGCCGATTCATTGGATGAAACCAACACTAAGGCAGACGAAGCCGTC  
AAAACCGCCAATGAAGCCAAAACAGACGGCCGAAGAAACCAAAAACGTCGATGCCAAA  
GTAAAAGCTGCAGAAACTGCAGCAGGCAAAGCCGAAGCTGCCGCTGGCACAGCTAATACT  
GCAGCCGACAAGGCCGAAGCTGTCGCTGCAAAAAGTTACCGACATCAAAGCTGATATCGCT  
ACGAACAAAGCTGATATTGCTAAAAACTCAGCAGCATCGACAGCTTGGACAAAAACGTA  
GCTAATCTGCGCAAAGAAACCCGCCAAGGCCTTACAGAACAAAGCCGCGCTCTCCGGCCTG  
TTCCAACCTTACAACGTGGGTTCGTTCAATGTAACGGCTGCAGTGGGCGGTACAAATCC  
GAATCGGCAGTCCGCTACGCTACCGCTTCCGCTTTACCGAAAACTTTGCCGCCAAAGCA  
GGCGTGGCAGTCCGCACTTCGTCCGGTTCTTCCGCGAGCTACCATGTCCGGCTCAATTAC  
GAGTGGTAA

>NEIS1969\_80

ATGAAACACTTTCCATCCAAAGTACTGACCACAGCCATCCTTGCCACTTTCTGTAGCGGC  
GCACTGGCAGCCACAACGACGACGATGTTAAAAAAGCTGCCACTGTGGCCATTGCTGCT  
GCCTACAACAATGGCCAAGAAATCAACGGTTTCAAAGCTGGAGAGACCATCTACGACATT  
GATGAAGACGGCACAATTACCCAAAAAGACGCAACTGCAGCCGATGTTGAAGCCGACGAC  
TTTAAAGGTCTGGGTCTGAAAAAAGTCGTGACTAACCTGACAAAAACCGTCAATGAAAAC  
AAACAAAACGTTCGATGCCAAAGTAAAAGCTGCAGAATCTGAAATAGAAAAGTTAACAACC  
AAGTTAGCAGACACTGATGCCGCTTTAGCAGATACTGATGCCGCTCTGGATGCAACCACC  
AACGCCTTGAATAAATTTGGGAGAAAATATAACGACATTTGCTGAAGAGACTAAGACAAAT  
ATCGTAAAAATTGATGAAAAATTAGAAGCCGTGGCTGATACCGTCGACAAGCATGCCGAA  
GCATTC AACGATATCGCCGATTCATTGGATGAAACCAACACTAAGGCAGACGAAGCCGTC  
AAAACCGCCAATGAAGCCAAAACAGACGGCCGAAGAAACCAAAAACGTCGATGCCAAA  
GTAAAAGCTGCAGAAACTGCAGCAGGCAAAGCCGAAGCTGCCGCTGGCACAGCTAATACT  
GCAGCCGACAAGGCCGAAGCTGTCGCTGCAAAAAGTTACCGACATCAAAGCTGATATCGCT  
ACGAACAAAGATAAATATTGCTAAAAAAGCAACAGTGGCGACGTGTACCCAGAGAAGAG  
TCTGACAGCAAATTTGTCAGAATTGATGGTCTGAACGCTACTACCGAAAAATTTGGACACA  
CGCTTGGCTTCTGCTGAAAAATCCATTGCCGATCACGATACTCGCCTGAACGGTTTGGAT

AAAACAGTGTACAGCTGCGCAAAGAAACCCGCCAAGGCCTTGCAGAACAAGCCGCGCTC  
TCCGGTCTGTCCAACCTTACAACGTGGGTTCGTTCAATGTAACGGCTGCAGTCGGCGGC  
TACAAATCCGAATCGGCAGTCGCCATCGGTACCGGCTTCCGCTTTACCGAAAACCTTTGCC  
GCCAAAGCAGGCGTGGCAGTCGGCACTTCGTCCGGTCTTCTGCAGCCTACCATGTCCGGC  
GTCAATTACGAGTGGTAA

>NEIS1969\_81

ATGAAACACTTTCCATCCAAAGTACTGACCACAGCCATCCTTGCCACTTTCTGTAGCGGC  
GCACTGGCAGCCACAAACGACGACGATGTTAAAAAAGCTGCCACTGTGGCCATTGCTGCT  
GCCTACAACAATGGCCAAGAAATCAACGGTTTCAAAGCTGGAGAGACCATCTACGACATT  
GATGAAGACGGCACAATTACCAAAAAAGACGCAACTGCAGCCGATGTTGAAGCCGACGAC  
TTTAAAGGTCTGGGTCTGAAAAAAGTCGTGACTAACCTGACCAAAACCGTCAATGAAAAC  
AAACAAAACGTCGATGCCAAAGTAAAAGCTGCAGAACTGCAGCAGGCAAAGCCGAAGCT  
GCCGCTGGCAGCTAATACTGCAGCCGACAAGGCCGAAGCTGTGCTGCAAAAAGTTACC  
GACATCAAAGCTGATATCGCTACGAACAAAGATAATATTGCTAAAAAAGCAAAACAGTGCC  
GACGTGTACACCAGAGAAGAGTCTGCAGCAAAATTTGTGCAAAATGATGGTCTGAACGCT  
ACTACCGAAAAAATTGGACACACGCTTGGCTTCTGCTGAAAAATCCATTGCCGATCACGAT  
ACTCGCCTGAACGGTTTGGATAAAACAGTGTGACACCTGCGCAAAGAAACCCGCCAAGGC  
CTTGCAGAACAGCCGCGCTTCCGGTCTGTTCCAACCTTACAACGTGGGTCCGGTTCAAT  
GTAACGGCTGCAGTCGGCGGCTACAAATCCGAATCGGCAGTCGCCATCGGTACCGGCTTC  
CGCTTTACCGAAAACCTTTGCCGCAAAGCAGGCGTGGCAGTCGGCACTTCGTCCGGTCTC  
TCCGCAGCCTACCATGTCCGGCTCAATTACGAGTGGTAA

>NEIS1969\_84

ATGAAACACTTTCCATCCAAAGTACTGACCAGCCATCCTTGCCGCCCTCAGCGGCAGC  
GCAATGGCAGACAACGCCCCACCGCTGACGAAATTTGCCAAAGCCGCCCTAGTTAACTCC  
TACAACAATACCAAGACATCAACGGATTACAGTCGGAGACACCATCTACGACATTGAT  
GGAAACAACAAAATTTACGAAAAAAGCAACCCAAAGAAGATGTCGATAACGACGACTTT  
AAAGGTCTGGGTCTGAAAGAAGTCTGGCTCAACACGACCAAAGCCTTGCCGACCTGACC  
GAAACCGTCAATGAAAACAGCGAAGCATTGGTAAAAACCGCGAAGTTGTCAATGAAATC  
AGTACCGATGTCAAAGCCAAACAAAGCGGCTATCACTACAAAAGCAGACAAAGCCAAACTG  
GATGAAGTGTCCGGCAAGGTAACCGCAAACGAGACTGCTATCGCTACAAAAGCAGACAAA  
GCCAAACTGGATGAAGTGTCCGGCAAGGTAACCGCAAACGAGACTGCTATCGCTACAAAA  
GCAGACAAAGCCAAACTGGATGAAGTGTCCGGCAAGGTAACCGCAAACGAGACTGCTATC  
GCTACAAAAGCAAACAGTGCCGACGTGTACTAAAACCCAGTCTGACGAAAAGATTTGTC  
AGAATTGATACCAGCATCGTGGTCTGACCACTACTGCCGATGGATTGGATACACGCTTG  
AAGACTGCCGAAAAAACCTTACCGAACACGGTACGCGCTGAACGGTTTGGATAGAACA  
CTGTACAGACTGCGTAAAGAAAACCCGCAAGGCCTTGCAGAAACAGCCGCGCTCTCCGGC  
CTGTTCCAACCTTACAACGTGGGTTCGGTTCATGTAACGGCTGCAGTCGGCGGCTACAAA  
TCCGAATCGGCAGTCGCCATCGGTACCGGCTTCCGCTTTACCGAAAACCTTTGCCGCAA  
GCAGGCGTGGCAGTCGGCACTTCGTCCGGTCTTCCGCAGCCTACCATGTCCGGCTCAAT  
TACGAGTGGTAA

>NEIS1969\_85

ATGAAACACTTTCCATCCAAAGTACTGACCACAGCCATCCTTGCCACTTTCTGTAGCGGC  
GCACTGGCAGCCACAAACGACGACGATGTTAAAAAAGCTGCCACTGTGGCCATTGCTGCT  
GCCTACAACAATGGCCAAGAAATCAACGGTTTCAAAGCTGGAGAGACCATCTACGACATT  
GATGAAGACGGCACAATTACCAAAAAAGACGCAACTGCAGCCGATGTTGAAGCCGACGAC  
TTTAAAGGTCTGGGTCTGAAAAAAGTCGTGACTAACCTGACCAAAACCGTCAA TAAAAAC  
AAACAAAACGTCGATGCCAAAGTAAAAGCTGCAGAATCTGAAATGAAAAAGTTAACAACC  
AAGTTAGCAGACACTGATGCCGCTTTAGCAGATACTGATGCGCCTCTGGATGCAACCACC  
AACGCCTTGAATAAATTTGGGAGAAAATATAACGACATTTGCTGAAGAGACTAGGGCGTGT  
CCTCAATTTAAGTACTGATGATAAATAGAGCAAGCAAGTAAAGCATCGATTTAAAATTA  
CGAGCTAATTTCTCATAGCAGTAGCAATACTACGAAACTGCTTTAATCGTGCAAAATGCA  
TTCTCGACTAAGTGGCGTAATTTATAAAGGTAGCTATCAAAATCAGGGTTAGGTTTCTTG  
GCATTTTTACGCTTTGGTATAATAGCTTTTATACCGTGTCTATCGCTTTATCTCTGATT  
TCTTGCAGTGCATACCCTTTGTCAGCGATAAAAATACTGGGCTTCTTGTATGACTTCTATC  
AAGTCGTTTGAACCTTGACCGTCTGTCACGTTACCCCAAGTACTTTAAAATCGAGCGGA  
TTTCCATGCGAGTCCACACATAGGTGTATTTTGTGCTGTTCGCCACCGCTTTGTCCA  
ATTGCTCTATCGAAACACGCGGAGCTCCACTTGCATGTTGATGACACCGTACATAACTT  
CCGTCGATGAATACCCATCTTTGTCAATTTCTTTTCGTAGATCAAAAAAAAATTTCTGCC  
ACAAGCCTTTTTTAGACCATCGGTAAAAGCGGTTATAAGCGGTTTTTCCATGACCCTAGCT  
CAATAGGTATGTCTCGCCATGGTGCACCTGTTCTTAGCTTCCATAGTATGGCTTCCATCA  
CGGTACGGTCTGTTCTTCCATTGATGACAGCGGTGCGCTTTCATGGTTGTTTGTAAATGTT  
CCCATATGTTGTCAGTTATTGCGGTTCTCGCCATGTTTGTGTTTGCCTATATTTCCGTTG  
GAATATAGGGTTAAAATAGGGCTCTTTTGGGCTTATTCAAATTAGGGACACGCCCTAAGA  
CAAATATCGTAAAAATGATGAAAAATTAGAAGCCGTGGCTGATACCCGTCGACAAGCATG  
CCGAAGCATTTCAACGATATCGCCGATTTCATTGGATGAAACCAACACTAAGGCAGACGAAG  
CCGTCAAACCCGCAATGAAGCCAAACAGACGGCCGAAGAAACCAAACAAAACGTCGATG  
CCAAAGTAAAAGCTGCAGAACTGCAGCAGGCAAAGCCGAAGCTGCCGCTGGCACAGCTA

ATACTGCAGCCGACAAGGCCGAAGCTGTGCTGCAAAAAGTTACCGACATCAAAGCTGATA  
TCGCTACGAACAAAGATAATATTGCTAAAAAAGCAAACAGTGCCGACGTGTACACCAGAG  
AAGAGTCTGACAGCAAATTTGTCAGAATTGATGGTCTGAACGCTACTACCGAAAAATTGG  
ACACACGCTTGGCTTCTGCTGAAAAATCCATTGCCGATCAGGATACTCGCCTGAACGGTT  
TGGATAAAAACAGTGTGACAGTCTGCGCAAAAGAAACCCGCCAAGGCCTTGCAGAACAAGCCG  
CGCTCTCCGGTCTGTTCCAACCTTACAACGTGGGTGCGTTCAATGTAACGGCTGCAGTCG  
GCGGCTACAAATCCGAATCGGCAGTCCGATCGGTACCGGCTTCCGCTTTACCGAAAACCT  
TTGCCGCCAAAGCAGGCGTGGCAGTCCGCCTTTCGTCCGGTTCTTCTGCAGCCTACCATG  
TCGGCGTCAATTACGAGTGGTAA

>NEIS1969\_87

ATGAAACACTTTCAATCCAAAGTACTGACCGCAGCCATCTTTATCTCCTTCTGTAGCGGC  
GCGCTGGCGGGGGGGGGGGGGGACAAGACTTAACCCCAAAGTTGCCAAAGCCGCCCT  
GGTTGGAACCTACAACAATGCCCAAGAAATCAACGGTTTCAAAGTCGGAGACACCATCTA  
CGACATTGATGGAGACGGCAAAATTACCAAAAAGAAGCAACCCAAGAAGATGTCGATAA  
CGACGACTTTAAAGGTCTGGGTCTGAAAGAAGTTCGCGGCTTACACGACCAAAGCCTTGC  
CGACCTGACCGGAATCGTCGATGAAAACAGCGAAGCATTGGTGAAACCGTCAAGGTTGT  
CAATGAAATCAGTACCGATGTCAAAGCCAACACAGCAGCTATCGCTGAAAAAGCAGACAA  
AACCGAACTGGATAAAGTGTCCAAAAAGGCAGACAAAAACGCTGATGGTATCGCTACAAA  
AGCAAACAGTCCGACGTGTACACTAAAGCTGAGGTGTACACCAAACAAGAGTCTGACAA  
CAGATTTGTCAAATTTGGTGACGGAATCGTAATCTGAACACTACTGCCAATGGATTGGA  
GACACGCTTGGCCGCTGCCGAAAAATCCATTACCGAACACGGTACCGCCTGAACGGTTT  
GGATAGAACAGTGTGACACCTGCGCAAAGAAACCCGCCAAGGCCTTGCAGAAACAAGCCGC  
GCTCTCCGGCCTGTTCCAACCTTACAACGTGAGTTCGGTTCAATGTAACGGCTGCAGTCGG  
CGGCTACAAATCCGAATCGGCAGTCCGATCGGTACCGGCTTCCGCTTTACCGAAAACCT  
TGCCGCCAAAGCAGGCGTGGCAGTCCGCCTTTCGTCCGGTTCTTCCGCAGCCTACCATGT  
CGGCGTCAATTACGAGTGGTAA

>NEIS1969\_88

ATGAAACACTTTCAATCCAAAGTACTGACCGCAGCCATCTTTATCTCCTTCTGTAGCGGC  
GCGCTGGCGGGGGGGGGGGGGGACAAGACTTAACCCCAAAGTTGCCAAAGCCGCCCTGG  
TTGGAACCTACAACAATGCCCAAGAAATCAACGGTTTCAAAGTCGGAGACACCATCTACG  
ACATTGATGGAGACGGCAAAATTACCAAAAAGAAGCAACCCAAGAAGATGTCGATAACG  
ACGACTTTAAAGGTCTGGGTCTGAAAGAAGTTCGCGGCTTACACGACCAAAGCCTTGGCCG  
ACCTGACCGGAATCGTCGATGAAAACAGCGAAGCATTGGTGAAACCGTCAAGGTTGTCA  
ATGAAATCAGTACCGATGTCAAAGCCAACACAGCAGCTATCGCTGAAAAAGCAGACAAAA  
CCGAACCTGGATAAAGTGTCCAAAAAGGCAGACAAAAACGCTGATGGTATCGCTACAAAAG  
CAACAGTCCGACGTGTACACTAAAGCTGAGGTGTACACCAAACAAGAGTCTGACAACA  
GATTTGTCAAATTTGGTGACGGAATCGGTAATCTGAACACTACTGCCAATGGATTGGAGA  
CACGCTTGGCCGCTGCCGAAAAATCCATTACCGAACACGGTACCGCCTGAACGGTTTGG  
ATAGAACAGTGTGACACCTGCGCAAAGAAACCCGCCAAGGCCTTGCAGAAACAAGCCGCGC  
TCTCCGGCCTGTTCCAACCTTACAACGTGAGTTCGGTTCAATGTAACGGCTGCAGTCGGCG  
GCTACAAATCCGAATCGGCAGTCCGATCGGTACCGGCTTCCGCTTTACCGAAAACCTTTG  
CCGCCAAAGCAGGCGTGGCAGTCCGCCTTTCGTCCGGTTCTTCCGCAGCCTACCATGTCCG  
GCGTCAATTACGAGTGGTAA

>NEIS1969\_90

ATGAAACACTTTCCATCCAAAGTACTGACCACAGCCATCCTTGCCACTTTCTGTAGCGGC  
GCACTGGCAGCCACAAGCGACGACGATGTTAAAAAAGCTGCCACTGTGGCCATTGTTGCT  
GCCTACAACAATGGCCAAAGAAATCAACGGTTTCAAAGCTGGAGAGACCATCTACGACATT  
GGTGAAGACGGCACAATTACCCAAAAAGACGCAACTGCAGCCGATGTTGAAGCCGACGAC  
TTTAAAGGTCTGGGTCTGAAAAAAGTCTGACTAACCTGACCAAACCGTCAATGAAAAC  
AAACAAAACGTCGATGCCAAAGTAAAGCTGCAGAATCTGAAATAGAAAAGTTAAACAACC  
AAGTTAGCAGACACTGATGCCGCTTTAGCAGATACTGATGCCGCTCTGGATGAAACCACC  
AACGCCTTGAATAAATTTGGGAGAAAAATATAACGACATTTGCTGAAGAGACTAAGACAAAT  
ATCGTAAAAAATGATGAAAAATTAGAAGCCGTGGCTGATACCGCTGCACAAGCATGCCGAA  
GCATTCAACGATATCGCCGATTCATTGGATGAAACCAACACTAAGGCAGACGAAAGCCGTC  
AAAACCGCCAATGAAGCCAAACAGACGGCCGAAGAAACCAAACAAAACGTTGGATGCCAAA  
GTAAAAGCTGCAGAAACTGCAGCAGGCAAAGCCGAAGCTGCCGCTGGCAGCTAATACT  
GCAGCCGACAAGGCCGAAGCTGTGCTGCAAAAAGTTACCGACATCAAAGCTGATATCGCT  
ACGAACAAGCTGATATTGCTAAAAACTCAGCAGCATCGACAGCTGGACAAAAACGTA  
GCTAATCTGCCCAAAGAAACCCGCCAAGGCCTTGCAGAACAAGCCGCTCTCCGGCCTG  
TTCCAACCTTACAACGTGGGTGCGTTCAATGTAACGGCTGCAGTCCGGCGCTACAAATCC  
GAATCGGCAGTCCGATCGGTACCGGCTTCCGCTTTACCGAAAACCTTTGCCGCCAAAGCA  
GGCGTGGCAGTCCGCCTTTCGTCCGGTTCTTCCGCAGCCTACCATGTCCGGCGTCAATTAC  
GAGTGGTAA

>NEIS1969\_92

ATGAAACACTTTCCATCCAAAGTACTGACCACAGCCATCCTTGCCACTTTCTGTAGCGGC  
GCACTGGCAGCCACAAGCGACGACGATGTTAAAAAAGCTGCCACTGTGGCCATTGTTGCT

GCCTACAACAATGGCCAAGAAATCAACGGTTTCAAAGCTGGAGAGACCATCTACGACATT  
GGTGAAGACGGCACAATTACCCAAAAAGACGCAACTGCAGCCGATGTTGAAGCCGACGAC  
TTTAAAGGTCGGGTCTGAAAAAGTCTGACTAACCTGACCAAAACCGTCAATGAAAAC  
AAACAAAACGTTCGATGCCAAAGTAAAAGCTGCAGAATCTGAAATAGAAAAGTTAACAAAC  
AAGTTAGCAGACACTGATGCCGCTTTAGCAGATACTGATGCCGCTCTGGATGAAACCACC  
AACGCCTTGAATAAATTTGGGAGAAAATATAACGACATTTGCTGAAGAGACTAAGACAAAT  
ATCGTAAAAATTGATGAAAAATTAGAAGCCGTGGCTGATACCGTCGACAAGCATGCCGAA  
GCATTCAACGATATCGCCGATTCATTGGATGAAACCAACACTAAGGCAGACGAAGCCGTC  
AAAACCGCCAATGAAGCCAACAGACGGCCGAAAGAAACCAAAACAAACGTCGATGCCAAA  
GTAAAAGCTGCAGAACTGCAGCAGGCAAAGCCGAAGCTGCCGCTGGCACAGCTAATACT  
GCAGCCGACAAGGCCGAAGCTGTCGCTGCAAAAAGTTACCGACATCAAAGCTGATATCGCT  
ACGAACAAAGCTGATATTGCTAAAACTCAGCACGCATCGACAGCTTGGACAAAACGTA  
GCTAATCTGCGCAAAGAAACCCGCCAAGGCCTTGCAGAACAGCCGCGCTCTCCGGCCTG  
TTCCAACCTTACAACGTGGGTTCGCTTCAATGTAACGGCTGCAGTCGGCGGCTACAAATCC  
GAATCGGCAGTCGCCATCGGTACCGGCTTCCGCTTTACCGAAAACCTTTGCCGCCAAAGCA  
GGCGTGGCAGTCGGCACTTCTGTCGGTTCTTCCGCAGCCACCATGTTCGGCTCAATTAC  
GAGTGGTAA

>NEIS1969\_94

ATGAAACACTTTCAATTCAAAGTACTGACCCGAGCCATCCTTGCCCTCTTCTGTAGCGGC  
GCGCTGGCGGCAATAAACAGTGTAGACCCGAGGTCATCGACCACACCGGCTCGAGAAGTT  
GCCACAGCCGCCCTGGTTGGAGTCTACAACAATAACCCAAGAAATCAACGGTTTCAAAGT  
GGAGACACCATCTACGACATTGATGGAGACGGCAAAATTACCCAAAAAAGCAACCCAAG  
AAGATGTCGATAACGACGACTTTAAAGGTCTGGGTCTGAAAGAAGTCGGGCTCTACACG  
ACCAAAGCCTTGCCGACCTGACCGGAATCGTCGAGGAAAACAGCGAAGCATTGGTAAAAA  
CCGCCAAGGTTGTCATGACATCAGTGCCAATGTCATTGACAACACAGCAGCTATCGGGG  
AAAACAAAAGCTGCTATCGCTACAAAAGCAGACAAAACCGAACTGGATGAAGTGTCCGGCA  
AGGTAACCGCAAACGAGACTGCTATCGGTAATAAAGCAAACAGTCCGACGCTGTACACTA  
AAGCTGAGGTGTACACCAAACAAGAGTCTGACAACAGATTTGTCAAAATTGGTGACAGAA  
TCGGTAATCTGAACACTACTGCCAATGGATTGGAGACACGCTTGGCCGATGCCGAAAAAT  
CCGTTAAAGACCACGGTACGCGCTTGGCTTCTGCCGAAAAATCCATTACCGAACACGGTA  
CGCGCCTGAACGGTTTGGATAGAACAGTGTACAGACCTGCGCAAAGAAACCCGCCAAGGCC  
TTGCAGAACAAGCCGCGCTCTCCGGCCTGTTCCAACCTTACAACGTGGGTTCGGTTCAATG  
TAACGGCTGCAGTCGGCGGCTACAAATCCGAATCGGCAGTCGCCATCGGTACCGGCTTCC  
GCTTTACCGAAAACCTTTGCCGCCAAGCAGGCGTGGCAGTCGGCACTTCTGTCGGTTCTT  
CCGCAGCCTACCATGTTCGGCTCAATTACGAGTGGTAA

>NEIS1969\_96

ATGAAACACTTTTCCATCCAAAGTACTGACCACAGCCATCCTTGCCACTTTCTGTAGCGGC  
GCACTGGCAGCCACAAACGACGACGATGTTAAAAAGCTGCCACTGTGGCCATTGCTGCT  
GCCTACAACAATGGCCAAGAAATCAACGGTTTCAAAGCTGGAGAGACCATCTACGACATT  
GATGAAGACGGCACAATTACCAAAAAGACGCAACTGCAGCCGATGTTGAAGCCGACGAC  
TTTAAAGGTCGGGTCTGAAAAAGTCTGACTAACCTGACCAAAACCGTCAATGAAAAC  
AAACAAAACGTTCGATGCCAAAGTAAAAGCTGCAGAATCTGAAATAGAAAAGTTAACAAAC  
AAGTTAGCAGACACTGATGCCGCTCTGGATGCAACCACCACGCTTGAATAAATTGGGA  
GAAAAATAACGACATTTGCTGAAGAGACTAGGGCGTGTCCCTAATTTGAATAAGCCCAA  
AAGAGCCCTATTTTAAACCCTATATTCCAACGAAATATAGGCAAACACAAACAATGGCGAG  
AACCGCAATAACTGACAACATATGGGAACAATTACAACACCATGAAAGCGCACAGGCTG  
TCATCAATGGAAGAACGACCGTACCGTGTGGAAGCCATACTATGGAAGCTAAGAACAGG  
TGCACCATGGCGAGACATACTATTGAGCTAGGGTTCATGGAACCCGCTTATAACCGCTT  
TAACCGATGGTCTAAAAAAGGCTTGTGGCAGAATTTTTTTTTTGATCTACGAAAAGAAAT  
GACAAAGAATGGGTATTCATCGACGGAAGTTATGTACGGTGTATCAACATGCAAGTGGGA  
GCTCGGCGTGGTTTCGATAGAGCAATTGGACAAGCCGTGGCGGAAACACGACAAAAATA  
CACCTATGTGTGGACTCGCATGGAATCCGCTCGATTTTAAAGTCACTGGGGGTAACGTG  
CACGACGGTCAAGTTGCAACGACTTGATAGAAGTCATACAAGAAGCCAGTATTTTATC  
GCTGACAAAAGGATGACTCGCAAGAAATCAGAGATAAAGCGATAGAACACGGTATGAAA  
GCTATTATACCAAAGCGTAAAAATGCCAAGAAACCTAACCTGATTTTGATAGCTACCTT  
TATAAATTACGCCACTTAGTCGAGAATGCATTTGCACGATTAAGCAGTTTCGTAGTATT  
GCTACTCGCTATGAGAAATTAGCTCGTAATTTTAAATCGATGCTTTACTTGGCTTGCTCT  
ATTATTATGCTAAGTTAAATTGAGGACACGCCCTAAGACAAAATATCGTAAAAATTGATG  
AAAAATTAGAAGCCGTGGCTGATACCTGACAAGCATGCCGAAGCATTCAACGATATCG  
CCGATTCATTGGATGAAACCACACTAAGGCAGACGAAGCCGTCAAACCCGCCAATGAAG  
CCAAACAGACGGCCGAAGAAACCAAAACAAACGTCGATGCCAAAGTAAAAGCTGCAGAAA  
CTGCCGCTGGCACAGCTAATACTGCAGCCGACAAGGCCGAAGCTGTGCTGCAAAAAGTTA  
CCGACATCAAAGCTGATATCGCTACGAACAAGATAATATGCTAAAAAGCAAACAGTG  
CCGACTGTACACCAGAGAGAGTCTGACAGCAAATTTGTCAGAATTTGATGGTCTGAACG  
CTACTCCGAAAAATTTGGACACGCTTGGCTTCTGCCGAAAAATCCATTACCGAACAG  
GTACGCGCCTGAACGGTTTGGATAGAACAGTGTACAGACCTCGCTAAAGAAACCCGCCAAG  
GCCTTGCAGAACAAGCCGCGCTCTCCGGCTGTTTCCAACCTTACAACGTGGGTTCGGTTCA  
ATGTAACGGCTGCAGTCGGCGGCTACAAATCCGAATCGGCAGTCGCCATCGGTACCGGCT

TCCGCTTTACCGAAAACCTTTGCCGCCAAAGCAGGCGTGGCAGTCCGGCACTTCGTCCGGTT  
CTTCCGCAGCCTACCATGTCCGCGTCAATTACGAGTGGTAA

>NEIS1969\_97

ATGAAACACTTTCAATCCAAAGTACTGACCGCAGCCATCCTTGCCGCCCTCAGCGGCAGC  
GCAATGGCAGACAACCCCCCCCCCTTCCACTGACGAAATTGCCAAAGCCGCCCTGGTTGG  
AGTCTACAACAATACCCAAGACATCAACGGATTCAAAGTCGGAGACACCATCTACGACAT  
TGAAAATGGCCAGCCTAAAGGAAGACCAGCAACAGAAGACGATGTTAAAGCCGATGACTT  
CGGCGGTCTGGGTCTGAAAGAAGTCTTGGCTCAACACGACCAAAGCCTTGCCGACCTGAC  
CGGAACCGTCGAGGAAAACAGCGAAGCATTGGTGAAAACCGCCGAAGTTGTCAATGACAT  
CAGTGCCGATGTCAAAGCCAACACAGCAGCTATCAGGGAAAACAAAGCTGCTATCGCTAC  
AAAAGCAGACAAAACCGAAGTGGATGAAGTGTCCGGCAAGGTAACCGCAAACGAGACTGC  
TATCGGTAATAAAGCAAACAGTGCAGCAGTGTACACTAAAGCTGAGGTGTACACCAAACA  
AGAGTCTGACAACAGATTTGTCAAAATTTGGTGACAGAATCGGTAATCTGAACACTACTGC  
CAATGGATTGGAGACACGCTTGGCCGATGCCGAAAAATCCGTTAAAGACCACGGTACGCG  
CTTGGCTTCTGCCGAAAAATCCATTACCGAACACGGTACGCGCCTGAACGGTTTGGATAG  
AACAGTGTGACAGCTGCGCAAAGAAAACCGCCAAGGCCTTGACAGAACAAGCCGCGCTCTC  
CGGCTGTTCACCTTACAACGTGGGTGCGTTCAATGTAACGGCTGCAGTCCGGCGGCTA  
CAAATCCGAATCGGCAGTCCGCATCGGTACCGGCTTCCGCTTACCGAAAACCTTTGCCGC  
CAAAGCAGGCGTGGCAGTCCGCACTTCGTCCGGTTCTTCCGCAGCCTACCATGTCCGCGT  
CAATTACGAGTGGTAA

>NEIS1969\_99

ATGAAACACTTTCAATCCAAAGTACTGACCGCAGCCATCCTTGCCGCCCTCAGCGGCAGC  
GCAATGGCAGACAACCCCCCCCCCTTCCACTGACGAAATTGCCAAAGCCGCCCTGGTTGG  
AGTCTACAACAATACCCAAGACATCAACGGATTCAAAGTCGGAGACACCATCTACGACAT  
TGAAAATGGCCAGCCTAAAGGAAGACCAGCAACAGAAGACGATGTTAAAGCCGATGACTT  
CGGCGGTCTGGGTCTGAAAGAAGTCTTGGCTCAACACGACCAAAGCCTTGCCGACCTGAC  
CGGAACCGTCGAGGAAAACAGCGAAGCATTGGTGAAAACCGCCGAGGTTGTCAATGACAT  
CAGTGCCGATGTCAAAGCCAACACAGCAGCTATCAGGGAAAACAAAGCTGCTATCGCTAC  
AAAGCAGACAAAACCGAAGTGGATGAAGTGTCCGGCAAGGTAACCGCAAACGAGACTGCT  
ATCGGTAATAAAGCAAACAGTGCAGCAGTGTACACTAAAGCTGAGGTGTACACCAAACA  
GAGTCTGACAACAGATTTGTCAAAATTTGGTGACAGAATCGGTAATCTGAACACTACTGCC  
AATGGATTGGAGACACGCTTGGCCGATGCCGAAAAATCCGTTAAAGACCACGGTACGCGC  
TTGGCTTCTGCCGAAAAATCCATTACCGAACACGGTACGCGCCTGAACGGTTTGGATAGA  
ACAGTGTGACAGCTGCGCAAAGAAAACCGCCAAGGCCTTGACAGAACAAGCCGCGCTCTCC  
GGCCTGTTCACCTTACAACGTGGGTGCGTTCAATGTAACGGCTGCAGTCCGGCGGCTAC  
AAATCCGAATCGGCAGTCCGCATCGGTACCGGCTTCCGCTTACCGAAAACCTTTGCCGCC  
AAAGCAGGCGTGGCAGTCCGCACTTCGTCCGGTTCTTCCGCAGCCTACCATGTCCGCGCT  
AATTACGAGTGGTAA

>NEIS1969\_100

ATGAAACACTTTCCATCCAAAGTACTGACCACAGCCATCCTTGCCACTTCTGTAGCGGC  
GCACTGGCAGCCACAACGACGACGATGTTAAAAAAGCTGCCACTGTGGCCATTGCTGCT  
GCCTACAACAATGGCCAAGAATCAACGGTTTCAAAGCTGGAGAGACCATCTACGACATT  
GATGAAGACGGCACAATTACCAAAAAAGACGCAACTGCAGCCGATGTTGAAGCCGACGAC  
TTTAAAGGTCGGGTCTGAAAAAAGTGTGACTAACCTGACAAAACCGTCAATGAAAAC  
AAACAAAACGTCGATGCCAAGTAAAAGCTGCAGAATCTGAAATAGAAAAGTTAAACAACC  
AAGTTAGCAGACATGATGCCGCTTTAGCAGATACTGATGCCGCTCTGGATGCAACCACC  
AACGCCTTGAATAAATTTGGGAGAAAATATAACGACATTTGCTGAAGAGACTAGGGCGTGT  
CCCTAATTTGAATAAGCCCAAAGAGCCCTATTTTAACCTATATTCCAACGAAATATAG  
GCAAACACAACAATGGCGAGAACCGCAATAACTGACAACATATGGGAACAATTACAAC  
AACCATGAAAGCGCACGGCTGTCATCAATGGAAGAACGACCGTACCGTATGGAAGCCAT  
ACTATGGAAGCTAAGAACAGGTGCACCATGGCGAGACATACCTATTGAGCTAGGGTCATG  
GAAAACCGCTTATAACCGCTTTAACCAGTGGTCTAAAAAAGGCTTGTGGCAGAATTTTTT  
TTTTGATCTACGAAAAGAAAATGACAAAAGAATGGGTATTTCATCGACGGAAGTTATGTACG  
GTGTCATCAACATGCAAGTGGAGCTCGGCGTGGTTTCGATAGAGCAATTGGACAAAAGCCG  
TGGCGGAAACACGACAAAAATACACCTATGTGTGGACTCGCATGGAAATCCGCTCGATTT  
TAAAGTCACTGGGGTAACTGCACGACGGTCAAGTTGCAACGACTTGATAGAAGTCAT  
ACAAGAAGCCAGTATTTTATCGCTGACAAAAGGTTATGACTCGCAAGAAATCAGAGATAA  
AGCGATAGAACACGGTATGAAAGCTATTATACCAAGCGTAAAAATGCCAAGAAACCTAA  
CCCTGATTTTGTAGTAGTACCTTTATAAATACGCCACTTAGTTCGAGAATGCATTTGCACG  
ATTAAAGCAGTTTCGTAGTATTGCTACTCGCTATGAGAAAATTAGCTCGTAATTTTAAATC  
GATGCTTTACTTGGCTTGGCTCTATTATTTCATGCTAAGTTAAATTGAGGACACGCCCTAAG  
ACAAATATCGTAAAAATTTGTAAGAAAATTTAGAAGCCGTGGCTGATACCGTGCACAAGCAT  
GCCGAAGCATTCAACGATATCGCCGATTCATTGGATGAAACCAACACTAAGGCAGACGAA  
GCCGTCAAACCGCCAAATGAAGCAACAGACGGCCGAAGAAAACCAAACAAACAGTCCGAT  
GCCAAAGTAAAAGCTGCAGAACTGCAGCAGGCAAAGCCGAAGCTGCCGCTGGCACAGCT  
AATACTGCAGCCGACAAGGCCGAAGCTGTCGCTGCAAAAAGTTACCGACATCAAAGCTGAT  
ATCGCTACGAAACAAGATAAATTTGCTAAAAAAGCAAACAGTGCAGCAGTGTACACCAGA

GAAGAGTCTGACAGCAAATTTGTCAGAATTGATGGTCTGAACGCTACTACCGAAAAATTG  
GACACACGCTTGGCTTCTGCTGAAAAATCCATTGCCGATCACGATACTCGCTGAACGGT  
TTGGATAAAAACAGTGTGACACCTGCGCAAAGAAACCCGCCAAGGCCTTGACAGAAACAGCC  
GCGCTCTCCGGTCTGTTCCAACCTTACAACGTGGGTCCGTTCAATGTAACGGCTGCAGTC  
GGCGGCTACAAATCCGAATCCGCGAGTCGCCATCGGTACCGGCTTCCGCTTACCGAAAAAC  
TTTGGCGCAAAGCAGGCGTGGCAGTCGGCACTTCGTCCGGTTCTTCTGCAGCTACCAT  
GTCGGCGTCAATTACGAGTGGTAA

>NEIS1969\_103

ATGAAACACTTTCATCCAAAGTACTGACCACAGCCATCCTTGCCACTTTCTGTAGCGG  
GCACTGGCAGCCACAAGCGACGACGATGTTAAAAAAGCTGCCACTGTGGCCATTGTTGCT  
GCCTACAACAATGGCCAAGAAATCAACGGTTTCAAAGCTGGAGAGACCATCTACGACATT  
GGTGAAGACGGCACAATTACCCAAAAAGACGCAACTGCAGCCGATGTTGAAGCCGACGAC  
TTTAAAGGTCTGGGTCTGAAAAAAGTCGTGACTAACCTGACCAAAACCGTCAATGAAAAC  
AAACAAAACGTCGATGCCAAAGTAAAAGCTGCAGAATCTGAAATAGAAAAGTTAACAACC  
AAGTTAGCAGACACTGATGCGCGCTTTAGCAGATACTGATGCGCTCTGGATGAAACCACC  
AACGCCTTGAATAAATTTGGGAGAAAATATAACGACATTTGCTGAAGAGACTAAGACAAAT  
ATCGTAAAAATTGATGAAAAATTAGAAGCCGTGGCTGATACCGTCGACAAGCATGCCGAA  
GCATTCACGATATCGCCGATTCATTGGATGAAACCAACACTAAGGCAGACGAAGCCGTC  
AAAACCGCCAATGAAGCCAACAGACGGCCGAAGAAACCAAAACAAACGTCGATGCCAAA  
GTAAAAGCTGCAGAAACTGCAGCAGGCAAGCCGAAGCTGCCGCTGGCACAGCTAATACT  
GCAGCCGACAAGCCGAAGCTGTCGCTGCAAAAAGTTACCGACATCAAAGCTGATATCGCT  
ACGAACAAAGCTGATATTGCTAAAAACTCAGCACGCATCGACAGCTTGGACAAAAACGTA  
GCTAATCTGCGCAAAGAAACCCGCCAAGCCCTTGCAGAACAAGCCGCGCTCTCCGGCCTG  
TTCCAACCTTACAACGTGGGTTCGTTCAATGTAACGGCTGCAGTCGGCGGCTACAAATCC  
GAATCGGCAGTCGCCATCGGTACCGGCTTCCGCTTTACCGAAAACTTTGCCGCCAAAGCA  
GGCGTGGCAGTCGGCACTTCGTCCGGTTCTTCCGCAGCTACCATGTCCGGCTCAATTAC  
GAGTAA

>NEIS1969\_104

GTATGAAACACTTTCATCCAAAGTACTGACCACAGCCATCCTTGCCACTTTCTGTAGCG  
GCGCACTGGCAGCCACAACGACGACGATGTTAAAAAAGCTGCCACTGTGGCCATTGCTG  
CTGCCTACAACAATGGCCAAGAAATCAACGGTTTCAAAGCTGGAGAGACCATCTACGACA  
TTGATGAAGACGGCACAATTACCAAAAAAGACGCAACTGCAGCCGATGTTGAAGCCGACG  
ACTTTAAAGGTCTGGGTCTGAAAAAAGTCGTGACTAACCTGACCAAAACCGTCAATGAAA  
ACAAACAAAACGTCGATGCCAAAGTAAAAGCTGCAGAATCTGAAATAGAAAAGTTAACA  
CCAAGTTAGCAGACACTGATGCCGCTCTGGATGCAACCACCAACGCCTTGAATAAATTTGG  
GAGAAAATATAACGACATTTGCTGAAGAGACTAAGACAAATATCGTAAAAATGATGAAA  
AATTAGAAGCGTGGCTGATACCGCTCGACAAGCATGCCGAAGCATTCAACGATATCGCCG  
ATTCATTGGATGAAACCAACACTAAGGCAGACGAAGCCGTCAAACCGCCAATGAAGCCA  
AACAGACGGCCGAAGAAACCAAAACAAAACGTCGATGCCAAAGTAAAAGCTGCAGAACTG  
CAGCAGGCAAGCCGAAGCTGCCGCTGGCACAGCTAATACTGCAGCCGACAAGGCCGAAG  
CTGTGCTGCAAAAAGTTACCGACATCAAAGCTGATATCGCTACGAACAAAGCTGATATTG  
CTAAAACACTCAGCAGCTCGACAGCTTGGACAAAAACGTAAGTAACTGCGCAAAGAAA  
CCCGCCAAGGCTTGCAGAACAAAGCCGCGCTCTCCGGCCTGTTCCAACCTTACAACGTTG  
GTCGGTTCAATGTAACGGCTGCAGTCGGCGGCTACAAATCCGAATCGGCAGTCGCCATCG  
GTACCGGCTTCCGCTTTACCGAAAACTTTGCCGCCAAAGCAGGCGTGGCAGTCGGCACTT  
CGTCCGGTTCTTCCGCAGCTACCATGTCCGGCTCAATTACGAGTGGTAA

>NEIS1969\_105

ATGAAACACTTTCATCCAAAGTACTGACCACAGCCATCCTTGCCGCCCTCAGCGGCAGC  
GCAATGGCAGACAACCCCCCTTCCACTGACGAAATTGCCAAAGCCGCCCTGGTTGGAG  
TCTACAACAATACCAAGACATCAACGGATTCAAAGTCGGAGACACCATCTACGACATTG  
AAAATGGCCAGCCTAAAGGAAGACCAGCAACAGAAGACGATGTTAAAGCCGATGACTTCG  
GCGGTCTGGGTCTGAAAGAAGTCTTGGCTCAACACGACCAAAAGCCTTGGCGACCTGACCG  
GAACCGTCGAGGAAAACAGCGAAGCATTGGTGAAAACCCGCGAGGTTGTAATGACATCA  
GTGCCGATGTCAAAGCCAACACAGCAGCTATCAGGAAAACAAAGCTGCTATCGCTACAAA  
AGCAGACAAAACCGAAGTGGATGAAGTGTCCGGCAAGGTAACCGCAAACGAGACTGCTAT  
CGGTAAAAAAGCAAACAGTCCGACGCTGTACACTAAAGCTGAGGTGTACACCAACAAGA  
GTCTGACAACAGATTTGTCAAATTTGGTGACGAATCCGGTAATCTGAACACTACTGCCAA  
TGGATTGGAGACACTTGGCCGATGCCGAAAAATCCGTTAAAGACCAGGTCGCGCTT  
GGCTTCTGCCGAAAAATCCATTACCGAACACGGTACGCGCTGAACGGTTTGGATAGAAC  
AGTGTGACACCTGCGCAAAGAAACCCGCCAAGGCCTTGCAGAACAAAGCCGCGCTCTCCGG  
CCTGTTCCAACCTTACAACGTGGGTTCGTTCAATGTAACGGCTGCAGTCGGCGGCTACAA  
ATCCGAATCGGCAGTCGCCATCGGTACCGGCTTCCGCTTTACCGAAAACTTTGCCGCCAA  
AGCAGGCGTGGCAGTCGGCACTTCGTCCGGTTCTTCCGCAGCTACCATGTCCGGCTCAA  
TTACGAGTGGTAA

>NEIS1969\_106

ATGAAACACTTTCATCCAAAGTACTGACCACAGCCATCCTTGCCGCCCTCAGCGGCAGC

GCAATGGCAGGCAACCCCCCTTTCCACTGACGAAATTGCCACAGCCGCCATGGTTGGA  
TCCTACAACAATGCCCAAGAAATCAACGGTTTCGAAGTCGGAGACACCATCTACGACATT  
AATGGAGACGGCAAAATTACCAAAAAACAGCAACCCAAGAAGATGTCGATAACGACGAC  
TTTAAAGGTCCTGGGTCTGAAAGAAGTCTGGCTCGACACGACCAAGCCTTGCCGACCTG  
ACCGGAACCGTTCGAGGAAAAACAGCGAAGCATTGGTAAAAAACCGCCGAGGTTGTCAATGAC  
ATCAGTGCCGATGTCAAAGCCAACACAGCAGCTATCGGGGAAAACAAAGCTGCTATCGCT  
ACAAAAGCAGACAAAACCGAACTGGATAAAGTGTCCGGCAAAGTAACCGAGAACGAGACT  
GCTATCGGTAAAAAAGCAAACAGTGCAGCAGTGTACACTAAAGCTGAGGTGTACACCAAA  
CAAGAGTCTGACAACAGATTTGTCAAAATTAGTGACGGAATCGGTAATCTGAACACTACT  
GCCAATGGATTGGAGACACGCTTGGCCGCTGCCGAACAATCCGTTGCAGACCACGGTACG  
CGCTTGGCTTCTGCCGAAAAATCCATTACCGAACACGGTACGCGCCTGAACGGTTTTGGAT  
AGAACAGTGTGACAGCTGCGTAAAGAAACCGCCAAAGGCTTGCAGAACAAAGCCGCGCTC  
TCCGGTCTGTCCAACCTTACAACGTGGGTTCGTTCAATGTAACGGCTGCAGTCCGCGGC  
TACAAATCCGAATCGGCAGTCCGCATCGGTACCGGCTTCCGCTTTACCGAAAACTTTGCC  
GCCAAAGCAGGCGTGGCAGTCCGCACCTTCGTCCGGTTCTCCGACGCTACCATGTCCGG  
GTCAATTACGAGTGGTAA

>NEIS1969\_107

ATGAAACACTTTCCATCCAAAGTACTGACCACAGCCATCCTTGCCACTTTCTGTAGCGGC  
GCACTGGCAGCCACAAACGACGACGATGTTAAAAAAGCTGCCACTGTGGCCATTGCTGCT  
GCCTACAACAATGGCCCAAGAAATCAACGGTTTCAAAGCTGGAGAGACCATCTACGACATT  
GATGAAGACGGCACAATACCAAAAAAGACGCAACTGCAGCCGATGTTGAAGCCGACGAC  
TTTAAAGGTCCTGGGTCTGAAAAAGTCTGACTAACCTGACCAAAACCGTCAATGAAAAC  
AAACAAAACGTGATGCCAAAGTAAAAGCTGCAGAATCTGAAATAGAAAAGTTAACAACC  
AAGTTAGCAGACACTGATGCCGCTCTGGATGCAACCACCAACGCTTGAATAAATTGGGA  
GAAAAATAACGACATTTGCTGAAGAGACTAAGACAAATATCGTAAAAATGATGAAAAA  
TTAGAAGCCGTGGCTGATACCGTCGACAAGCATGCCGAAGCATTCAACGATATCGCCGAT  
TCATTGGATGAAACCAACACTAAGGCAGACGAAAGCCGTCAAAACCGCCAATGAAGCCAAA  
CAGACGGCCGAAAGAAACCAAAACAAACGTCGATGCCAAAGTAAAAGCTGCAGAAACTGCA  
GCAGGCAAAGCCGAAGCTGCCGCTGGCACAGCTAATACGACCCGACAAGCCGAAGCT  
GTCGCTGCAAAAGTTACCGACATCAAAGCTGATATCGCTACGAACAAAGATAATATTGCT  
AAAAAAGCAAACAGTCCGACGCTGTACACCAGAGAAGAGTCTGCAGCAAATTTGTGAGA  
ATTGATGGTCTGAACGCTACTACCGAAAAATTTGGACACACGCTTGGCTTCTGCCGAAAAA  
TCCATTACCGAACACGGTACGCGCCTGAACGGTTTGGATAGAACAGTGTGACAGCTGCGT  
AAAGAAACCCGCAAGGCTTGCAGAACAAAGCCGCGCTCTCCGGTCTGTTCACCTTAC  
AACGTGGGTCCGTTCAATGTAACGGCTGCAGTCCGCGGTACAAATCCGAATCGGCAGTC  
GCCATCGGTACCGACTTCCGCTTTACCGAAAACTTTGCCGCAAAAGCAGGCGTGGCAGTC  
GGCACTTCGTCCGGTTCTTCCGACGCTACCATGTCCGGCTCAATTACGAGTGGTAA

>NEIS1969\_108

ATGAAACACTTTCCATCCAAAGTACTGACCGCAGCCATCCTTGCCGCCCTCAGCGGCAGC  
GCAATGGCAGACAACGCCCCACCGCTGACGAAATTGCCAAAGCCGCCCTAGTTAACTCC  
TACAACAATACCCAAGACATCAACGGATTACAGTCCGAGACACCATCTACGACATTGAT  
GGAAACAACAAAATTTATCGAAAAAAGCAACCCAAGAAGATGTCGATAACGACGACTTT  
AAAGGTCTGGGTCTGAAAGAAGTCTGGCTCAACACGACCAAAAGCCTTGCCGACCTGACC  
GAAACCGTCAATGAAAACAGCGAAGCATTGGTAAAAAACCGCCGAAGTTGTCAATGAAATC  
AGTACCGATGTCAAAGCCAACAAAGCGGCTATCACTACAAAAGCAGACAAGCCAAACTG  
GATGAAGTGTCCGGCAAGGTAACCGCAAACGAGACTGCTATCGCTACAAAAGCAGACAAA  
GCCAAACTGGATGAAGTGTCCGGCAAGGTAACCGCAAACGAGACTGCTATCGCTACAAA  
GCAAACAGTGCAGCAGTGTACATAAAACCCAGTCTGACGAAAGATTTGTGAGAATTGAT  
ACCAGCATCGGTGGTCTGACCACTACTGCCGATGGATTGGATACACGCTTGAAGACTGCC  
GAAAAAACCAATTACCGAACACGGTACGCGCCTGAACGGTTTGGATAGAACAGTGTGACG  
CTGCGTAAAGAAACCCGCCAAGGCTTGCAGAACAAAGCCGCGCTCTCCGGCTGTTCCAA  
CCTTACAACGTGGGTCCGTTCAATGTAACGGCTGCAGTCCGCGGTACAAATCCGAATCG  
GCAGTCCCATCGGTACCGGCTTCCGCTTTACCGAAAACTTTGCCGCAAAAGCAGGCGTG  
GCAGTCCGCACCTTCGTCCGGTTCTTCCGACGCTACCATGTCCGGCTCAATTACGAGTGG  
TAA

>NEIS1969\_109

ATGAAACACTTTCCATCCAAAGTACTGACCGCAGCCATCCTTGCCGCCCTCAGCGGCAGC  
GCAATGGCAGACAACGCCCCACCGCTGACGAAATTGCCAAAGCCGCCCTAGTTAACTCC  
TACAACAATACCCAAGACATCAACGGATTACAGTCCGAGACACCATCTACGACATTTAAA  
AATGACAAGATTACCAAAAAAGCAACAGAAGCCGATGTTGAAGCTGACGACTTTAAA  
GGTCTGGGTCTGAAAGAAGTCTGGCTCAACACGACCAAAAGCCTTGCCGACCTGACCGAA  
ACCGTCAATGAAAACAGCGAAGCATTGGTAAAAAACCGCCGCGGTTGTCAATGACATCAGT  
GCCGATGTCAAAGCCAACACAGCAGCTATCGGGGAAAACAAAGCTGCTATCGCTACAAA  
GCAGACAAAACCGAACTGGATAAAGTGTCCGGCAAAGTAACCGAGAACGAGACTGCTATC  
GGTAAAAAAGCAAACAGTGCAGCAGTGTACACTAAAGCTGAGGTGTACACCAAAACAAGAG  
TCTGACAACAGATTTGTCAAAATTAGTGACGGAATCGGTAATCTGAACACTACTGCCAAT  
GGATTGGAGACAGCTTGGCCGCTGCCGAACAATCCGTTGCAGACCACGGTACGCGCTTG

GCTTCTGCCGAAAAATCCATTACCGAACACGGTACGCGCCTGAACGGTTTGGATAGAACA  
GTGT CAGACCTGCGTAAAGAAACCCGCCAAGCGCTTGCAGAACAGCCGCGCTCTCCGGT  
CTGTTCCAACCTTACAACGTGGGTGCGTTCATGTAACGGTGCAGTCGGCGGCTACAAA  
TCCGAATCGGCAGTCGCCATCGGTACCGGCTTCCGCTTTACCGAAAACCTTGGCCGCAAA  
GCAGGCGTGGCAGTCGGCACTTCGTCCGGTCTTCCGCAGCCTACCATGTCCGGCGTCAAT  
TACGAGTGGTAA

>NEIS1969\_110

ATGAAACACTTTCAATCCAAAGTACTGACCGCAGCCATCCTTGCCGCCCTCAGCGGCAGC  
GCAATGGCAGACAACGCCCCACCGCTGACGAAATTGCCAAAGCCGCCCTAGTTAACTCC  
TACAACAATACCCAAGACATCAACGGATTCAAAGCCGGAGACACCATCTACGACATTGGT  
GAAGACGGCACAATTACCCAAAAAGACGCAACTGCAGCCGATGTTGAAGCCGACGACTTT  
AAAGGTCTGGTCTGAAAAAGTCTGTGACTAACCTGACCAAACCGTCAATGAAAAACAAA  
CAAAACGTGCGATGCCAAAGTAAAAGCTGCAGAATCTGAAATAGAAAAGTTAAACAACCAAG  
TTAGCAGACACTGATGCCGCTTTAGCAGATACTGATGCCGCTCTGGATGAAACCACCAAC  
GCCTTGAATAAATTGGGAGAAAAATAAACGACATTTGCTGAAAGAGACTAAGACAAAATATC  
GTA AAAATGATGAAAAATTAGAAGCCGTGGCTGATACCGTCGACAAGCATGCCGAAGCA  
TTCAACGATATCGCCGATTCAATTGGATGAAACCAACACTAAAGGCAGACGAAGCCGTCAA  
AACCCGCCAATGAAGCCAAACAGACGGCCGAAAGAAACCAACAAAACGTGCGATGCCCAAA  
GTAAAAGCTGCAGAAACTGCAGCAGGCAAAGCCGAAGCTGCCGCTGGCACAGCTAATACT  
GCAGCCGACAAGGCCGAAGCTGTGCTGCAAAAAGTTACCGACATCAAAGCTGATATCGCT  
ACGAACAAGATAAATATTGCTAAAAAAGCAAACAGTGCCGACGTGTACACCAGAGAAGAG  
TCTGACAGCAAATTTGTCAGAATTGATGGTCTGAACGCTACTACCGAAAAATGGACACA  
CGCTTGGCTTCTGCTGAAAAATCCATTGCCGATCACGATACTCGCCTGAACGGTTTGGAT  
AAAACAGTGTGAGACCTGCGCAAAGAAACCCGCCAAGGCCTTGCAGAACAAGCCGCGCTC  
TCCGGTCTGTTCCAACCTTACAACGTGGGTGCGTTCATGTAACGGTGCAGTCGGCGGC  
TACAAATCCGAATCGGCAGTCGCCATCGGTCCCGCTTCCGCTTTACCGAAAACCTTTGCC  
GCCAAAGCAGGCGTGGCAGTCGGCACTTCGTCCGGTCTTCCGCAGCCTACCATGTCCGG  
GTCAATTACGAGTGGTAA

>NEIS1969\_111

ATGAAACACTTTCCATCCAAAGTACTGACCACAGCCATCCTTGCCACTTTCTGTAGCGGC  
GCACTGGCAGCCACAAGCGACGACGATGTTAAAAAAGCTGCCACTGTGGCCATTGTTGCT  
GCCTACAACAATGGCCAAGAAATCAACGGTTTCAAAGCTGGAGAGACCATCTACGACATT  
GGTGAAGACGGCACAATTACCCAAAAAGACGCAACTGCAGCCGATGTTGAAGCCGACGAC  
TTTAAAGGTCTGGGTCTGAAAAAAGTCTGTGACTAACCTGACCAAACCGTCAATGAAAA  
AAACAAAACGTGCGATGCCAAAGTAAAAGCTGCAGAATCTGAAATAGAAAAGTTAAACAAC  
AAGTTAGCAGACACTGATGCCGCTTTAGCAGATACTGATGCCGCTCTGGATGAAACCACC  
AACGCCTTGAATAAATTTGGGAGAAAAATAAACGACATTTGCTGAAAGAGACTAAGACAAA  
ATCGTAAAAATGATGAAAAATTAGAAGCCGTGGCTGATACCGTCGACAAGCATGCCGAA  
GCATTCAACGATATCGCCGATTCAATTGGATGAAACCAACACTAAGGCAGACGAAGCCGTC  
AAAACCGCCAATGAAGCCAAACAGACGGCCGAAAGAAACCAACAAAACGTGCGATGCCAAA  
GTAAAAGCTGCAGAAACTGCAGCAGGCAAAGCCGAAGCTGCCGCTGGCACAGCTAATACT  
GCAGCCGACAAGGCCGAAGCTGTGCTGCAAAAAGTTACCGACATCAAAGCTGATATCGCT  
ACGAACAAGCTGATATTGCTAAAAACTCAGCACGATCGACAGCTTGGACAAAAACGTA  
GCTAATCTGCGCAAAGAAACCCGCCAAGGCCCTGCAGAACAAGCCGCGCTCTCCGGCCTG  
TTCCAACCTTACAACGTGGGTGCGTTCATGTAACGGTGCAGTCGGCGGCTACAAATCC  
GAATCGGCAGTCACCATCGGTACCGGCTTCCGCTTTACCGAAAACCTTTGCCGCAAAAGCA  
GGCGTGGCAGTCGGCACTTCGTCCGGTCTTCCGCAGCCTACCATGTCCGGCGTCAATTAC  
GAGTGGTAA

>NEIS1969\_112

ATGAAACACTTTCCATCCAAAGTACTGACCACAGCCATCCTTGCCACTTTTCTGTAGCGG  
CGCACTGGCAGCCACAACGACGACGATGTTAAAAAAGCTGCCACTGTGGCCATTGCTGC  
TGCCTACAACAATGGCCAAGAAATCAACGGTTTCAAAGCTGGAGAGACCATCTACGACAT  
TGATGAAGACGGCACAATTACCAAAAAAGACGCAACTGCAGCCGATGTTGAAGCCGACGA  
CTTTAAAGGTCTGGGTCTGAAAAAAGTCTGTGACTAACCTGACCAAACCGTCAATGAAAA  
CAAACAAAACGTGCGATGCCAAAGTAAAAGCTGCAGAATCTGAAATAGAAAAGTTAAACA  
CAAGTTAGCAGACACTGATGCCGCTCTGGATGCAACCACCAACGCCTTGAATAAATTTGG  
AGAAAATATAACGACATTTGCTGAAGAGACTAAGACAAAATATCGTAAAAATGATGAAAA  
ATTAGAAGCCGTGGCTGATACCGTCGACAAGCATGCCGAAGCATTCACAGATATCGCCGA  
TTCAATTGGATGAAACCAACACTAAGGCAGACGAAGCCGTCAAACCGCCAATGAAGCCAA  
ACAGACGGCCGAAAGAAACCAACAAAACGTGCGATGCCAAAGTAAAAGCTGCAGAACTGC  
CGCTGGCACAGCTAATACTGCAGCCGACAAGCCGAAGCTGTGCTGCAAAAAGTTACCGA  
CATCAAAGCTGATATCGCTACGAACAAGATAATATTGCTAAAAAAGCAAACAGTGCCGA  
CGTGTACACCAGAGAAGAGTCTGCAGCAAATTTGTCAGAATGATGGTCTGAACGCTAC  
TACCGAAAAATTTGGACACACGCTTGGCTTTCGCCGAAAAATCCATTACCGAACACGCTAC  
CGCCTGAACGGTTTGGATAGAACAGTGTGACAGCTGCGTAAAGAAACCCGCCAAGGCC  
TGCAGAACAAGCCGCGCTCTCCGGTCTGTTCCAACCTTACAACGTGGGTGCGTTCATGTA  
AACGGCTGCAGTCGGCGGCTACAAATCCGAATCGGCAGTCGCCATCGGTACCGGCTTCCG

CTTTACCGAAAACCTTTGCCGCCAAAGCAGGCGTGGCAGTCGGCACTTCGTCCGGTTCTTC  
CGCAGCCTACCATGTCCGGCTCAATTACGAGTGGTAA

>NEIS1969\_113

ATGAAACACTTTCAATCCAAAGTCTGACCGCAGCCATCCTTGCCGCCCTCAGCGGCAGC  
GCAATAGCAGCTGACGTTTACGAAAAATCAGAAGTAGACACCAAGATTACCGACGCAAAA  
ACCGCGGTAACCACCGATCTCGAAAGCAAAATCAACGCCGCAAAAAAAGAACTGGGCGAC  
AAGCTGGATAAACAAAAAGACAGCGACAGCAAAAGAGATTGAGAAAGTCAAACCGCTATT  
ACTGGCGTTAAAAACCTCCTTGAGGTGACCCAAAAGACGACCAAAATCCTGGATTGATT  
GGCACCATTGGCCGACCTTAACAAATCCATAAACGGCGATGTGGAAGAAAACGGTAAAAAA  
AATTCTGGATTGATTGACACCGTTGCCGAGCTTGACAAAATCCGTAAAAAGCAACAAATC  
TGAAATAGATGAATAAAAAAGATTTGGAAACCACCGACAACCGCTGGATGAAACTAC  
CAACGCCTTGAATAAATTTGGAGAAAAATATAACGACATTTGCTGAAGAGACTAAGACAAA  
TATCGTAAAAATTTGATGAAAAATTAGAAGCCGTGGCTGATACCGTCGACAAGCATGCCGA  
AGCATTCAACGATATCGCCGATTCATTGGATGAAACCAACACTAAGGCAGACGAAGCCGT  
CAAACCGCCAAATGAAGCCAAACAGACGGCCGAAGAAAACCAACAAAACGTCGATGCCAA  
AGTAAAAGCTGCAGAAACTGCAGCAGGCAAAGCCGAAGCTGCCGCTGGCAGCTAATAC  
TGCAGCCGACAAGGCCGAAGCTGTGCTGCAAAAGTTACCGACATCAAAGCTGATATCGC  
TACGAACAAAGCTGATATTGCTAAAAACTCAGCACGCATCGACAGCTTGACAAAAACGT  
AGCTAATCTGCGCAAAGAAACCCGCCAAGGCCCTTGCAAGAACAGCCGCGCTCTCCGGCCT  
GTTCCAACCTTACAACGTGGTTCGGTTCAATGTAACGGCTGCAGTCGGCGGCTACAAATC  
CGAATCGGCAGTCGCCATCGGTACCGCTTCCGCTTTACCGAAAACCTTTGCCGCCAAAGC  
AGGCGTGGCAGTCGGCACTTCGTCCGGTTCTTCCGCAGCCTACCATGTCCGGCTCAATTA  
CGAGTGGTAA

>NEIS1969\_114

ATGAAACACTTTCCATCCAAAGTACTGACCACAGCCATCCTTGCCACTTTTCTGTAGCGGC  
GCACTGGCAGCCACAAACGACGACGATGTTAAAAAAGCTGCCACTGTGGCCATTGCTGCT  
GCCTACAACAATGGCCAAGAAATCAACGGTTTCAAAGCTGGAGAGACCATCTACGACATT  
GATGAAGACGGCACAATTACCAAAAAAGACGCAACTGCAGCCGATGTTGAAGCCGACGAC  
TTTAAAGGCTCGGGTCTGAAAAAAGTCGTGACTAACCTGACCAAAACCGTCAATGAAAAC  
AAACAAAACGTCGATGCCAAAGTAAAAGCTGCAGAATCTGAAATAGAAAAGTTAAACAACC  
AAGTTAGCAGACACTGATGCCGCTCTGGATGCAACCACCAACGCCTTGAATAAATTGGGA  
GAAAATATAACGACATTTGCTGAAGAGACTAAGACAAAATATCGTAAAAATTTGATGAAAA  
TTAGAAGCCGTGGCTGATACCGTCGACAAGCATGCCGAAGCATTCAACGATATCGCCGAT  
TCATTGGATGAAACCAACACTAAGGCAGACGAAGCCGTCAAACCGCCAAATGAAGCCAA  
ACAGACGGCCGAAGAAAACCAAAACAAACGTCGATGCCAAAGTAAAAGCTGCAGAAACTGC  
AGCAGGCAAAGCCGAAGCTGCCGCTGGCACAGCTAATACTGCAGCCGACAAGGCCAAGC  
TGTCGCTGCAAAAGTTACCGACATCAAAGCTGATATCGCTACGAACAAAAGATAAATATTGC  
TAAAAAAGCAAAACAGTGCCGACGTGTACACCAGAGAAGAGTCTGACAGCAAATTTGTGTCAG  
AATTGATGGTCTGAACGCTACTACCGAAAAATTTGGACACACGCTTTGGCTTCTGCCGAAA  
ATCCATTACCGAACACGGTACGCGCCTGAACGGTTTGGATAGAACAGTGTGACGACCTGCG  
TAAAGAAACCCGCCAAGGCCCTTGCAAGAACAGCCGCGCTCTCCGGTCTGTTCCAACCTTA  
CAACGTGGGTTCGGTTCAATGTAACGGCTGCAGTCGGCGGCTACAAATCCGAATCGGCAGT  
CGCCATCGGTACCGGCTTCCGCTTTACCGAAAACCTTTGCCGCCAAAGCAGGCGTGGCAGT  
CGGCACCTTCGTCCGGTTCTTCCGCAGCCTACCATGTCCGGCTCAATTACGAGTGGTAA

>NEIS1969\_115

ATGAAACACTTTCCATCCAAAGTACTGACCACAGCCATCCTTGCCACTTTTCTGTAGCGGC  
GCACTGGCAGCCACAAACGACGACGATGTTAAAAAAGCTGCCACTGTGGCCATTGCTGCT  
GCCTACAACAATGGCCAAGAAATCAACGGTTTCAAAGCTGGAGAGACCATCTACGACATT  
GATGAAGACGGCACAATTACCAAAAAAGACGCAACTGCAGCCGATGTTGAAGCCGACGAC  
TTTAAAGGCTCGGGTCTGAAAAAAGTCGTGACTAACCTGACCAAAACCGTCAATGAAAAC  
AAACAAAACGTCGATGCCAAAGTAAAAGCTGCAGAATCTGAAATAGAAAAGTTAAACAACC  
AAGTTAGCAGACACTGATGCCGCTCTGGATGCAACCACCAACGCCTTGAATAAATTGGGA  
GAAAATATAACGACATTTGCTGAAGAGACTAAGACAAAATATCGTAAAAATTTGATGAAAA  
TTAGAAGCCGTGGCTGATACCGTCGACAAGCATGCCGAAGCATTCAACGATATCGCCGAT  
TCATTGGATGAAACCAACACTAAGGCAGACGAAGCCGTCAAACCGCCAAATGAAGCCAAA  
CAGACGGCCGAAGAAAACCAAAACAAACGTCGATGCCAAAGTAAAAGCTGCAGAAACTGCC  
GCTGTCAAAGCTGCAGAAACTGCCGCTGGCACAGCTAATACTGCAGCCGACAAGGCCGAA  
GCTGTGCTGCAAAAGTTACCGACATCAAAGCTGATATCGCTACGAACAAAAGATAAATTT  
GCTAAAAAAGCAAAACAGTGCCGACGTGTACACCAGAGAAGAGTCTGACAGCAAATTTGTG  
AGAATTGATGGTCTGAACGCTACTACCGAAAAATTTGGACACACGCTTTGGCTTCTGCCGAA  
AAATCCATTACCGAACACGGTACGCGCCTGAACGGTTTGGATAGAACAGTGTGACGACCTG  
CGTAAAGAAACCCGCCAAGGCCCTTGCAAGAACAGCCGCGCTCTCCGGTCTGTTCCAACCT  
TACAACGTGGGTTCGGTTCAATGTAACGGCTGCAGTCGGCGGCTACAAATCCGAATCGGCA  
GTCGCCATCGGTACCGGCTTCCGCTTTACCGAAAACCTTTGCCGCCAAAGCAGGCGTGGCA  
GTCGGCACTTCGTCCGGTTCTTCCGCAGCCTACCATGTCCGGCTCAATTACGAGTGGTAA

>NEIS1969\_116

ATGAAACACTTTCCATCCAAAGTACTGACCACAGCCATCCTTGCCACTTTCTGTAGCGGC  
GCACTGGCAGCCACAAACGACGACGATGTTAAAAAAGCTGCCACTGTGGCCATTGCTGCT  
GCCTACAACAATGGCCAAGAAATCAACGGTTTCAAAGCTGGAGAGACCATCTACGACATT  
GATGAAGACGGCACAATTACCAAAAAAGACGCAACTGCAGCCGATGTTGAAGCCGACGAC  
TTTAAAGGTCCTGGGTCTGAAAAAAGTCGTGACTAACCTGACCAAAACCGTCAATGAAAA  
AAACAAAACGTCGATGCCAAAGTAAAAGCTGCAGAATCTGAAATAGAAAAGTTAACAGAC  
ACTGATGCCGCTTTAGCAGATACTGATGCCGCTCTGGATGCAACCACCAACGCTTGAAT  
AAATTGGGAGAAAAATAACGACATTTGCTGAAGAGACTAAGACAAATATCGTAAAAAATT  
GATGAAAAATTAGAAGCCGTGGCTGATACCGTCGACAAGCATGCCGAAGCATTCAACGAT  
ATCGCCGATTCAATTGGATGAAACCAACACTAAGGCAGACGAAGCCGTCAAAAACGCCAAT  
GAAGCCAAACAGACGGCCGAAGAAACCAAAACAAACGTCGATGCCAAAGTAAAAGCTGCA  
GAAACTGCAGCAGGCAAAGCCGAAGCTGCCGCTGGCACAGCTAATACTGCAGCCGACAAG  
GCCGAAGCTGTGCTGCAAAAGTTACCGACATCAAAGCTGATATCGCTACGAACAAAGAT  
AATATTGCTAAAAAAGCAAACAGTGCCGACGTGTACACCAGAGAAGAGTCTGACAGCAAA  
TTTGTGCAAAATTGATGGTCTGAACGCTACTACCGAAAAATGGACACACGCTTGGCTTCT  
GCCGAAAAATCCATTACCGAACACGGTACGCGCTGAACGGTTTGGATAGAACAGTGTCA  
GACCTGCGTAAAGAAACCCGCCAAGGCCTTGCAAGCAAGCCGCTCTCCGGTCTGTTC  
CAACCTTACAACGTTGGTCTGATTAATGTAACGGCTGCAGTCGGCGGCTACAAATCCGAA  
TCGGCAGTCGCCATCGGTACCGGCTTCCGCTTTACCGAAAACTTTGCCGCCAAAGCAGGC  
GTGGCAGTCGGCACTTCGTCCGGTCTTCCGCAGCCTACCATGTGGCGTCAATTACGAG  
TGGTAA

>NEIS1969\_117

ATGAAACACTTTCCATCCAAAGTACTGACCACAGCCATCCTTGCCACTTTCTGTAGCGGC  
GCACTGGCAGCCACAAACGACGACGATGTTAAAAAAGCTGCCACTGTGGCCATTGCTGCT  
GCCTACAACAATGGCCAAGAAATCAACGGTTTCAAAGCTGGAGAGACCATCTACGACATT  
GATGAAGACGGCACAATTACCAAAAAAGACGCAACTGCAGCCGATGTTGAAGCCGACGAC  
TTTAAAGGTCCTGGATCTGAAAAAAGTCGTGACTAACCTGACCAAAACCGTCAATGAAAA  
AAACAAAACGTCGATGCCAAAGTAAAAGCTGCAGAATCTGAAATAGAAAAGTTAACAAAC  
AAGTTAGCAGACACTGATGCCGCTCTGGATGCAACCACCAACGCTTGAATAAATTGGGA  
GAAAATATAACGACATTTGCTGAAGAGACTAAGACAAATATCGTAAAAAATTGATGAAAA  
TTAGAAGCCGTGGCTGATACCGTCGACAAGCATGCCGAAGCATTCAACGATATCGCCGAT  
TCATTGGATGAAACCAACACTAAGGCAGACGAAGCCGTCAAAAACGCCAATGAAGCCAAA  
CAGACGGCCGAAGAAACCAAAACAAACGTCGATGCCAAAGTAAAAGCTGCAGAAACTGCA  
GCAGGCAAAGCCGAAGCTGCCGCTGGCACAGCTAATACTGCAGCCGACAAGCCGAAGCT  
GTCGCTGCAAAAGTTACCGACATCAAAGCTGATATCGCTACGAACAAAGATAATATTGCT  
AAAAAAGCAAACAGTGGCAGCTGTACACCAGAGAAGAGTCTGACAGCAAAATTTGTGAGA  
ATTGATGGTCTGAACGCTACTACCGAAAAATTTGGACACACGCTTGGCTTCTGCCGAAAA  
TCCATTACCGAACACGGTACGCGCTGAACGGTTTGGATAGAACAGTGTGACACCTGCGT  
AAAGAAACCCGCCAAGGCCTTGCAAGCAAGCCGCTCTCCGGTCTGTTCACCTTAC  
AACGTGGGTCGGTTCATGTAACGGCTGCAGTCGGCGGCTACAAATCCGAATCGGCAGTC  
GCCATCGGTACCGGCTTCCGCTTTACCGAAAACTTTGCCGCCAAAGCAGGCGTGGCAGTC  
GGCACTTCGTCCGGTCTTCCGCAGCCTACCATGTGGCGTCAATTACGAGTGGTAA

>NEIS1969\_118

ATGAAACACTTTCAATCCAAAGTACTGACCGCAGCCATCCTTGCCGCCCTCAGCGGCAGC  
GCAATGGCAGACAACCCCCCTTCCACTGACGAAATTTGCCAAAGCCGCCCTGGTTGGAGTC  
TACAACAATACCCAAGACATCAACGGATTCAAAGTCGGAGACACCATCTACGACATTGAA  
AATGGCCAGCTTAAAGGAAGACCAACGAAGACGATGTTAAAGCCGATGACTTCGGC  
GGTCTGGGTCTGAAAGAAGTCTTGGCTCAACACGACCAAAGCCTTGCCGACCTGACCGGA  
ACCGTCGAGGAAAACAGCGAAGCATTGGTGAACACCGCCGAGGTTGTCAATGACATCAGT  
GCCGATGTCAAAGCCAACACAGCAGCTATCAGGGAAAACAAAGCTGCTATCGCTACAAAA  
GCAGACAAAACCGAACTGGATGAAGTGTCCGGCAAGGTAACCGCAAACGAGACTGCTATC  
GGTAAAAAAGCAAACAGTCCGACGCTGTACTAAAGCTGAGGTGTACACCAACAAGAG  
TCTGACAACAGATTTGTCAAATTTGGTGACAGAATCGGTAATCTGAACACTACTGCCAAT  
GGATTGGAGACAGCTTGGCCGATGCCGAAAAATCCGTTAAAGACCACGGTACGCGCTTG  
GCTTCTGCCGAAAAATCCATTACCGAACACGGTACGCGCTGAACGGTTTGGATAGAACA  
GTGTGACACCTGCGCAAAGAAACCCGCCAAGGCCTTGCAAGCAAGCCGCTCTCCGGC  
CTGTTCCAACCTTACAACGTTGGTTCGGTCAATGTAACGGCTGCAGTCGGCGGCTACAAA  
TCCGAATCGGCAGTCCCATCGGTACCGGCTTCCGCTTTACCGAAAACTTTGCCGCCAAA  
GCAGGCGTGGCAGTCGGCACTTCGTCCGGTCTTCCGCAGCCTACCATGTGGCGTCAAT  
TACGAGTGGTAA

>NEIS1969\_119

ATGAAACACTTTCAATCCAAAGTACTGACCGCAGCCATCCTTGCCGCCCTCAGCGGCAGC  
GCAATGGCAGACAACCCCCCTTCCACTGACGAAATTTGCCAAAGCCGCCCTAGTTAACTCC  
TACAACAATACCCAAGAAATCAACGGTTTCAAAGTCGGAGACACCATCTACGATATTGGT  
GAAAATAACAAAATTACCTCAAAAACAAGCAACAGAAGACGATGTTAAAGCCGACGACTTC  
GCGGCTCTGGGTCTGAAAGAAGTCTGGCTGAACACGACCAAAGCCTTGCCGACCTGACC

GAAACCGTCAATGAAAACAGCGAAGCATTGGTAAAAACTGCCGAAGTTGTCAATGAAATC  
AGTGCCGATGTAAGCCAAACACAGCAGCTATCGCTGAAAAAGCAGAAAAACCGAACTG  
GATAAAGTGTCCAAAAGGCGACAGAAAAACGCTGATGATATCGCTACAAAAGCAGAAAA  
ACCGAATGGATAAAGTATCCAAAAGGCGACAGAAAAACGCTGATGCTATCGCTACAAA  
GCAAAACAGTCCGACGTGTACACTAAAACCCAGTCTGACGAAAAGATTTGTCAGAATTGAT  
ACCAGCATCGGTGGTCTGACCACTACTGCCGATGGATTGGATACACGCTTGAAGACTGCC  
GAAAAAACCATTACCGAACACGGTACGCGCTGGACGGCTTGGATAAAAACAGTGTACAGAC  
CTGCGCAAAGAAACCCGCCAAGGCCCTTGCCTGCACAAGCAGCCCTCAGCGGTCTGTTCCAA  
CCTTACAGCGTTGGTAAGTTCAACGTTACCCTGCTTTGGGTGGCTTCAAATCTGACACC  
GCAGTTGCAGTGGGTGCAGGCTACCCTTCAATGAAAACCTTGCAGCTAAAGCCGGTCTT  
GCAGTGGGTACCTCTTCAAGAGGCTCTGCATCTTACAACGTAGGTTTGAAGTACGAATGG  
TAA

>NEIS1969\_120

ATGAAACACTTTCAATCCAAAGTACTGACCGCAGCCATCCTTGCCCTCCTTCTGTAGCGGC  
GCGCTGGCGGCAACGAAGTGAATGGTGTACGACCGAGGCCAAGCCAAACAGATGGAGAA  
GTTGCCGACAGCCGCTTGGTTGGAGTCTACAACAATACCCAAAGAAATCAACGGTTTCAA  
GTCCGAGACACCATCTACGACATTGATGGAAACGGCAAAATACCGACAGAGAAGCAACC  
CAAGAAGATGTCGATAACGACGACTTTAAAGTCTGGGTCTGAAAGAAGTCTGGCTCAA  
CACGACCAAAGCCTTGCCGACCTGACCGAAACCGTCAATGAAAACAGCGAAGCATTGGTA  
AAAACCGCCGCGTTGTCAATGACATCAGTCCGATGTCAAAGCCAAACACAGCAGCTATC  
GGGAAAACAAAGCTGCTATCGCCAAAAGGCAGATCAAACCGCATTGGATGCAGTATCC  
GAAAAGGTAACCGCAAATGAACTGCTATCGGTAAAAAAGCAAACAGTCCCGACGTGTAC  
ACTAAAGCTGAGGTGTACACCAAACAAGAGTCTGACAACAGATTTGTCAAATTTGGTGAC  
AGCATCGGTAATCTGAACACTACTGCCAATGGATTGGAGACACGCTTGGCCGCTGCCGAA  
AAATCTGTTGCAGACCAGGTACTCGCTTGGCTTCTGCCGAAAAATCCATTACCGAACAC  
GGTACGCGCTGAACCGTTTGGATAAAAACAGTGTACAGCTGCGCAAAGAAACCCGCCAA  
GGCCTTGCAGAAACAAGCCGCTCTCCGGCCTGTTCCAACCTTACAACGTGGGTTCGGTTC  
AATGTAACGGCTGCAGTCCGGCGCTACAAATCCGAATCGGCAGTCCGCATCGGTACCGGC  
TCCGCTTTACCGAAAACCTTTGCCGCCAAGCAGGCGTGGCAGTCCGCATCTCGTCCGGT  
TCTTCCGACGCTACCATGTCCGGCTCAATTACGAGTGGTAA

>NEIS1969\_121

ATGAAACACTTTCAATCCAAAGTACTGACCGCAGCCATCCTTGCCGCCCTCAGCGGCAGC  
GCAATGGCAGACAACCCCCCTTCCACTGACGAAATGGCACAGCCGCCCTGGTTGGA  
TCTTACAACAATGCCCAAGAAATCAACAGTTTCGAAGTCCGAGACGCCATCTACGGCATT  
GATGGAGACGGCAAAATACCAAAAAACAGCAACCCAAAGAAGATGTCGATAACGACGAC  
TTTAAAGTCTGGGTCTGAAAGAAGTCTTGGCTCGACACGACCAAAGCCTTGCCGACCTG  
ACCGAAACCGTCCGAGGAAAACAGCGAAGCATTGGTAAAAACCGCCGAGGTTGTCAATGAC  
ATCAGTGCAGATGTCAAAGCCAAACACAGCAGCTATCGGGGAAAACAAAGCTGCTATCGCT  
ACAAAAGCAGACAAAACCGAACTGGATAAAGTGTCCGGCAAAGTAACCGAGAACGAGACT  
GCTATCGGTAAGAAAGCAAACAGTCCGACGCTGTACACTAAAGCTGAGGTGTACACAAA  
CAAGAGTCTGACAACAGATTTGTCAAATTAGTGACGGAATCGGTAATCTGAACACTACT  
GCCAATGGATTGGAGACAGCTTGGCCGCTGCCGAACAATCCGTTGCAGACCAGGTTACG  
CGCTTGGCTTCTGCCGAAAAATCCATTACCGAACCGGTACGCGCCTGAACGGTTTGGAT  
AGAACAGTGTGACAGCTGCGTAAAGAAACCCGCCAAGGCCCTGCGAACAAGCCGCGCTC  
TCCGGTCTGTTCCAACCTTACAACGTGGGTTCGTTCAATGTAACGGCTGCAGTCCGGCGC  
TACAAATCCGAATCGGCAGTCCGCATCGGTACCGGCTTCCGCTTACCGAAAACCTTTGCC  
GCCAAAGCAGGCGTGGCAGTCCGCATCTCGTCCGGTCTTCCGACGCTACCATGTCCGGC  
GTCAATTACGAGTGGTAA

>NEIS1969\_122

ATGAAACACTTTCCATCCAAAGTACTGACCACAGCCATCCTTGCCACTTTCTGTAGCGGC  
GCACTGGCAGCCACAAACGACGACGATGTTAAAAAAGCTGCCACTGTGGCCATTGCTGCT  
GCCTACAACAATGGCCAAGAAATCAACGGTTTCAAAGCTGGAGAGACCATCTACGACATT  
GATGAAGACGCGACAATTACCAAAAAAGACGCAACTGCAGCCGATGTTGAAGCCGACGAC  
TTTAAAGTCTGGGTCTGAAAAAAGTCTGACTAACCTGACCAAAAACCGTCAATGAAAAC  
AAACAAAACGTCGATGCCAAAGTAAAAGCTGCAGAATCTGAAATAGAAAAGTTAACAACC  
AAGTTAGCAGACACTGATGCCGCTTTAGCAGATACTGATGCCGCTCTGGATGCAACCACC  
AACGCCTTGAATAAATTTGGGAGAAAAATATAACGACATTTGCTGAAGAGACTAAGACAAAT  
ATCGTAAAAAATTGATGAAAAATTAGAAGCCGTGGCTGATACCGTGCACAAGCATGCCGAA  
GCATTAACGATATCGCCGATTCATTGGATGAAACCAACACTAAGGCGGACGAAAGCCGTC  
AAAACCGCCAATGAAGCCAAACAGACGGCCGAAGAAACCAAACAAAACGTCGATGCCAAA  
GTAAAAGCTGCAGAACTGCAGCAGGCAAAGCCGAAGCTGCCGCTGGCACAGCTAATACT  
GCAGCCGACAAGGCCGAAGCTGTGCTGCAAAAAGTTACCGACATCAAAGCTGATATCGCT  
ACGACAACAAGATAATATTGCTAAAAAAGCAAACAGTCCCGACGTGTACACCAGAGAAGAG  
TCTGACAGCAAAATTTGTCAAGATTTGATGGTCTGAACGCTACTACCGAAAAATTTGGACACA  
CGCTTGGCTTCTGTGAAAAATCCATTGCCGATCACGATACTCGCCTGAACGGTTTGGAT  
AAAACAGTGTGACAGCTGCGCAAAGAAACCCGCCAAGGCCCTTGCAGAACAAAGCCGCGCTC  
TCCGGTCTGTTCCAACCTTACAACGTGGGTTCGTTCAATGTAACGGCTGCAGTCCGGCGC

TACAAATCCGAATCGGCAGTCGCCATCGGTACCGGCTTCCGCTTTACCGAAAACCTTTGCC  
GCCAAAGCAGGCGTGGCAGTCGGCACTTCGTCCGGTTCTTCCGCAGCCTACCATGTCCGG  
GTCAATTACGAGTGGTAA

>NEIS1969\_123

ATGAAACACTTTCCATCCAAAGTACTGACCACAGCCATCCTTGCCACTTTCTGTAGCGGC  
GCACTGGCAGCCACAAGCGACGACGATGTTAAAAAAGCTGCCACTGTGGCCATTGTTGCT  
GCCTACAACAATGGCCAAGAAATCAACGGTTTCAAAGCTGGAGAGACCATCTACGACATT  
GGTGAAGACGGCACAATTACCCAAAAAGACGCAACTGCAGCCGATGTTGAAGCCGACGAC  
TTTAAAGGTCTGGGTCTGAAAAAGTCGTGACTAACCTGACCAAACCCGTCAATGAAAACA  
AACAAAACGTCGATGCCAAAGTAAAAGCTGCAGAATCTGAAATAGAAAAGTTAAACAACCA  
AGTTAGCAGACACTGATGCCGCTTTAGCAGATACTGATGCCGCTCTGGATGAAACCACCA  
ACGCTTGAATAAATTGGGAGAAAATATAACGACATTTGCTGAAGAGACTAAGACAAATA  
TCGTAAAAATGATGAAAAATTAGAAGCCGTGGCTGATACCGTCGACAAGCATGCCGAAG  
CATTCAACGATATCGCCGATTCAATTGGATGAAACCAACACTAAGGCAGACGAAGCCGTCA  
AAACCGCCAATGAAGCCAAACAGACGGCCGAAAGAAACCAAACAAACGTCGATGCCAAAG  
TAAAAGCTGCAGAACTGCAGCAGGCAAAGCCGAAGCTGCCGCTGGCACAGCTAATACTG  
CAGCCGACAAGCCGAAGCTGTCGCTGCAAAAGTTACCGACATCAAAGCTGATATCGCTA  
CGAACAAAGCTGATATTGCTAAAAACTCAGCACGCATCGACAGCTTGGACAAAACGCTAG  
CTAATCTGCGCAAAGAAACCCGCCAAGGCCCTTGCAAGAACAAGCCGCGCTCTCCGGCCTGT  
TCCAACCTTACAACGTGGGTCCGTTCAATGTAACGGCTGCAGTCGGCGGCTACAAATCCG  
AATCGGCAGTCGCCATCGGTACCGGCTTCCGCTTTACCGAAAACCTTTGCCGCCAAAGCAG  
GCGTGGCAGTCGGCACTTCGTCCGGTTCTTCCGCAGCCTACCATGTCCGGCTCAATTACG  
AGTGGTAA

>NEIS1969\_124

ATGAAACACTTTCCATCCAAAGTACTGACCGCAGCCATCCTTGCCCTTCTGTAGCGGC  
GCGCTGGCAGCATCAAACAGTGTATGAGACCGAGGTCATCGACCACACGCTCGAGAAGTTG  
CCACAGCCGCCCTGGTTGGAGCCTACAACAATGCCCAAGAAATCAACGGTTTCAAAGTCG  
GAGACACCATCTACGACATTAATGGAAGCGCGGAAATTACCCCAAAGAAGCAACCCAAAG  
AAGATGTCGATAACGACGACTTTAAAGGTCTGGGTCTGAAAGAAGTCGTGGCTCAACACG  
ACCAAAGCCTTGGCGACCTGACCGGAATCGTCGAGGAAAACAGCGAAGCATTGGTAAAAA  
CCGCCAAGGTTGTCAATGACATCAGTGCCTGATGTCATTGACAACACAGCAGCTATCCGGG  
AAAACAAAGCTGCTATCGCCAAAAAGGCAGATCAAACCGCATTGGATGCAGTATCCGAAA  
AGGTAACCGCAAATGAAACTGCTATCGCTACAAAAGCAGACAAAACCGAACTGGATAAAG  
TGTCCGGCAAAGTAACCGCAAACGAGACTGCTATCGCTACAAAAGCAAACAGTGCAGCAG  
TGTACACTAAAGCTGAGGTGTACACCAAACAAGAGTCTGACAACAGATTTGTCAAAATG  
GTGACAGAATCGGTAATCTGAACACTACTGCCGATGGATTGGATACACGCTTGAAGACTG  
CCGAAAAAACCATTACCGAACACGGTACGCGCCTGGACGGCTTGGATAAAACAGTGTCAA  
ACCTGCGTAAAGAAACCCGCCAAGGCCCTTGCAAGAACAAGCCGCGCTCTCCGGCCTGTTCC  
AACCTTACAACGTGGGTCCGTTCAATGTAACGGCTGCAGTCGGCGGCTACAAATCCGAAT  
CGGCAGTCGCCATCGGTACCGGCTTCCGCTTTACCGAAAACCTTTGCCGCCAAAGCAGGCG  
TGGCAGTCGGCACTTCGTCCGGTTCTTCCGCAGCCTACCATGTCCGGCTCAATTACGAGT  
GGTAA

>NEIS1969\_125

ATGCAACACTTTCCATCCAAAGTACTGACCACAGCCATCCTTGCCACTTTCTGTAGCGGC  
GCACTGGCAGCCACAAACGACGACGATGTTAAAAAAGCTGCCCTGTGGCCATTGCTGCTG  
CCTACAACAATGGCCAAGAAATCAACGGTTTCAAAGCTGGAGAGACCATCTACGACATTG  
ATGAAGACGGCACAATTACCAAAAAAGACGCAACTGCAGCCGATGTTGAAGCCGACGACT  
TTAAAGGTCTGGGTCTGAAAAAGTCGTGACTAACCTGACCAAACCCGTCAATGAAAACA  
AACAAAACGTCGATGCCAAAGTAAAAGCTGCAGAATCTGAAATAGAAAAGTTAAACAACCA  
AGTTAGCAGACACTGATGCCGCTTTAGCAGATACTGATGCCGCTCTGGATGCAACCACCA  
ACGCTTGAATAAATTGGGAGAAAATATAACGACATTTGCTGAAGAGACTAAGACAAATA  
TCGTAAAAATGATGAAAAATTAGAAGCCGTGGCTGATACCGTCGACAAGCATGCCGAAG  
CATTCAACGATATCGCCGATTCAATTGGATGAAACCAACACTAAGGCAGACGAAGCCGTCA  
AAACCGCCAATGAAGCCAAACAGACGGCCGAAAGAAACCAAACAAACGTCGATGCCAAAG  
TAAAAGCTGCAGAACTGCAGCAGGCAAAGCCGAAGCTGCCGCTGGCACAGCTAATACTG  
CAGCCGACAAGCCGAAGCTGTCGCTGCAAAAGTTACCGACATCAAAGCTGATATCGCTA  
CGAACAAAGATAATATTGCTAAAAAGCAAACAGTGCAGCAGCTGTACACCAGAGAAGAGT  
CTGACAGCAAATTTGTGAGAATTTGATGGTCTGAACGCTACTACCGAAAATTTGGACACAC  
GCTTGGCTTCTGCTGAAAAATCCATTGCCGATCACGATACTCGCCTGAACGGTTTGGATA  
AAACAGTGTGACACTGCGCAAAGAAACCCGCCAAGGCCCTTGCAAGAACAAGCCGCGCTCT  
CCGGTCTGTTCCAACCTTACAACGTGGGTCCGTTCAATGTAACGGCTGCAGTCGGCGGCT  
ACAAATCCGAATCGGCAGTCGCCATCGGTACCGGCTTCCGCTTTACCGAAAACCTTTGCCG  
CCAAAGCAGGCGTGGCAGTCGGCACTTCGTCCGGTTCTTCCGCAGCCTACCATGTCCGGC  
TCAATTACGAGTGGTAA

>NEIS1969\_126

ATGAAACACTTTCCATCCAAAGTACTGACCACAGCCATCCTTGCCACTTTCTGTAGCGGC

GCACTGGCAGCCACAAACGACGACGATGTTAAAAAGCTGCCACTGTGGCCATTGCTGCT  
GCCTACAACAATGGCCAAGAAATCAACGGTTTCAAAGCTGGAGAGACCATCTACGACATT  
GATGAAGACGGCACAATTACCAAAAAAGACGCAACTGCAGCCGATGTTGAAGCCGACGAC  
TTTAAAGGTCCTGGGTCTGAAAAAGTCTGACTAACCTGACCAAAACCGTCAATGAAAAC  
AAACAAAACGTCGATGCCAAAGTAAAAAGCTGCAGAATCTGAAATAGAAAAGTTAACAACC  
AAGTTAGCAGACACTGATGCCGCTCTGGATGCAACCACCAACGCTTGAATAAATTGGGA  
GAAAATATAACGACATTTACTGAAGAGACTAGGGCGTGTCTCAATTTAACTTAGCATGA  
ATAATAGAGCAAGCCAAGTAAAGCATCGATTTAAAATTACGAGCTAATTTCTCATAGCGA  
GTAGCAATACTACGAACTGCTTTAATCGTGCAAAATGCATTCTCGACTAAGTGGCGTAAT  
TTATAAAGGTAGCTATCAAAATCAGGGTTAGGTTTCTTGGCATTTTTACGCTTTGGTATA  
ATAGCTTTTCATACCGTGTTCATCGCTTTATCTCTGATTTCTTGCAGTCATACCCTTTG  
TCAGCGATAAAAATACTGGGCTTCTTGTATGACTTCTATCAAGTCGTTTGCAACTTGACCG  
TCGTGCACGTTACCCCCAGTACTTTAAAATCGAGCGGATTTCCATGCGAGTCCACACAT  
AGGTGTATTTTGTGCTGTTTCCGCCACGGCTTTGTCCAATTGCTCTATCGAAACCACGC  
CGAGCTCCACTTGCATGTTGATGACACCGTACATAACTTCCGTCGATGAATACCCATTCT  
TTGTCAATTTCTTTTTCGTAGATCAAAAAAATTCTGCCACAAGCCTTTTTTAGACCATC  
GGTTAAAGCGGTTATAAGCGGTTTTCCATGACCCTAGCTCAATAGGTATGTCTCGCCATG  
GTGCACCTGTTCTTAGCTTCCATAGTATGGCTTCCATCACGGTACGGTCTGTTCTTCCATT  
GATGACAGCCGTGCGCTTTCATGGTTGTTTGAATTGTTCCCATATGTTGTCAGTTATTG  
CGGTTCTCGCCATTGTTTGTGTTTGCCTATATTTCTGTTGGAATATAGGGTTAAAATAGGG  
CTCTTTTGGGCTTATTCAAATTAGGGACACGCCCTAAGACAAATATCGTAAAAATTGATG  
AAAAATTAGAAGCCGTGGCTGATACCGTTCGACAAGCATGCCGAAGCATTCAACGATATCG  
CCGATTCAATGGATGAAACCAACACTAAGGCAGACGAAGCCGTCAAAACCGCCAATGAAG  
CCAACAGACGGCCGAAGAAACCAAAACAAAACGTCGATGCCAAAGTAAAAGCTGCAGAAA  
CTGCCGCTGGCAGACTAATACTGCAGCCGACAAGGCCGAAGCTGTGCGTGCAAAAGTTA  
CCGACATCAAAGCTGATATCGCTACGAACAAAAGATAATATTGCTAAAAAAGCAAACAGTG  
CCGACGTGTACACCAGAGAAGAGTCTGACAGCAAAATTTGTGAGAATTGATGGTCTGAACG  
CTACTACCGAAAAATTGGACACACGCTTGGCTTCTGCCGAAAAATCCATTACCGAACCG  
GTACGCGCTGAACGGTTTGGATAGAACAGTGTGACACCTGCGTAAAGAAACCGCCAAG  
GCCTTGCAGAAACAGCCGCTCTCCGGTCTGTTCCAACCTTACAACGTGGGTGCGTTCA  
ATGTAACGGCTGCAGTCGGCGGCTACAAATCCGAATCGGCAGTCGCCATCGGTACCGGCT  
TCCGCTTTACCGAAAACCTTCCGCCAAAGCAGGCGTGGCAGTCGGCACCTTCTGTCGGTT  
CTTCCGCAGCCTACCATGTTCGGCTCAATTACGAGTGGTAA

>NEIS1969\_127

ATGAAACACTTTCCATCCAAAGTACTGACCACAGCCATCCTTGCCACTTTCTGTAGCGGC  
GCACTGGCAGCCACAAGCGACGACGATGTTAAAAAGCTGCCACTGTGGCCATTGTTGCT  
GCCTACAACAATGGCCAAGAAATCAACGGTTTCAAAGCTGGAGAGACCATCTACGACATT  
GGTGAAGACGGCACAATTACCCAAAAAGACGCAACTGCAGCCGATGTTGAAGCCGACGAC  
TTTAAAGGTCCTGGGTCTGAAAAAGTCTGACTAACCTGACCAAAACCGTCAATGAAAAC  
AAACAAAACGTCGATGCCAAAGTAAAAGCTGCAGAATCTGAAATAGAAAAGTTAACAACC  
AAGTTAGCAGACACTGATGCCGCTTTAGCAGATACTGATGCCGCTCTGGATGAAACCACC  
AACGCCTTGAATAAATTGGGAGAAAAATATAACGACATTTGCTGAAGAGACTAAGACAAAT  
ATCGTAAAAAATTGATGAAAAATTAGAAGCCGTGGCTGATACCGTCGACAAGCATGCCGAA  
GCATTTCAACGATATCGCCGATTCATTGGATGAAACCAACACTAAGGCAGACGAAGCCGTC  
AAAACCGCCAATGAAGCCAAACAGACGGCCGAAGAAACCAAAACAAAACGTCGATGCCAAA  
GTAAAAGCTGCAGAAACTGCAGCAGGCAAAGCCGAAGCTGCCGCTGGCAGCTAATACT  
GCAGCCGACAAGGCCGAAGCTGTGCGTGCAAAAAGTTACCGACATCAAAGCTGATATCGCT  
ACGAACAAAGCTGATATTGCTAAAAACTCAGCACGCATCGACAGCTTGGACAAAACGTA  
GCTAATCTCGCAAAGAAACCCGCCAAGGCTTGCAGAACAAGCCGCTCTCCGGCTG  
TTCCAACCTTACAACGTGGGTGCGTTCAATGTAACGGCTGCAGTCGGCGGCTACAAATCC  
GAATCGGCAGTCGCCATCGGTACCGCTTCCGCTTTACCGAAAACCTTCCGCCAAAGCA  
GGCGTGGCAGTCGGCACCTTCTCCGGTTCTTCCGCAGCCTACCATGTTCGGCTCAATTAC  
GAGTAG

Text S1. Neis1969 (*nadA*) nucleotide sequences available at the time of writing.

>NadA\_peptide\_1  
MKHFPSKVLTTAILATFCSGALAATSDDDDVKKAAATVAIAAAYNNGQEINGFKAGETIYDI  
GEDGTITQKDATAADVEADDFKGLGGLKVVVTLTKTVNENKQNVDAKVKAAESEIEKLTT  
KLADTDAALADTDAALDATTNALNKLGENITTFAEETKTNIVKIDKLEAVADTVDKHAE  
AFNDIADSLDETNTKADEAVKTANEAKQTAETKQNVDAKVKAAETAAGKAEAAAAGTANT  
AADKAEAVAAKVTDIKADIATNKADIANKSARIDSLDKNVANLRKETRQGLAEQAALSGL  
FQPYNVGRFNVTAAVGGYKSESAVAIGTGFRFTENFAAKAGVAVGTSSGSSAAYHVG VNY  
EW

>NadA\_peptide\_2  
MKHFPSKVLTTAILATFCSGALAATNDDDDVKKAAATVAIAAAYNNGQEINGFKAGETIYDI  
DEDGTITKKDATAADVEADDFKGLGGLKVVVTLTKTVNENKQNVDAKVKAAESEIEKLTT  
KLADTDAALDATTNALNKLGENITTFAEETKTNIVKIDKLEAVADTVDKHAEAFNDIAD  
SLDETNTKADEAVKTANEAKQTAETKQNVDAKVKAAETAAGTANTAADKAEAVAAKVTD  
IKADIATNKDNIAKKANSADVYTREESDSKFVRI DGLNATTEKLDTRLASAEKSITEHGT  
RLNGLDRTVSDLRKETRQGLAEQAALSGLFQPYNVGRFNVTAAVGGYKSESAVAIGTGFR  
FTENFAAKAGVAVGTSSGSSAAYHVG VNYEW

>NadA\_peptide\_3  
MKHFPSKVLTTAILATFCSGALAATNDDDDVKKAAATVAIAAAYNNGQEINGFKAGETIYDI  
DEDGTITKKDATAADVEADDFKGLGGLKVVVTLTKTVNENKQNVDAKVKAAESEIEKLTT  
KLADTDAALDATTNALNKLGENITTFAEETKTNIVKIDKLEAVADTVDKHAEAFNDIAD  
SLDETNTKADEAVKTANEAKQTAETKQNVDAKVKAAETAAGKAEAAAAGTANTAADKAEA  
VAAKVTDIKADIATNKDNIAKKANSADVYTREESDSKFVRI DGLNATTEKLDTRLASAEK  
SITEHGT RLNGLDRTVSDLRKETRQGLAEQAALSGLFQPYNVGRFNVTAAVGGYKSES AV  
AIGTGFRFTENFAAKAGVAVGTSSGSSAAYHVG VNYEW

>NadA\_peptide\_4  
MKHFPSKVLTTAILATFCSGALAATNDDDDVKKAAATVAIAAAYNNGQKINGFKAGETIYDI  
DEDGTITKKDATAADVEADDFKGLGGLKVVVTLTKTVNENKQNVDAKVKAAESEIEKLTT  
KLADTDAALDATTNALNKLGENITTFAEETKTNIVKIDKLEAVADTVDKHAEAFNDIAD  
SLDETNTKADEAVKTANEAKQTAETKQNVDAKVKAAETAAGKAEAAAAGTANTAADKAEA  
VAAKVTDIKADIATNKDNIAKKANSADVYTREESDSKFVRI DGLNATTEKLDTRLASAEK  
SITEHGT RLNGLDRTVSDLRKETRQGLAEQAALSGLFQPYNVGRFNVTAAVGGYKSES AV  
AIGTGFRFTENFAAKAGVAVGTSSGSSAAYHVG VNYEW

>NadA\_peptide\_5  
MKHFQSKVLTTAILATFCSGALAATNDDDDVKKAAATVAIAAAYNNGQEINGFKAGETIYDI  
DEDGTITKKDATAADVEADDFKGLGGLKVVVTLTKTVNENKQNVDAKVKAAESEIEKLTT  
KLADTDAALDATTNALNKLGENITTFAEETKTNIVKIDKLEAVADTVDKHAEAFNDIAD  
SLDETNTKADEAVKTANEAKQTAETKQNVDAKVKAAETAAGKAEAAAAGTANTAADKAEA  
VAAKVTDIKADIATNKDNIAKKANSADVYTREESDSKFVRI DGLNATTEKLDTRLASAEK  
SITEHGT RLNGLDRTVSDLRKETRQGLAEQAALSGLFQPYNVGRFNVTAAVGGYKSES AV  
AIGTGFRFTENFAAKAGVAVGTSSGSSAAYHVG VNYEW

>NadA\_peptide\_6  
MKHFPSKVLTTAILATFCSGALAATNDDDDVKKAAATVAIAAAYNNGQEINGFKAGETIYDI  
DEDGTITKKDATAADVEADDFKGLGGLKVVVTLTKTVNENKQNVDAKVKAAESEIEKLTT  
KLADTDAALADTDAALDATTNALNKLGENITTFAEETKTNIVKIDKLEAVADTVDKHAE  
AFNDIADSLDETNTKADEAVKTANEAKQTAETKQNVDAKVKAAETAAGKAEAAAAGTANT  
AADKAEAVAAKVTDIKADIATNKDNIAKKANSADVYTREESDSKFVRI DGLNATTEKLD  
RLASAEKSITEHGT RLNGLDRTVSDLRKETRQGLAEQAALSGLFQPYNVGRFNVTAAVGG  
YKSESAVAIGTGFRFTENFAAKAGVAVGTSSGSSAAYHVG VNYEW

>NadA\_peptide\_7  
MQHFPSKVLTTAILATFCSGALAATNDDDDVKKAAATVAIAAAYNNGQEINGFKAGETIYDI  
DEDGTITKKDATAADVEADDFKGLGGLKVVVTLTKTVNENKQNVDAKVKAAESEIEKLTT  
KLADTDAALADTDAALDATTNALNKLGENITTFAEETKTNIVKIDKLEAVADTVDKHAE  
AFNDIADSLDETNTKADEAVKTANEAKQTAETKQNVDAKVKAAETAAGKAEAAAAGTANT  
AADKAEAVAAKVTDIKADIATNKDNIAKKANSADVYTREESDSKFVRI DGLNATTEKLD  
RLASAEKS IADHDTRLNGLDKTVSDLRKETRQGLAEQAALSGLFQPYNVGRFNVTAAVGG  
YKSESAVAIGTGFRFTENFAAKAGVAVGTSSGSSAAYHVG VNYEW

>NadA\_peptide\_8  
MKHFPSKVLTTAILATFCSGALAATNDDDDVKKAAATVAIAAAYNNGQEINGFKAGETIYDI  
DEDGTITKKDATAADVEADDFKGLGGLKVVVTLTKTVNENKQNVDAKVKAAESEIEKLTT  
KLADTDAALADTDAALDATTNALNKLGENITTFAEETKTNIVKIDKLEAVADTVDKHAE  
AFNDIADSLDETNTKADEAVKTANEAKQTAETKQNVDAKVKAAETAAGKAEAAAAGTANT  
AADKAEAVAAKVTDIKADIATNKDNIAKKANSADVYTREESDSKFVRI DGLNATTEKLD  
RLASAEKS IADHDTRLNGLDKTVSDLRKETRQGLAEQAALSGLFQPYNVGRFNVTAAVGG

YKSESAVAIGTGFRFTENFAAKAGVAVGTSSGSSAAYHVGVNYEW

>NadA\_peptide\_9

MKHFPKSVLTTAILATFCGALAAATNDDDDVKKAAATVAIAAAYNNGQEINGFKAGETIYDI  
DEDGTITKKDATAADVEADDFKGLGLKKVVNTLTKTVNENKQNVDAKVKAAESEIEKLTT  
KLADTDAALADTDAALDATTNALNKLGENITTFAEETKTNIVKIDEKLEAVADTVDKHAE  
AFNDIADSLDETNTKADEAVKTANEAKQTAETKQNVDAKVKAAETAAGKAEAAAAGTANT  
AADKAEAVAAKVTDIKADIATNKDNI AKKANSADVTTREESDSKFVRI DGLNATTEKLDT  
RLASAEKSIAEHGTRLNGLDKTVSDLRKETRQGLAEQAALSGLFQPYNVGRFNVTAAVGG  
YKSESAVAIGTGFRFTENFAAKAGVAVGTSSGSSAAYHVGVNYEW

>NadA\_peptide\_21

MKHFPKSVLTTAAILAALSAMADNAPTADEI AKAALVNSYNNTQDINGFTVGDIIYDI  
NDKITKKEATEADVEADDFKGLGLKEVVAQHDQSLADLTETVNSEALVKTAAVVNDIS  
ADV KANTAAI GENKAAIATKADKTEL D KVS GKVTENETAI GK KANSADVTKAEVYTKQE  
SDNRFVKISDGI GNLT TANGLETR LAAAEQSVADHGTR LSAEKSITEHGTRLNGLDRT  
VSDLRKETRQGLAEQAALSGLFQPYNVGRFNVTAAVGGYKSESAVAIGTGFRFTENFAAK  
AGVAVGTSSGSSAAYHVGVNYEW

>NadA\_peptide\_25

MKHFPKSVLTTAILATFCGALAAATSDDDVKKAAATVAIVAAAYNNGQEINGFKAGETIYDI  
GEDGTITQKDATAADVEADDFKGLGLKKVVNTLTKTVNENKQNVDAKVKAAETAAGKAEA  
AAGTANTAADKAEAVAAKVTDIKADIATNKADI AKNSARIDSLDKNVANLRKETRQGLAE  
QAALSGLFQPYNVGRFNVTAAVGGYKSESAVAIGTGFRFTENFAAKAGVAVGTSSGSSAA  
YHVGVNYEW

>NadA\_peptide\_26

MKHFPKSVLTTAAILASFCGALAAATNDDDDVKKAAATVAIAAAYNNGQEINGFKAGETIYDI  
DEDGTITKKDATAADVEADDFKGLGLKKVVNTLTKTVNENKQNVDAKVKAAESEIEKLTT  
KLADTDAALDATTNALNKLGENITTFAEETKTNIVKIDEKLEAVADTVDKHAEAFNDIAD  
SLDETNTKADEAVKTANEAKQTAETKQNVDAKVKAAETAAGKAEAAAAGTANTAADKAEA  
VAAKVTDIKADIATNKDNI AKKANSADVTTREESDSKFVRI DGLNATTEKLDTRLASAEK  
SITEHGTRLNGLDRTVSDLRKETRQGLAEQAALSGLFQPYNVGRFNVTAAVGGYKSESAV  
AIGTGFRFTENFAAKAGVAVGTSSGSSAAYHVGVNYEW

>NadA\_peptide\_28

MKHFPKSVLTTAILATFCGALAAATSDDDVKKAAATVAIVAAAYNNGQEINGFKAGETIYDI  
GEDGTITQKDATAADVEADDFKGLGLKKVVNTLTKTVNENKQNVDAKVKAAESEIEKLTT  
KLADTDAALADTDAALDETTNALNKLGENITTFAEETKTNIVKIDEKLEAVADTVDKHAE  
AFNDIADSLDETNTKADEAVKTANEAKQTAETKQNVDAKVKAAETAAGKAEAAAAGTANT  
AADKAEAVAAKVTDIKADIATNKADI AKNSARIDSLDKNVANLRKETRQGLAEQAALSGL  
FQPYNVGRFNVTAAVGGYKSESAVAIGTGFRFTENFAAKAGVAVGTSSGSSAAYHVGVNY  
EW

>NadA\_peptide\_58

MKHFPKSVLTTAILATFCGALAAATSDDDVKKAAATVAIVAAAYNNGQEINGFKAGETIYDI  
GEDGTITQKDATAADVEADDFKGLGLKKVVNTLTKTVNENKQNVDAKVKAAESEIEKLTT  
KLADTDAALADTDAALDETTNALNKLGENITTFAEETKTNIVKIDEKLEAVADTVDKHAE  
AFNDIADSLDETNTKADEAVKTANEAKQTAETKQNVDAKVKAAETAAGKAEAAAAGTANT  
AADKAEAVAAKVTDIKADIATNKADI AKNSARIDSLDKNVANLRKETRQGLAEQAALSGL  
FQPYNMGRFNVTAAVGGYKSESAVGTSSGSSAAYHVGVNYEW

>NadA\_peptide\_79

MKHFPKSVLTTAAILAALSAMADNPPSTDEI AKAALVGVYNTQDINGFKVGDIIYDI  
ENGQPKGRPATEDDDVKADDFGGLGLKEVLAQHDQSLADLTGTVEENSEALVKTAEVVNDI  
SADV KANTAAI RENKAAIATKADKTEL DEVSGKVTANETAI GK KANSADVTKAEVYTKQ  
ESDNRVFKIGDRIGNLT TANGLETR LADAEKSVKDHGTR LSAEKSITEHGTRLNGLDR  
TVSDLRKETRQGLAEQAALSGLFQPYNVGRFNVTAAVGGYKSESAVAIGTGFRFTENFAA  
KAGVAVGTSSGSSAAYHVGVNYEW

>NadA\_peptide\_85

MKHFPKSVLTTAILATFCGALAAATSDDDVKKAAATVAIVAAAYNNGQEINGFKAGETIYDI  
GEDGTITQKDATAADVEADDFKGLGLKKVVNTLTKTVNENKQNVDAKVKAAESEIEKLTT  
KLADTDAALADTDAALDETTNALNKLGENITTFAEETKTNIVKIDEKLEAVADTVDKHAE  
AFNDIADSLDETNTKADEAVKTANEAKQTAETKQNVDAKVKAAETAAGKAEAAAAGTANT  
AADKAEAVAAKVTDIKADIATNKADI AKNSARIDSLDKNVANLRKETRQGLTEQAALSGL  
FQPYNVGRFNVTAAVGGYKSESAVAIGTGFRFTENFAAKAGVAVGTSSGSSAAYHVGVNY  
EW

>NadA\_peptide\_86

MKHFPSKVLTTAILATFCSGALAATSDDDDVKKAAATVAIVAAAYNNGQEINGFKAGETIYDI  
GEDGTITQKDATAADVEADDFKGLGGLKVVVTLTKTVNETKQNVDAKVKAAETAAGKAEA  
AAGTANTAADKAEVAAKVTDIKADIATNKADI AKNSARIDSLDKNVANLRKETRQGLAE  
QAALSGLFQPYNVGRFNVTAAVGGYKSESAVAIGTGFRFTENFAAKAGVAVGTSSGSSAA  
YHVG VNYEW

>NadA\_peptide\_87

MKHFQSKVLTAAILAALS GSAMADNPPPPSTDEI AKAALVNSYNNTQDINGFKVGD TIYD  
IENGQPKGRSATEDDDVKADDFGGLGGLKEVVAQHDQSLADLTETVNSEALVKTAEVVNE  
ISTDVKANKAAITTKADKAKLDEVSGKVTANETA IATKANSADVYTKTQSDERFVRIDTS  
IGGLTTTADGLDTRLKTAEKTI TEHGTRLSAEKSI TEHGTRLNGLDRTVSDLRKETRQ  
LAEQAALSGLFQPYNVGRFNVTAAVGGYKSESAVAIGTGFRFTENFAAKAGVAVGTSSGS  
SAAYHVG VNYEW

>NadA\_peptide\_89

MKHFQSKVLTAAILAALS GSAMADNPPPLPLTKLPKPWLESTTI PKTSTDSKSETPSTTL  
KMASLKEDQQKDDVKADDFGGLGGLKEVLAQHDQSLADLTGTVEENSEALVKTAEVVNDI  
SADVKANTAAIRENKA AIATKADKTELDEVSGKVTANETA IGKKANSADVYTKAEVYTKQ  
ESDNRVFKIGDRIGNLNTTANGLETRLADAESVKDHGTRLVSAEKSI TEHGTRLNGLDR  
TVSDLRKENRQGLAEQAALSGLFQPYNVGRFNVTAAVGGYKSESAVAIGTGFRFTENFAA  
KAGVAVGTSSGFFAAYHVG VNYEW

>NadA\_peptide\_91

MKHFPSKVLTTAILATFCSGALAATNDDDDVKKAAATVAIAAAYNNGQEINGFKAGETIYDI  
DEDGTITKKDATAADVEADDFKGLGGLKVVVTLTKTVNENKQNVDAKVKAAETAAGKAEA  
AAGTANTAADKAEVAAKVTDIKADIATNKDNI AKKANSADVYTREESDSKFVRIDGLNA  
TTEKLDTRLASA EKSIADHDTRLNGLDKTVSDLRKETRQGLAEQAALSGLFQPYNVGRFN  
VTAAVGGYKSESAVAIGTGFRFTENFAAKAGVAVGTSSGSSAAYHVG VNYEW

>NadA\_peptide\_92

MKHFPSKVLTAAILAALS GSAMADNAPTADEI AKAALVNSYNNTQDINGFTVGD TIYDID  
GNNKIIEKKATQEDVDNDDFKGLGGLKEVVAQHDQSLADLTETVNSEALVKTAEVVNEI  
STDVKANKAAITTKADKAKLDEVSGKVTANETA IATKADKAKLDEVSGKVTANETA IATK  
ADKAKLDEVSGKVTANETA IATKANSADVYTKTQSDERFVRIDTSIGGLTTTADGLDTRL  
KTAEKTI TEHGTRLNGLDRTVSDLRKETRQGLAEQAALSGLFQPYNVGRFNVTAAVGGYK  
SESAVAIGTGFRFTENFAAKAGVAVGTSSGSSAAYHVG VNYEW

>NadA\_peptide\_98

MKHFQSKVLTAAILAALS GSAMADNPPSTDEI AKAALVNSYNNTQDINGFKVGD TIYDIN  
GNGKITRKTATEDDDVKADDFGGLGGLKEVLAQHDQSLADLTGTVDENSEALVKTAEVVNDI  
SADVKANTAAIGENKAAI AKKADQ TALDAVSEKVTANETA IGKKANSADVYTKAEVYTKQ  
ESDNRVFKIGDRIGNLNTTANGLETRLADAESKVADHGTRLSAEKSI TEHGTRLNGLDR  
TVSDLRKETRQGLAEQAALSGLFQPYNVGRFNVTAAVGGYKSESAVAIGTGFRFTENFAA  
KAGVAVGTSSGSSAAYHVG VNYEW

>NadA\_peptide\_100

MKHFPSKVLTTAILATFCSGALAATSDDDDVKKAAATVAIVAAAYNNGQEINGFKAGETIYDI  
GEDGTITQKDATAADVEADDFKGLGGLKVVVTLTKTVNENKQNVDAKVKAAESEIEKLT  
KLADTDAALADTDAALDETTNALKLGENITTF AEETKTNI VKIDEKLEAVADTVDKHAE  
AFNDIADSLDETNTKAEAVKTANEAKQTAEETKQNVDAKVKAAETAAGKAEAAAAGTANT  
AADKAEVAAKVTDIKADIATNKADI AKNSARIDSLDKNVANLRKETRQGLAEQAALSGL  
FQPYNVGRFNVTAAVGGYKSESAVAIGTASALPKTLPKQAWQSALRPVLPQPTMSASIT  
SGKQHLPIKKPQPCAAVFI FYPVRLPRPNVRPCGYGLPPQPAAQKSCRFRFFPNAPPR  
QSRQSRVPQHHPPTPARF

>NadA\_peptide\_101

MQHFPSKVLTTAILATFCSGALAATNDDDDVKKAAATVAIVAAAYNNGQEINGFKAGETIYDI  
DEDGTITKKDATAADVEADDFKGLGGLKVVVTLTKTVNENKQNVDAKVKAAESEIEKLT  
KLADTDAALADTDAALDATNALKLGENITTF AEETKTNI VKIDEKLEAVADTVDKHAE  
AFNDIADSLDETNTKAEAVKTANEAKQTAEETKQNVDAKVKAAETAAGKAEAAAAGTANT  
AADKAEVAAKVTDIKADIATNKADI AKNSARIDSLDKNVANLRKETRQGLAEQAALSGL  
FQPYNVGRFNVTAAVGGYKSESAVAIGTGFRFTENFAAKAGVAVGTSSGSSAAYHVG VNY  
EW

>NadA\_peptide\_103

MKHFPSKVLTTAILATFCSGALAATSDDDDVKKAAATVAIVAAAYNNGQEINGFKAGETIYDI  
GEDGTITQKDATAADVEADDFKGLGGLKVVVTLTKTVNENKQNVDAKVKAAESEIEKLT  
KLADTDAALDTDAALDETTNALKLGENITTF AEETKTNI VKIDEKLEAVADTVDKHAE  
AFNDIADSLDETNTKAEAVKTANEAKQTAEETKQNVDAKVKAAETAAGKAEAAAAGTANT  
AADKAEVAAKVTDIKADIATNKADI AKNSARIDSLDKNVANLRKETRQGLAEQAALSGL

FQPYNVGRFNVTAAVGGYKSESAVAIGTGFRFTENFAAKAGVAVGTSSGSSAAYHVGVNY  
EW

>NadA\_peptide\_105

MKHFP SKVLTTAILATFCSGALAATSDDDDV KKAATVAIVAAAYNNGQEINGFKAGETIYDI  
GEDGTITQKDATAADVEADDFKGLGLKVVVTLTKTVNENKQNVDAKVKAAESEIEKLTT  
KLADTDAALADTDAALDETTNALNKLGENITTF AEETKTNIVKIDEKLEAVADTVDKHAE  
AFNDIADSLDETNTKAEAVKTANEAKQTAEETKQNVDAKVKAAETAAGKAEAAAAGTANT  
AADKAEAVAAKVTDIKADIATNKADI AKNSARIDSLDKNVANLRKETRQGLAEQAALSGL  
FQPYNVGRFNVTAAVDGYKSESAVAIGTGFRFTENFAAKAGVAVGTSSGSSAAYHVGVNY  
EW

>NadA\_peptide\_106

MKHFP SKVLTTAILATFCSGALAATSDDDDV KKAATVAIVAAAYNNGQEINGFKAGETIYDI  
GEDGTITQKDATAADVEADDFKGLGLKVVVTLTKTVNENKQNVDAKVKAAESEIEKLTT  
KLADTDAALADTDAALDETTNALNKLGENITTF TEETKTNIVKIDEKLEAVADTVDKHAE  
AFNDIADSLDETNTKAEAVKTANEAKQTAEETKQNVDAKVKAAETAAGKAEAAAAGTANT  
AADKAEAVAAKVTDIKADIATNKADI AKNSARIDSLDKNVANLRKETRQGLAEQAALSGL  
FQPYNVGRFNVTAAVGGYKSESAVAIGTGFRFTENFAAKAGVAVGTSSGSSAAYHVGVNY  
EW

>NadA\_peptide\_108

MKHFP SKVLTTAILATFCSGALAATNDDDDV KKAATVAIAAAYNNGQEINGFKAGETIYDI  
DEDGTITKKDATAADVEADDFKGLGLKVVVTLTKTVNENKQNVDAKVKAAESEIEKLTT  
KLADTDAALADTDAALDATTNALNKLGENITTF AEETNTNIVKIDEKLEAVADTVDKHAE  
AFNDIADSLDETNTKAEAVKTANEAKQTAEETKQNVDAKVKAAETAAGKAEAAAAGTANT  
AADKAEAVAAKVTDIKADIATNKDNI AKKANSADVTTREESDSKFVRI DGLNATTEKLDT  
RLASAEKSIADHDTRLNGLDRTVSDLRKETRQGLAEQAALSGLFQPYNVGRFNVTAAVGG  
YKSESAVAIGTGFRFTENFAAKAGVAVGTSSGSSAAYHVGVNYEW

>NadA\_peptide\_110

MKHFP SKVLTTAILATFCSGALAATSDDDDV KKAATVAIVAAAYNNGQEINGFKAGETIYDI  
GEDGTITQKDATAADVEADDFKGLGLKVVVTLTKTVNENKQNVDAKVKAAESEIEKLTT  
KLADTDAALADTDAALDETTNALNKLGENITTF AEETKTNIVKIDEKLEAVADTVDKHAE  
AFNDIADSLDETNTKAEAVKTANEAKQTAEETKQNVDAKVKAAETAAGKAEAAAAGTANT  
AADKAEAVAAKVTDIKADIATNKADI AKNSARIDSLDKNVANLRKETRQGLAEQAALSGL  
FQPYNVGRFNVTAAVGGYKSESAVAIGTGFRFTENFAAKAGVAVGTSSGSSAAYHVGVNY  
E

>NadA\_peptide\_112

MKHFP SKVLTTAILATFCSGALAATSDDDDV KKAATVAIVAAAYNNGQEINGFKAGETIYDI  
GEDGTITQKDATAADVEADDFKGLGLKVVVTLTKTVNENKQNVDAKVKAAESEIEKLTT  
KLADTDAALADTDAALDETTNALNKLGENITTF AEETKTNIVKIDEKLEAVADTVDKHAE  
AFNDIADSLDETNTKAEAVKTANEAKQTAEETKQNVDAKVKAAETAAGKAEAAAAGTANT  
AADKAEAVAAKVTDIKADIATNKADI AKNSARIDSLDKNVANLRKETRQGLAEQAALSGL  
FQPYNVGRFNVTAAVGGYKSESAVAIGTGFRFTENFAAKAGVAVGTSSGSSAADHVGVNY  
EW

>NadA\_peptide\_113

MKHFP SKVLTTAILATFCSGALAATNDDDDV KKAATVAIAAAYNNGQEINGFKAGETIYDI  
DEDGTITKKDATAADVEADDFKGLGLKVVVTLTKTVNENKQNVDAKVKAAESEIEKLTT  
KLADTDAALDATTNALNKLGENITTF AEETKTNIVKIDEKLEAVADTVDKHAEAFNDIAD  
SLDETNTKAEAVKTANEAKQTAEETKQNVDAKVKAAETAAGKAEAAAAGTANTAADKAEA  
VAAKVTDIKADIATNKADI AKNSARIDSLDKNVANLRKETRQGLAEQAALSGLFQPYNVG  
RFNVTAAVGGYKSESAVAIGTGFRFTENFAAKAGVAVGTSSGSSAAYHVGVNYEW

>NadA\_peptide\_114

MKHFP SKVLTAAILAALS GSAMAGNPPLSTDEIATAAMVGSYNNAQEINGFEVGD TIYDI  
NGDGKITKKTATQEDVDNDDFKGLGLKEV LARHDQSLADLTGTVEENSEALVKTAEVVND  
ISADV KANTAAI GENKAAIATKADKTEL DKVSGKVTENETAIGKKANSADVTKAEVYTK  
QESDNRFVKISDGI GNLTNANGLETR LAAAEQSVADHGTRLASAEKSI TEHGTRLNGLD  
RTVSDLRKETRQGLAEQAALSGLFQPYNVGRFNVTAAVGGYKSESAVAIGTGFRFTENFA  
AKAGVAVGTSSGSSAAYHVGVNYEW

>NadA\_peptide\_115

MKHFP SKVLTTAILATFCSGALAATNDDDDV KKAATVAIAAAYNNGQEINGFKAGETIYDI  
DEDGTITKKDATAADVEADDFKGLGLKVVVTLTKTVNENKQNVDAKVKAAESEIEKLTT  
KLADTDAALDATTNALNKLGENITTF AEETKTNIVKIDEKLEAVADTVDKHAEAFNDIAD  
SLDETNTKAEAVKTANEAKQTAEETKQNVDAKVKAAETAAGKAEAAAAGTANTAADKAEA  
VAAKVTDIKADIATNKDNI AKKANSADVTTREESDSKFVRI DGLNATTEKLDTRLASAEK

SITEHGTRLNGLDRTVSDLRKETRQGLAEQAALSGLFQPYNVGRFNVTAAVGGYKSESAV  
AIGTGFRFTENFAAKAGVAVGTSSGSSAAYHVG VNYEW

>NadA\_peptide\_116

MKHFPSKVLTAAILAALS GSGSAMADNAPTADEI AKAALVNSYNNTQDINGFTVGD TIIYDID  
GNNKIIEKKATQEDVDNDDFKGLGLKEVVAQH DQSLADLTETV NENSEALVKTA EVVNEI  
STDVKANKAAITTKADKAKLDEVSGKVTANETA IATKADKAKLDEVSGKVTANETA IATK  
ANSADVYTKTQSDERFVRIDT SIGGLTTTADGLDTRLKTA EKTITEHGTRLNGLDRTVSD  
LRKETRQGLAEQAALSGLFQPYNVGRFNVTA AVGGYKSESAVAIGTGFRFTENFAAKAGV  
AVGTSSGSSAAYHVG VNYEW

>NadA\_peptide\_117

MKHFQSKVLTAAILAALS GSGSAMADNAPTADEI AKAALVNSYNNTQDINGFKAGDTIYDIG  
EDGTITQKDATAADVEADDFKGLGLKVVV TNLTKTVNENKQNVDAKV KAAESEIEKLTTK  
LADTDAALADTDAALDETTNALNKLGENITTF AEETKTNIVKIDEKLEAVADTVDKHAEA  
FNDIADSLDETNTKGRSRQNPMPKPNRRPKKPNKTSMPKV KAAETAAGKAEAAAAGTANT  
AADKAEVAAKVTDIKADIATNKDNI AKKANSADV TREESDSKFVRIDGLNATTEKLD T  
RLASAEKSIADHDTRLNGLDKTVSDLRKETRQGLAEQAALSGLFQPYNVGRFNVTA AVGG  
YKSESAVAIGPGFRFTENFAAKAGVAVGTSSGSSAAYHVG VNYEW

>NadA\_peptide\_118

MKHFPSKVLTTAILATFCSGALAA TSDDDVKKAATVAIVAA YNNGQEINGFKAGETIYDI  
GEDGTITQKDATAADVEADDFKGLGLKVVV TNLTKTVNENKQNVDAKV KAAESEIEKLT T  
KLADTDAALADTDAALDETTNALNKLGENITTF AEETKTNIVKIDEKLEAVADTVDKHAE  
AFNDIADSLDETNTKADEAVKTANEAKQTAEETKQNVDAKV KAAETAAGKAEAAAAGTANT  
AADKAEVAAKVTDIKADIATNKADI AKNSARIDSLDKNVANLRKETRQGLAEQAALSGL  
FQPYNVGRFNVTA AVGGYKSESAV TIGTGFRFTENFAAKAGVAVGTSSGSSAAYHVG VNY  
EW

>NadA\_peptide\_119

MKHFPSKVLTTAILATFCSGALAA TNDDDVKKAATVAIAAAYNNGQEINGFKAGETIYDI  
DEDGTITKKDATAADVEADDFKGLGLKVVV TNLTKTVNENKQNVDAKV KAAESEIEKLT T  
KLADTDAALDATTNALNKLGENITTF AEETKTNIVKIDEKLEAVADTVDKHAEAFNDIAD  
SLDETNTKADEAVKTANEAKQTAEETKQNVDAKV KAAETA AVKAAETAAGTANTAADKAE  
AVAAKVTDIKADIATNKDNI AKKANSADV TREESDSKFVRIDGLNATTEKLDTRLASAE  
KSITEHGTRLNGLDRTVSDLRKETRQGLAEQAALSGLFQPYNVGRFNVTA AVGGYKSESA  
VAIGTGFRFTENFAAKAGVAVGTSSGSSAAYHVG VNYEW

>NadA\_peptide\_120

MKHFPSKVLTTAILATFCSGALAA TNDDDVKKAATVAIAAAYNNGQEINGFKAGETIYDI  
DEDGTITKKDATAADVEADDFKGLGLKVVV TNLTKTVNENKQNVDAKV KAAESEIEKLT D  
TDAALADTDAALDATTNALNKLGENITTF AEETKTNIVKIDEKLEAVADTVDKHAEAFND  
IADSLDETNTKADEAVKTANEAKQTAEETKQNVDAKV KAAETAAGKAEAAAAGTANTAADK  
AEVAAKVTDIKADIATNKDNI AKKANSADV TREESDSKFVRIDGLNATTEKLDTRLASAE  
AEKSI TEHGTRLNGLDRTVSDLRKETRQGLAEQAALSGLFQPYNVGRFNVTA AVGGYKSE  
SAVAIGTGFRFTENFAAKAGVAVGTSSGSSAAYHVG VNYEW

>NadA\_peptide\_121

MKHFPSKVLTTAILATFCSGALAA TNDDDVKKAATVAIAAAYNNGQEINGFKAGETIYDI  
DEDGTITKKDATAADVEADDFKGLDLKVVV TNLTKTVNENKQNVDAKV KAAESEIEKLT T  
KLADTDAALDATTNALNKLGENITTF AEETKTNIVKIDEKLEAVADTVDKHAEAFNDIAD  
SLDETNTKADEAVKTANEAKQTAEETKQNVDAKV KAAETAAGKAEAAAAGTANTAADKAE  
VAAKVTDIKADIATNKDNI AKKANSADV TREESDSKFVRIDGLNATTEKLDTRLASAEK  
SITEHGTRLNGLDRTVSDLRKETRQGLAEQAALSGLFQPYNVGRFNVTA AVGGYKSESAV  
AIGTGFRFTENFAAKAGVAVGTSSGSSAAYHVG VNYEW

>NadA\_peptide\_122

MKHFQSKVLTAAILAALS GSGSAMADNPPSTDEI AKAALVGVYNNTQDINGFKVGD TIIYDIE  
NGQPKGRPATEDDVKADDFGGLGLKEVLAQH DQSLADLTGTVEENSEALVKTA EVVNDIS  
ADV KANTAAI RENKAAIATKADKTELDEVSGKVTANETA I GKKANSADVTKAEVYTKQE  
SDNRVFKIGDRIGNLNTTANGLETRLADA EKSVDHGTRLASAEKSI TEHGTRLNGLDRT  
VSDLRKETRQGLAEQAALSGLFQPYNVGRFNVTA AVGGYKSESAVAIGTGFRFTENFAAK  
AGVAVGTSSGSSAAYHVG VNYEW

>NadA\_peptide\_123

MKHFQSKVLTAAILAALS GSGSAMADNAPPAD EIAKAALVNSYNITQEINGFKVGD TIIYDIG  
ENNKITSKQATEDDVKADDFGGLGLKEVVAEHDQSLADLTETV NENSEALVKTA EVVNEI  
SADV KANTAAIAEKA EKTLDKVS KADKNADDIATKA EKTLDKVS KADKNADA IATK  
ANSADVYTKTQSDERFVRIDT SIGGLTTTADGLDTRLKTA EKTITEHGTRLDGLDKTVSD  
LRKETRQGLAAQAALSGLFQPY SVGKFNVTAALGGFKSDTAVAVGAGYRFNENFAAKAGL

AVGTSSRGSASYNVGLNYEW

>NadA\_peptide\_124

MKHFQSKVLTAAILASFCGALAATNWNQDTEAKPTDGEVAAAALVGVYNNNTQEINGFK  
VGDTIYDIDGNGKITDREATQEDVDNDDFKGLGLKEVVAQHDQSLADLTETVNENSEALV  
KTAAVVNDISADVKANTAAIGENKAAIAKKADQTALDAVSEKVTANETAIGKKANSADV  
TKAEVYTKQESDNRFVKIGDSIGNLNTTANGLETRLAAAEKSVADHGTRLASAESITEH  
GTRLNGLDKTVSDLRKETRQGLAEQAALSGLFQPYNVGRFNVTAAVGGYKSESVAVAIGTG  
FRFTENFAAKAGVAVGTSSGSSAAYHVGNYEW

>NadA\_peptide\_125

MKHFQSKVLTAAILAALSGSAMADNPPPSTDEIATAALVGSYNNAQEINSFEVGDAIYGI  
DGDGKITKKKTATQEDVDNDDFKGLGLKEVVARHDQSLADLTGTVEENSEALVKTAEVVND  
ISADVKANTAAIGENKAAIATKADKTELDKVGKVTENETAIGKKANSADVTKAEVYTK  
QESDNRFVKISDGIGNLNTTANGLETRLAAAEQSVADHGTRLASAESITEHGTRLNGLD  
RTVSDLRKETRQGLAEQAALSGLFQPYNVGRFNVTAAVGGYKSESVAVAIGTGFRFTENFA  
AKAGVAVGTSSGSSAAYHVGNYEW

Text S2. Neis1969 (NadA) amino acid sequences available at the time of writing.

## Query NEIS1969 (nadA) sequences - Neisseria locus/sequence definitions database

**Locus:**  Page will reload when changed  
 • Further information is available for this locus.

Please enter your search criteria below (or leave blank and submit to return all records).

**Locus fields:**  >  +

**Display:** Order by:   Display:  records per page

**Filter query by:** status:  allele flag:

**Action:**

96 records returned (1 - 25 displayed). Click the hyperlinks for detailed information.

Page:     >

| locus           | allele id | sequence                            | sequence length | comments              | NadA peptide | checked | NadA variant | flags                          |
|-----------------|-----------|-------------------------------------|-----------------|-----------------------|--------------|---------|--------------|--------------------------------|
| NEIS1969 (nadA) | 1         | ATGAAACACTTTCCA ... AATTACGAGTGGTAA | 1089            |                       | 1            |         | NadA-1       |                                |
| NEIS1969 (nadA) | 2         | ATGAAACACTTTCCA ... AATTACGAGTGGTAA | 1176            |                       | 2            |         | NadA-2/3     |                                |
| NEIS1969 (nadA) | 3         | ATGAAACACTTTCCA ... AATTACGAGTGGTAA | 1197            |                       | 3            |         | NadA-2/3     |                                |
| NEIS1969 (nadA) | 5         | ATGAAACACTTTCCA ... AATTACGAGTGGTAA | 1218            |                       | 6            |         | NadA-2/3     |                                |
| NEIS1969 (nadA) | 6         | ATGAAACACTTTCCA ... AATTACGAGTGGTAA | 1218            |                       | 7            |         | NadA-2/3     |                                |
| NEIS1969 (nadA) | 7         | ATGAAACACTTTCCA ... AATTACGAGTGGTAA | 1218            |                       | 8            |         | NadA-2/3     |                                |
| NEIS1969 (nadA) | 8         | ATGAAACACTTTCCA ... AATTACGAGTGGTAA | 1218            |                       | 9            |         | NadA-2/3     |                                |
| NEIS1969 (nadA) | 9         | ATGAAACACTTTCCA ... AATTACGAGTGGTAA | 1094            |                       |              |         | NadA-6       | frameshift                     |
| NEIS1969 (nadA) | 10        | ATGAAACACTTTCCA ... AATTACGAGTGGTAA | 1197            |                       | 3            |         | NadA-2/3     |                                |
| NEIS1969 (nadA) | 11        | ATGAAACACTTTCCA ... AATTACGAGTGGTAA | 1197            |                       | 4            |         | NadA-2/3     |                                |
| NEIS1969 (nadA) | 12        | ATGAAACACTTTCCA ... AATTACGAGTGGTAA | 974             |                       |              |         | NadA-4/5     | frameshift phase variable: off |
| NEIS1969 (nadA) | 13        | ATGAAACACTTTCCA ... AATTACGAGTGGTAA | 1197            |                       | 5            |         | NadA-2/3     |                                |
| NEIS1969 (nadA) | 16        | ATGAAACACTTTCCA ... AATTACGAGTGGTAA | 2021            | IS1301                |              |         | NadA-2/3     | contains IS element            |
| NEIS1969 (nadA) | 19        | ATGAAACACTTTCCA ... CCAGCTCGATTTTGA | 1317            |                       | 100          |         | NadA-1       | atypical                       |
| NEIS1969 (nadA) | 20        | ATGAAACACTTTCCA ... AATTACGAGTGGTAA | 878             | FS:ΔA286 and deletion |              |         | NadA-2/3     | frameshift                     |
| NEIS1969 (nadA) | 22        | ATGAAACACTTTCCA ... AATTACGAGTGGTAA | 2023            | IS1301                |              |         | NadA-2/3     | contains IS element            |
| NEIS1969 (nadA) | 25        | ATGAAACACTTTCCA ... AATTACGAGTGGTAA | 971             |                       | 21           |         | NadA-4/5     |                                |
| NEIS1969 (nadA) | 27        | ATGAAACACTTTCCA ... AATTACGAGTGGTAA | 750             |                       | 86           |         | NadA-1       |                                |
| NEIS1969 (nadA) | 29        | ATGAAACACTTTCCA ... AATTACGAGTGGTAA | 2021            | IS1301                |              |         | NadA-2/3     | contains IS element            |
| NEIS1969 (nadA) | 34        | ATGAAACACTTTCCA ... AATTACGAGTGGTAA | 976             |                       |              |         | NadA-4/5     | frameshift phase variable: off |
| NEIS1969 (nadA) | 35        | ATGAAACACTTTCCA ... AATTACGAGTGGTAA | 1089            |                       | 101          |         | NadA-1       |                                |
| NEIS1969 (nadA) | 37        | ATGAAACACTTTCCA ... AATTACGAGTGGTAA | 1026            |                       |              |         | NadA-6       | frameshift                     |

Fig. S1. Screenshot from the public database Query page.

| Previous nomenclature |         | New nomenclature |         |
|-----------------------|---------|------------------|---------|
| Variant               | Peptide | Variant          | Peptide |
| 1                     | 1       | 1                | 1       |
| 2                     | 1       | 2/3              | 2       |
| 2                     | 2       | 2/3              | 3       |
| 2                     | 3       | 2/3              | 4       |
| 2                     | 4       | 2/3              | 5       |
| 2                     | 5       | 2/3              | 6       |
| 3                     | 1       | 2/3              | 7       |
| 3                     | 2       | 2/3              | 8       |
| 3                     | 3       | 2/3              | 9       |
| 5                     | 1*      | 4/5              | 6       |
| 5                     | 2*      | 4/5              | 6       |
| 5                     | 3*      | 4/5              | 6       |

Table S1. Comparison between the previous classification (1) and the new nomenclature scheme. The asterisk (\*) indicates peptide identifiers assigned to frameshifted sequences.

## References

1. **Bambini S, Muzzi A, Olcen P, Rappuoli R, Pizza M, Comanducci M.** 2009. Distribution and genetic variability of three vaccine components in a panel of strains representative of the diversity of serogroup B meningococcus. *Vaccine* **27**:2794-2803.
